# Supplementary material for: Mitogenomic data indicate admixture components of Central-Inner Asian and Srubnaya origin in the conquering Hungarians
Source: PLoS One. 2018 Oct 18;13(10):e0205920. doi: 10.1371/journal.pone.0205920 (PMC6193700; doi:10.1371/journal.pone.0205920)
Supplement: S3 Table — Table a. Modern population database with NCBI GenBank accession numbers and haplogroups given next to population abbreviations (provided in S3B Table). 314 newly deposited mitogenomes from [29] including 272 Hungarian, 46 French, 18 Croatian, 12 Belgian, 11 German and 12 Romanian samples are provided at the end of the list. Table b. Summary of the modern (top) and ancient (below) population database with abbreviations used in this study. In case of low sample size related neighboring populations were merged whose list is provided next to their group name. Table c. Ancient mtDNA genome database. Pink background highligts samples, for which sequence was not available, so these were only included in SHD analysis. Yellow background highlights haplogroups, which were classified differently by Haplofind than published originally (Haplofind/original). Supplementary references are provided below the table. Table d. Ancient samples considered only in the phylogenetic analysis but not used in population genetic analysis. Supplementary references are provided below the table. (XLSX) [file pone.0205920.s005.xlsx]

## Sheet: S3a modern pop datbase
S3a Table: Modern population database with NCBI GenBank accession numbers and haplogroups given next to population abbreviations (provided in S3b Table). 314 newly deposited mitogenomes from [29] including 272 Hungarian, 46 French, 18 Croatian, 12 Belgian, 11 German and 12 Romanian samples are provided at the end of the list.
Adg_rec	556714303	H2a1c
Adg_rec	556714289	H1c
Adg_rec	556714275	U1a1a
Adg_rec	556714261	H3am
Adg_rec	556714247	H5
Adg_rec	556714233	H11a2
Adg_rec	556714219	T2
Adg_rec	556714205	C4a1
Adg_rec	556714191	J1c3k
Adg_rec	556714177	H2a1
Adg_rec	556714163	T2c1
Adg_rec	556714149	H3am
Adg_rec	556714135	K1a4i
Adg_rec	556714121	T2a1b2b
Adg_rec	556714107	R1a
Adg_rec	556714093	U3b3
Adg_rec	556714079	U4b1a1a1
Adg_rec	530847995	W1i
Adg_rec	385257948	T2c1
Adg_rec	385257934	T2l
Adg_rec	385257192	T2b
Adg_rec	385256800	T2a1b2b
Adg_rec	385254574	J1d3a1
Adg_rec	385253580	J1c3k
Alt_rec	1049306835	D4j
Alt_rec	1049306821	C4a1a3b
Alt_rec	215276284	A
Alt_rec	183211914	D5c1a
Alt_rec	183211913	D5c1a
Alt_rec	168252343	D4m2a
Alt_rec	168252329	D4o1
Alt_rec	168252315	D4j10
Alt_rec	168252301	D4j10
Alt_rec	168252287	C4a1a3b
Alt_rec	168252273	D4j10
Alt_rec	168252259	D5a2a1
Alt_rec	168252245	D4j7
Alt_rec	168252231	D4b1a2a1
Alt_rec	168252217	C4b6
Alt_rec	168251461	C5c
Alt_rec	50295422	B4b1a
Alt_rec	50295421	Z1
Alt_rec	50295420	B4a1c2
Alt_rec	50295411	C4a1a3a1
Alt_rec	229503854	C5c
Alt_rec	229503840	C4a1a4a
Alt_rec	229503826	C4a1a5
Alt_rec	229503812	C4e
Alt_rec	229503798	C4e
Alt_rec	229503784	C4a2a1
Alt_rec	229503770	C4a2a1
Alt_rec	229503756	C4a1a4a
Alt_rec	229501572	C4b6
Alt_rec	229501558	D4e5a
Alt_rec	229501544	C4a2a1
Alt_rec	229501530	D4p
Alt_rec	229501516	C4b3
Alt_rec	229501502	D4b1a2a2
Alt_rec	229501488	C4b
Alt_rec	229501474	C4a1a3
Alt_rec	229501460	C4a1a4a
Alt_rec	229501446	C4a1a3
Alt_rec	229501432	C5b1a
Alt_rec	229501418	C5d1
Alt_rec	229501404	C5a1
Alt_rec	124388056	J1b1b1a
Alt_rec	119035670	X2e2a1
Alt_rec	119034886	X2e2a1
Alt_rec	119034872	A14
Alt_rec	119034858	A1a1
Alt_rec	119034844	G1a1b
Alt_rec	119034830	X2e2a1
Alt_rec	683416730	K1a3
Alt_rec	683416716	H3h2a
Alt_rec	683416702	U3b2
Alt_rec	683416688	I4a
Alt_rec	683416674	H2a1a
Alt_rec	683416660	H2b
Alt_rec	683416632	K1a4
Alt_rec	683416604	H6a1
Alt_rec	683416576	U4b1b1c
Alt_rec	683416562	H3g3
Alt_rec	215882438	D4b1a2a1
Alt_rec	215882424	A25
Alt_rec	215276283	U4a1d
Alt_rec	197254233	D5c1a
Alt_rec	197254219	D4p
Alt_rec	197254205	Z1a
Alt_rec	197254191	U5a1d2b
Alt_rec	197254177	U4b1a4
Alt_rec	197254163	U4b1b1c
Alt_rec	197254149	U4b1a4
Alt_rec	197254135	U4b1a4
Alt_rec	197254107	U2e1
Alt_rec	197254093	H8b1
Alt_rec	197254079	HV9b
Alt_rec	197254065	R9b1a2a
Alt_rec	197254051	N9a9
Alt_rec	197254037	X2e2a1
Alt_rec	356467032	M10a1
Alt_rec	356467018	B4b1a3a
Alt_rec	356466402	B5b4
Alt_rec	356466388	B4b1a3a
Alt_rec	356466374	M10a1a1b1
Alt_rec	356466360	R11b1a
Alt_rec	356466346	B4b1a3a
Alt_rec	356466332	M11b2
Arb_rec	381277799	K1a31
Arb_rec	381277785	K1a7
Arb_rec	164519750	M30
Arb_rec	164519736	M65
Arb_rec	164519722	M52b
Arb_rec	164519708	M36a
Arb_rec	164519694	M33a2
Arb_rec	164519680	M1a4
Arb_rec	164519666	M1b1a
Arb_rec	70955832	H6a1a
Arb_rec	113201638	R0a2i
Arb_rec	113201624	R0a2h
Arb_rec	113201610	R0a1a
Arb_rec	113201596	R0a2c
Arb_rec	113201582	R0a1a
Arb_rec	113201568	R0a1b
Arb_rec	113201554	R0a1a
Arb_rec	113201540	M14
Arb_rec	109289500	M1a1b1b1
Arb_rec	914343322	M20
Arb_rec	914343308	M30b
Arb_rec	914343294	M1a2b
Arb_rec	914343280	M7c1c3
Arb_rec	914343266	M1b2c
Arb_rec	914343252	M81
Arb_rec	914343238	M1b1a
Arb_rec	914343224	M1a1e2
Arb_rec	914343210	M1a1i
Arb_rec	914343196	M3c1b1
Arb_rec	914343182	M1a2a
Arb_rec	914343168	M5a2a1a2
Arb_rec	914343154	M1a1a1
Arb_rec	914343140	M1a1d
Arb_rec	914343126	D4b2b
Arb_rec	914343112	M32c
Arb_rec	914343098	E1a1a1a
Arb_rec	749396772	L3i1a
Arb_rec	727354522	L2a1l2a
Arb_rec	727354508	M42b1
Arb_rec	727354480	X1c
Arb_rec	727354452	N3a
Arb_rec	727354382	N1a3a2
Arb_rec	727354368	N1a3a
Arb_rec	727354284	R1a
Arb_rec	727354270	R0a2c
Arb_rec	727354256	R8a
Arb_rec	727354242	R6a1
Arb_rec	556704895	HV0f
Arb_rec	556704881	R0a2f
Arb_rec	556704853	H6b
Arb_rec	556704839	T2c1c1
Arb_rec	556704825	M1b1a
Arb_rec	556704811	X2e2a2
Arb_rec	556704797	U1b1
Arb_rec	556704783	L3h1a2a1
Arb_rec	556704769	H2a1e
Arb_rec	556704755	K1a17
Arb_rec	556704741	T1a2
Arb_rec	556704727	N1b1a
Arb_rec	556704713	HV15
Arb_rec	556704699	L0a1a
Arb_rec	556704685	T1a7
Arb_rec	556704671	T2b
Arb_rec	556704657	H1e
Arb_rec	556704643	R0a2f
Arb_rec	556704629	W8
Arb_rec	556704615	X2m'n
Arb_rec	556704587	T2a2
Arb_rec	556704573	L0a1a1
Arb_rec	556704559	N1a1a3
Arb_rec	556704545	H1
Arb_rec	556704531	R0a2
Arb_rec	556704517	L1b1a2
Arb_rec	556704503	L2b1a2
Arb_rec	556704489	HV1c
Arb_rec	556704475	J1c10a
Arb_rec	556704461	J2a2a1a1
Arb_rec	556704447	H
Arb_rec	556704433	L0a1b1a
Arb_rec	556704419	R0a1
Arb_rec	556704405	K1a4b1
Arb_rec	556704391	L2a1c3a
Arb_rec	556704363	R0a2c
Arb_rec	556704349	L2b1a2
Arb_rec	556704335	U1a1c1d
Arb_rec	556704321	H1
Arb_rec	556704307	J1b2
Arb_rec	556704293	M1a1b2
Arb_rec	556704279	U7a2a
Arb_rec	556704265	L2a1
Arb_rec	556704251	I5a1c
Arb_rec	556704237	U7a4
Arb_rec	393190763	U6b
Arb_rec	512392319	N1a3a
Arb_rec	512392305	N1a3a
Arb_rec	427338228	M1a1f
Arb_rec	427338214	M1a1b1b1
Arb_rec	385256660	T1b
Arm_rec	1075192446	T1a1
Arm_rec	1069642020	R2b
Arm_rec	1069642006	U1a2
Arm_rec	1062951001	U3b2
Arm_rec	1062950815	H5m
Arm_rec	1062950603	K1a27
Arm_rec	1062946342	U1a1a
Arm_rec	1062945933	H14b3
Arm_rec	1062944971	R0a2i
Arm_rec	1062944781	T1a1
Arm_rec	1062944610	U3b2
Arm_rec	1062944410	HV2a3
Arm_rec	1062944266	H14b
Arm_rec	1062943689	H
Arm_rec	1062943475	U3b2
Arm_rec	1062943333	T1b4
Arm_rec	1062943157	K1a28
Arm_rec	1062942973	H20a2
Arm_rec	1062942743	H80
Arm_rec	1062939300	H20a2
Arm_rec	1062938749	H13c1a
Arm_rec	1062938393	H13a2b4
Arm_rec	1062938015	H5f
Arm_rec	1062937699	H13a2b4
Arm_rec	1062937615	U4b3
Arm_rec	1062937350	H3ak
Arm_rec	1062936156	K1a2
Arm_rec	1062935472	H
Arm_rec	1062935251	H
Arm_rec	1062934944	H3ak
Arm_rec	1062934711	H20a
Arm_rec	1053099185	H29
Arm_rec	1053099171	H5
Arm_rec	1053099157	H13a1d
Arm_rec	1053099143	H8c
Arm_rec	1053099129	H
Arm_rec	1053099115	H11
Arm_rec	1053099101	R2b
Arm_rec	1051608649	T1a2
Arm_rec	1051608551	H
Arm_rec	1051608459	W7
Arm_rec	208436447	T2a2
Arm_rec	207081500	I1b
Arm_rec	204305275	HV1a1b
Arm_rec	357198703	HV1a1a
Arm_rec	346682804	J1b2
Arm_rec	346682776	H15b2
Arm_rec	346682748	J1c2
Arm_rec	346682734	U3b
Arm_rec	345549300	H4
Arm_rec	345549161	K1a2
Arm_rec	345549058	U4b1b1
Arm_rec	345099112	H1u2
Arm_rec	343806186	J1b4a1
Arm_rec	341667487	N2a
Arm_rec	335893018	K1a4b1
Arm_rec	335058302	H28
Arm_rec	335058274	HV12a1
Arm_rec	335058204	T1a2
Arm_rec	334851366	K1a1b
Arm_rec	333951356	H8a1
Arm_rec	333034313	J1b1b1b
Arm_rec	332692101	J1b1b1
Arm_rec	332167315	K1a
Arm_rec	332167189	H8a1
Arm_rec	332167175	N2a
Arm_rec	332167077	H7b1
Arm_rec	332167021	H15b2
Arm_rec	327555523	HV13b
Arm_rec	169211376	W6c1a
Arm_rec	324310538	HV1
Arm_rec	324310482	HV1a2b
Arm_rec	323302311	I7
Arm_rec	323302297	J1d1a1a
Arm_rec	323302283	K1a28
Arm_rec	322394371	N1b1a7
Arm_rec	322394357	W6
Arm_rec	322394343	J1b1a3
Arm_rec	321268959	J1b8
Arm_rec	319412636	H5
Arm_rec	317017881	W7
Arm_rec	317017839	HV12a1
Arm_rec	315271863	J2b1f
Arm_rec	313260072	V15
Arm_rec	313259044	T2b
Arm_rec	313251080	J1b4a2
Arm_rec	312231713	R1a1
Arm_rec	312231671	X4
Arm_rec	312231657	K1a4c1
Arm_rec	312231615	U5a1a2a
Arm_rec	312231573	X2i
Arm_rec	310693508	N1b1a2
Arm_rec	310693494	U3a
Arm_rec	310691360	K1a4c1
Arm_rec	310691318	HV19
Arm_rec	309400089	HV1b3a
Arm_rec	308194810	U1b1
Arm_rec	308194796	J1d2a
Arm_rec	308194712	N1b1a2a
Arm_rec	307695499	U3b2a1a
Arm_rec	307695406	N1b1a
Arm_rec	307695392	HV21
Arm_rec	307695364	T2f2
Arm_rec	306995733	H13c2
Arm_rec	303325352	HV8
Arm_rec	303325310	F1b1f
Arm_rec	302375921	HV12b1
Arm_rec	302375907	J1b1b1
Arm_rec	302375893	H
Arm_rec	302375879	U5a1g1
Arm_rec	302375865	T2a1
Arm_rec	302375851	J1d1b1
Arm_rec	302375837	J1b1a2a
Arm_rec	302375823	HV9c
Arm_rec	302375809	U7a4
Arm_rec	302375795	U4a1
Arm_rec	302375781	T1a2b
Arm_rec	302375767	J1c2
Arm_rec	302375753	U3b2c
Arm_rec	302375739	U1b2
Arm_rec	302375725	H2a3
Arm_rec	302375711	U3b2
Arm_rec	302375697	U4a2a
Arm_rec	302375683	N1b1a2
Arm_rec	302375669	H7b1
Arm_rec	302375655	T2f
Arm_rec	302375641	J1b9
Arm_rec	302375627	X2c
Arm_rec	302375613	K1b2a
Arm_rec	302375599	K1a
Arm_rec	302375585	HV1a1
Arm_rec	302375571	H
Arm_rec	302375557	U8b1a1
Arm_rec	302375543	X2e1b
Arm_rec	302375529	H13a2b1
Arm_rec	302375515	X2f1
Arm_rec	302320846	HV1b3a
Arm_rec	302320832	J1b4a2
Arm_rec	302320818	HV2a1
Arm_rec	302320776	R1b1
Arm_rec	301025148	J1c
Arm_rec	301022045	H26b
Arm_rec	300218095	J1b3a
Arm_rec	299834767	HV1a1a
Arm_rec	298677276	I1a
Arm_rec	297748059	J1d4
Arm_rec	269996148	H13b1a
Arm_rec	1043198968	H6b1
Arm_rec	1043198954	H7f
Arm_rec	1043198940	R0a
Arm_rec	1043198926	U3b
Arm_rec	1043198912	T1a2
Arm_rec	1043198898	T2g1a
Arm_rec	1043198884	U4d
Arm_rec	1043189538	HV0f
Arm_rec	1043189524	I4a
Arm_rec	1043189426	U3a3
Arm_rec	1043189412	T2
Arm_rec	1043189398	T1a5
Arm_rec	1043189384	H3g
Arm_rec	1041579501	U1a1a
Arm_rec	1041579445	H8a
Arm_rec	1041579431	T2b
Arm_rec	1041579417	X4
Arm_rec	1041579403	U3b3
Arm_rec	1040333940	H14b3
Arm_rec	1040333926	J1b
Arm_rec	1040333912	U1a1a
Arm_rec	1040333898	H5n
Arm_rec	1036141163	K1a1
Arm_rec	1036141119	H5m
Arm_rec	1036141105	H1ap1
Arm_rec	1036141091	H47
Arm_rec	1036141077	H13b1a
Arm_rec	1036141063	C5c1
Arm_rec	1036141049	T2h
Arm_rec	1036141035	W6c1a
Arm_rec	1034467193	H5u
Arm_rec	1034467179	U5a1a1
Arm_rec	1034467137	HV1a1
Arm_rec	1034467123	J1c15
Arm_rec	1034467109	T1b4
Arm_rec	1034467095	H5
Arm_rec	1027946614	H13a2c
Arm_rec	1027946642	J1c17
Arm_rec	1027946628	H
Arm_rec	1027946600	H47
Arm_rec	1027946586	H13a2b4
Arm_rec	1027946572	H1ca
Arm_rec	1027946558	K1a12a
Arm_rec	1027946544	X2f1
Arm_rec	1027946530	HV1a'b'c
Arm_rec	1027946516	K1a4c1
Arm_rec	1018267975	HV12a
Arm_rec	751145573	I5b1
Arm_rec	346682762	I4a
Arm_rec	647985150	I1b
Arm_rec	628824033	H13a2b2
Arm_rec	608788822	I2
Arm_rec	576938093	J1b4
Arm_rec	519128455	K1a4h1
Arm_rec	519128329	H3ao
Arm_rec	519128287	I1a
Arm_rec	519127825	J1b5a
Arm_rec	519126887	K1a4j1
Arm_rec	519126509	HV1b3b
Arm_rec	519125977	HV18
Arm_rec	519125907	J1b3
Arm_rec	519125613	H2a1i
Arm_rec	519125025	U1a1a1
Arm_rec	552099634	W6c1
Arm_rec	552099394	HV21
Arm_rec	512392151	N1a3a
Arm_rec	427338172	U6a2c
Arm_rec	385253860	J1c7
Arm_rec	118122808	H14a
Arm_rec	MF362783.1	J2a2b2
Arm_rec	MF362781.1	T1a9
Arm_rec	MF362782.1	U7a4a1
Arm_rec	MF362758.1	H28
Arm_rec	MF362756.1	U1a1b
Arm_rec	MF362754.1	L0a
Arm_rec	MF362753.1	J1b2
Arm_rec	MF362752.1	W3a1
Arm_rec	MF362750.1	J1b2
Arm_rec	MF362749.1	T1b
Arm_rec	MF362748.1	T1a9
Arm_rec	MF362747.1	HV0f
Arm_rec	MF362745.1	W7
Arm_rec	MF362744.1	X2i
Arm_rec	MF362780.1	U1b1
Arm_rec	MF362773.1	K1a8b
Arm_rec	MF362772.1	U7a4a1
Arm_rec	MF362771.1	T1a9
Arm_rec	MF362817.1	K1a27
Arm_rec	MF362816.1	U7a
Arm_rec	MF362815.1	H20a2
Arm_rec	MF362814.1	J1b2
Arm_rec	MF362813.1	H20a2
Arm_rec	MF362812.1	T2
Arm_rec	MF362811.1	U3a3
Arm_rec	MF362810.1	K1b1a
Arm_rec	MF362809.1	J1b1b1
Arm_rec	MF362808.1	T2b
Arm_rec	MF362807.1	W6
Arm_rec	MF362806.1	K1a2a
Arm_rec	MF362805.1	T2a3
Arm_rec	MF362804.1	H14a
Arm_rec	MF362803.1	H50
Arm_rec	MF362802.1	H14a
Arm_rec	MF362801.1	J1d5
Arm_rec	MF362800.1	HV21
Arm_rec	MF362799.1	U3a3
Arm_rec	MF362798.1	H
Arm_rec	MF362797.1	U3b2
Arm_rec	MF362796.1	HV12b1
Arm_rec	MF362795.1	H5u
Arm_rec	MF362794.1	N1b1a2
Arm_rec	MF362793.1	U2d2a
Arm_rec	MF362792.1	R2b1
Arm_rec	MF362791.1	H50
Arm_rec	MF362790.1	HV2a1
Arm_rec	MF362789.1	J1b1a1e
Arm_rec	MF362788.1	K1a12a1a
Arm_rec	MF362787.1	U1b1
Arm_rec	MF362786.1	H13a2a
Arm_rec	MF362785.1	H15a1
Arm_rec	MF362784.1	HV4b
Arm_rec	MF362818.1	N1a3a
Arm_rec	MF362819.1	U1a1a
Arm_rec	MF362820.1	X2i1
Arm_rec	MF362821.1	U4c1
Arm_rec	MF362822.1	H20
Arm_rec	MF362823.1	H6b2
Arm_rec	MF362824.1	U3b2c
Arm_rec	MF362825.1	H11a2a2
Arm_rec	MF362826.1	H6a1b
Arm_rec	MF362827.1	H15b
Arm_rec	MF362828.1	T2a3
Arm_rec	MF362829.1	N1b1a
Arm_rec	MF362830.1	N1a3a
Arm_rec	MF362831.1	H20a
Arm_rec	MF362832.1	H3ar
Arm_rec	MF362833.1	H5
Arm_rec	MF362834.1	HV8
Arm_rec	MF362835.1	K1a27
Arm_rec	MF362836.1	X2m'n
Arm_rec	MF362837.1	J1b1b1
Arm_rec	MF362838.1	U7
Arm_rec	MF362839.1	H87
Arm_rec	MF362840.1	J1d1b1
Arm_rec	MF362841.1	J1d2a
Arm_rec	MF362842.1	J1b5
Arm_rec	MF362843.1	H5m
Arm_rec	MF362844.1	W3b
Arm_rec	MF362845.1	HV
Arm_rec	MF362846.1	H
Arm_rec	MF362847.1	X2i1
Arm_rec	MF362848.1	HV14a
Arm_rec	MF362849.1	HV2a1
Arm_rec	MF362850.1	T2
Arm_rec	MF362851.1	J1d3a
Arm_rec	MF362852.1	N1b1a
Arm_rec	MF362853.1	J2a1a1e
Arm_rec	MF362854.1	HV1b3b
Arm_rec	MF362855.1	J2a1a1e
Arm_rec	MF362856.1	H20a2
Arm_rec	MF362857.1	H15a1
Arm_rec	MF362858.1	H14b3
Arm_rec	MF362859.1	D4b2b6
Arm_rec	MF362860.1	U5a1b
Arm_rec	MF362861.1	HV1a1a
Arm_rec	MF362862.1	T1a1
Arm_rec	MF362863.1	H50
Arm_rec	MF362864.1	H102
Arm_rec	MF362865.1	H29a
Arm_rec	MF362866.1	H2a1n
Arm_rec	MF362867.1	W3b
Arm_rec	MF362868.1	I4a
Arm_rec	MF362869.1	I1b
Arm_rec	MF362870.1	J1b4
Arm_rec	MF362871.1	K1a29
Arm_rec	MF362872.1	U7a3a
Arm_rec	MF362873.1	U2e1a1
Arm_rec	MF362874.1	H13a2b2
Arm_rec	MF362875.1	N1b1a
Arm_rec	MF362876.1	HV18
Arm_rec	MF362877.1	U1a1a1
Arm_rec	MF362878.1	U3a3
Arm_rec	MF362879.1	I5c
Arm_rec	MF362880.1	R0a2j
Arm_rec	MF362881.1	T1b3
Arm_rec	MF362882.1	U8b1a1
Arm_rec	MF362883.1	J1b2a
Arm_rec	MF362884.1	N1b1a
Arm_rec	MF362885.1	T1b
Arm_rec	MF362886.1	T1b3
Arm_rec	MF362887.1	J1b
Arm_rec	MF362888.1	H5
Arm_rec	MF362889.1	U2e1a1
Arm_rec	MF362890.1	H14a1
Arm_rec	MF362891.1	U3b3
Arm_rec	MF362892.1	T2h
Arm_rec	MF362893.1	T2h
Arm_rec	MF362894.1	H8a1
Arm_rec	MF362895.1	W6
Arm_rec	MF362896.1	T1b
Arm_rec	MF362897.1	H13a2b4
Arm_rec	MF362898.1	T2h
Arm_rec	MF362899.1	X4
Arm_rec	MF362900.1	U1b2
Arm_rec	MF362901.1	X2e2a2
Arm_rec	MF362902.1	H13a1d
Arm_rec	MF362903.1	T2c1a
Arm_rec	MF362904.1	I5c
Arm_rec	MF362905.1	T2e
Arm_rec	MF362906.1	N1a3a2
Arm_rec	MF362907.1	K1a4i
Arm_rec	MF362908.1	H4a2
Arm_rec	MF362909.1	T2n
Arm_rec	MF362910.1	J1b5
Arm_rec	MF362911.1	U1a1b
Arm_rec	MF362912.1	HV18
Arm_rec	MF362913.1	HV4a2
Arm_rec	MF362914.1	H20a2
Arm_rec	MF362915.1	U1a1
Arm_rec	MF362916.1	H28
Arm_rec	MF362917.1	U3b
Arm_rec	MF362918.1	U3b2a1a
Arm_rec	MF362919.1	U3b
Arm_rec	MF362920.1	H33
Arm_rec	MF362921.1	J1b5
Arm_rec	MF362922.1	U2e2
Arm_rec	MF362923.1	X2f
Arm_rec	MF362924.1	H66a
Arm_rec	MF362925.1	K1a19
Arm_rec	MF362926.1	U5b1b1
Arm_rec	MF362927.1	W6
Arm_rec	MF362928.1	T2b
Arm_rec	MF362929.1	U8b1b1
Arm_rec	MF362930.1	H28
Arm_rec	MF362931.1	T2n
Arm_rec	MF362932.1	H15a1
Arm_rec	MF362933.1	K1a4i
Arm_rec	MF362934.1	H
Arm_rec	MF362935.1	U8b1b1
Arm_rec	MF362936.1	H51
Arm_rec	MF362937.1	H15a1
Arm_rec	MF362938.1	H5m
Arm_rec	MF362939.1	K1a4c1
Arm_rec	MF362940.1	H8a1
Arm_rec	MF362941.1	T1b
Arm_rec	MF362942.1	H2a
Arm_rec	MF362943.1	X2e2a2
Arm_rec	MF362944.1	I5a3
Arm_rec	MF362945.1	X2f
Arm_rec	MF362946.1	K1b1c
Arm_rec	MF362947.1	T2c1c
Arm_rec	MF362948.1	K1b1c
Arm_rec	MF362949.1	I2'3
Arm_rec	MF362757.1	H50
Arm_rec	MF362779.1	H
Arm_rec	MF362774.1	N1b1a2
Arm_rec	MF362775.1	H
Arm_rec	MF362776.1	T1a9
Arm_rec	MF362777.1	HV0f
Arm_rec	MF362778.1	K1b1c
Arm_rec	MF362759.1	H
Arm_rec	MF362760.1	H28
Arm_rec	MF362761.1	T1
Arm_rec	MF362762.1	T1a
Arm_rec	MF362763.1	J2a2b2
Arm_rec	MF362764.1	HV21
Arm_rec	MF362765.1	X2e2a2
Arm_rec	MF362766.1	I2
Arm_rec	MF362767.1	T1a2
Arm_rec	MF362768.1	U8b1b2
Arm_rec	MF362769.1	H15a1
Arm_rec	MF362770.1	N1b1a2
Arm_rec	MF362755.1	H
Arm_rec	MF362751.1	T2
Arm_rec	MF362746.1	U3b
Aze_rec	302376341	U5a1
Aze_rec	302376327	X2e1a
Aze_rec	302376313	T2b3
Aze_rec	302376299	K1b1c
Aze_rec	302376285	F1b1f
Aze_rec	302376271	T2k
Aze_rec	302376257	C5a2a
Aze_rec	302376243	T2a3
Aze_rec	302376229	M7c1a1b
Aze_rec	302376215	HV2a1
Aze_rec	302376201	K1a29a
Aze_rec	302376187	M1a1e2
Aze_rec	302376173	U3c
Aze_rec	302376159	T2b4e
Aze_rec	302376145	U7a
Aze_rec	302376131	D4b1a2a1
Aze_rec	302376117	X2
Aze_rec	302376103	T1a1b1
Aze_rec	302376089	U3c
Aze_rec	302376075	T2h
Aze_rec	302376061	H
Aze_rec	302376047	F1b1f
Aze_rec	302376033	J1c15a1
Aze_rec	302376019	HV9c
Aze_rec	302376005	U7a4a1
Aze_rec	302375991	U1a1
Aze_rec	302375977	U1a2
Aze_rec	302375963	U7a4a1a
Aze_rec	302375949	H
Aze_rec	302375935	R1a1
Aze_rec	995896724	R0b
Aze_rec	683416744	HV1a1
Aze_rec	519129001	U1b2
Aze_rec	519128805	I2
Aze_rec	519128721	T2n
Aze_rec	519128371	T2
Aze_rec	519128147	U2e2
Aze_rec	519127699	H29a
Aze_rec	519127447	G2a3
Aze_rec	519127041	N1a3a
Aze_rec	519126901	X2f
Aze_rec	519126607	U1a1c1d
Aze_rec	519126425	T2a3
Aze_rec	519126383	X2f
Aze_rec	519126229	H20a1
Aze_rec	519126159	H5f
Aze_rec	519126131	T2b34
Aze_rec	519126061	K1a4
Aze_rec	519124857	C4a1
Aze_rec	519124731	N1a3
Aze_rec	519124633	J1d6
Aze_rec	519124535	K1a31
Aze_rec	519124255	H15a1a1
Aze_rec	519124143	H49b
Aze_rec	530848009	W1
Aze_rec	530847757	I5b1
Aze_rec	385257878	T2
Aze_rec	385256814	T2a1b2b
Aze_rec	385256506	T1a8b
Aze_rec	385256142	T1a13
Aze_rec	385255666	T1
Aze_rec	385254252	J1c16
Aze_rec	373445480	W3b1
Aze_rec	373445466	X2
Aze_rec	373445452	X2
Bel_rec	1060914772	H7c2
Bel_rec	1049307003	C4a1a
Bel_rec	1049306989	C4a1a
Bel_rec	1049306975	D2b1
Bel_rec	1049306961	D4g1b
Bel_rec	1049306947	D4j12
Bel_rec	1049306933	G2a1
Bel_rec	1049306919	C4a1a
Bel_rec	1049306905	D4j3
Bel_rec	1049306891	D4j12
Bel_rec	1049306877	G2a1
Bel_rec	1049306863	G2a1
Bel_rec	306490734	H1b5
Bel_rec	159459935	H1e4a
Bel_rec	157267377	M33c
Bel_rec	308522873	U4c1
Bel_rec	308522872	U4a2c
Bel_rec	308522849	U4a1a1
Bel_rec	308522848	U4a2
Bel_rec	308522836	U4b1a2a
Bel_rec	297748073	K2a2a1
Bel_rec	283048559	U5b2a2b
Bel_rec	283048545	U5a2b1d
Bel_rec	283048531	U5a1d2a1
Bel_rec	283048517	U5b1b1a
Bel_rec	283048503	U5a2b1
Bel_rec	283048489	U5a1a1b
Bel_rec	283048475	U5a2b1a
Bel_rec	283048461	U5a2a1c
Bel_rec	283048447	U5a1b1b1
Bel_rec	283048433	U5a2e
Bel_rec	283047523	U5a1a1
Bel_rec	283047509	U5b1h
Bel_rec	283047495	U5a1a1a
Bel_rec	283047481	U5a2a1
Bel_rec	283047467	U5b1b1a
Bel_rec	283047453	U5a2b1
Bel_rec	227336813	K1a1b1a
Bel_rec	690196361	HV2a2
Bel_rec	683417892	U3a2a
Bel_rec	683416478	U2e1b1
Bel_rec	683416394	U2e1b1
Bel_rec	683416366	U2e2a1a
Bel_rec	683416142	U3b1b
Bel_rec	683416072	U3b1b
Bel_rec	683416016	U2e2a1d
Bel_rec	683415960	U2e1a1
Bel_rec	683415946	U2e2a1a
Bel_rec	683415918	U3b1b
Bel_rec	683415722	U2e1a1
Bel_rec	512392459	N3a
Bel_rec	512392137	N1a3
Bel_rec	386775523	HV1b2
Bel_rec	88942033	HV5a
Bel_rec	385254014	J1c7a
Bel_rec	385254000	J1c7a
Bel_rec	385253986	J1c7
Bsq_rec	74475826	K1a1b1
Bsq_rec	74475812	U8a1a1a
Bsq_rec	74475798	U8a1a4
Bsq_rec	74475784	U8a2
Bsq_rec	259019935	HV4a1a
Bsq_rec	259019907	H1r1
Bsq_rec	259019851	H1t1a
Bsq_rec	109289430	M1a3b
Bsq_rec	727354494	X2c1
Bsq_rec	556714065	J1c5c1
Bsq_rec	556714051	K1a4a1e
Bsq_rec	556714037	T1a1p
Bsq_rec	556714023	HV0
Bsq_rec	556714009	H1t1a
Bsq_rec	556713995	H5j
Bsq_rec	556713981	V1a
Bsq_rec	556713967	H5a
Bsq_rec	556713953	V22
Bsq_rec	556713939	H1t1a
Bsq_rec	556713925	H3g1
Bsq_rec	556713911	U4a1a
Bsq_rec	556713897	J1c2e2
Bsq_rec	556713883	U5b1f1a
Bsq_rec	556713869	T2b28
Bsq_rec	556713855	H2a5a1a
Bsq_rec	556713841	H1e1a7
Bsq_rec	556713827	J2a1a1e
Bsq_rec	556713813	H1e1a7
Bsq_rec	556713799	K1a1b1
Bsq_rec	556713785	H3c2a
Bsq_rec	556713771	U5b1f1a
Bsq_rec	556713757	H1t1a
Bsq_rec	556713743	U5a1d1
Bsq_rec	375072009	H1j1
Bsq_rec	375071995	H1bb
Bsq_rec	375071981	H1b4
Bsq_rec	375071967	H3z1
Bsq_rec	375071953	H1ar
Bsq_rec	375071939	H3ao
Bsq_rec	375071925	H2a1
Bsq_rec	375071911	H1at
Bsq_rec	375071897	H1e3
Bsq_rec	375071883	H20c
Bsq_rec	375071869	H5a1
Bsq_rec	375071855	H1b
Bsq_rec	375071841	H1j1b
Bsq_rec	375071827	H2a5a1
Bsq_rec	375071813	H1t1a
Bsq_rec	375071799	H1j1b
Bsq_rec	375071785	H1j1
Bsq_rec	375071771	H3
Bsq_rec	375071757	H1c3a
Bsq_rec	375071743	H3s
Bsq_rec	375071729	H1ak2
Bsq_rec	375071715	H3am
Bsq_rec	375071701	H4a1a1a4
Bsq_rec	375071687	H1e3
Bsq_rec	375071673	H1j1a2
Bsq_rec	375071659	H3at1
Bsq_rec	375071645	H1j1a1
Bsq_rec	375071631	H1e1a6
Bsq_rec	375071617	H3c2a
Bsq_rec	375071603	H3at1
Bsq_rec	375071589	H1t1a
Bsq_rec	375071575	H1ak2
Bsq_rec	375071561	H3c2a
Bsq_rec	375071547	H1j1b
Bsq_rec	375071533	H1j1b
Bsq_rec	375071519	H5a3a1
Bsq_rec	375071505	H2a5a1a
Bsq_rec	375071491	H1j1b
Bsq_rec	375071477	H1t1a
Bsq_rec	375071463	H2a1e
Bsq_rec	375071449	H1c3a
Bsq_rec	375071435	H1an1a
Bsq_rec	375071421	H1an1a
Bsq_rec	375071407	H1ak1
Bsq_rec	375071393	H6a1a
Bsq_rec	375071379	H1e1a1
Bsq_rec	375071365	H1t1a
Bsq_rec	375071351	H1bx
Bsq_rec	375071337	H1j1
Bsq_rec	375071323	H1b
Bsq_rec	375071309	H1e1a7
Bsq_rec	375071295	H1ak2
Bsq_rec	375071281	H1j1b
Bsq_rec	375071267	H1e1a1
Bsq_rec	375071253	H8b
Bsq_rec	375071239	H1b4
Bsq_rec	375071225	H1e1a4
Bsq_rec	375071211	H1j1b
Bsq_rec	375071197	H1t1
Bsq_rec	375071183	H1a
Bsq_rec	375071169	H24b
Bsq_rec	375071155	H1av1a
Bsq_rec	375071141	H1e1a1
Bsq_rec	375071127	H42a1
Bsq_rec	375071113	H1c4a1
Bsq_rec	375071099	H1j1a2
Bsq_rec	375071085	H5a3a1
Bsq_rec	375071071	H59
Bsq_rec	375071057	H1a3
Bsq_rec	375071043	H1t1a
Bsq_rec	375071029	H1j1
Bsq_rec	375071015	H1j1c
Bsq_rec	375071001	H1j1c
Bsq_rec	375070987	H1ak2
Bsq_rec	375070973	H5j
Bsq_rec	375070959	H1j1
Bsq_rec	375070945	H1j1
Bsq_rec	375070931	H3e
Bsq_rec	375070917	H1j1
Bsq_rec	375070903	H1t1a
Bsq_rec	375070889	H4a1a1a4
Bsq_rec	375070875	H3c2a
Bsq_rec	375070861	H2a5a1a
Bsq_rec	375070847	H1av1a
Bsq_rec	375070833	H3at1
Bsq_rec	375070819	H1b
Bsq_rec	375070805	H1j1b
Bsq_rec	375070791	H3c2c
Bsq_rec	375070777	H3am
Bsq_rec	375070763	H2a5a1a
Bsq_rec	375070749	H6a1a
Bsq_rec	375070735	H1bx
Bsq_rec	375070721	H1q1a
Bsq_rec	375070707	H1e1a1
Bsq_rec	375070693	H1av1
Bsq_rec	375070679	H1r1
Bsq_rec	375070665	H1b
Bsq_rec	375070651	H1t1a1
Bsq_rec	375070637	H1t1
Bsq_rec	375070623	H1c4a1
Bsq_rec	375070609	H1av1a
Bsq_rec	375070595	H1j1b
Bsq_rec	375070581	H17a
Bsq_rec	375070567	H17a
Bsq_rec	375070553	H1b4
Bsq_rec	375070539	H1av1
Bsq_rec	375070525	H1b4
Bsq_rec	375070511	H3c2a
Bsq_rec	375070497	H3at1
Bsq_rec	375070483	H1j1b
Bsq_rec	375070469	H1t1a
Bsq_rec	375070455	H1r1
Bsq_rec	375070441	H1av1a
Bsq_rec	375070427	H1av1
Bsq_rec	375070413	H3
Bsq_rec	375070399	H105a
Bsq_rec	375070385	H1bx
Bsq_rec	375070371	H3
Bsq_rec	375070357	H3x
Bsq_rec	375070343	H1t1a
Bsq_rec	375070329	H1t1a
Bsq_rec	375070315	H3
Bsq_rec	375070301	H1j1a2
Bsq_rec	375070287	H58a
Bsq_rec	375070273	H6a1a7
Bsq_rec	375070259	H9a
Bsq_rec	375070245	H1o
Bsq_rec	375070231	H1j1c
Bsq_rec	375070217	H1j1
Bsq_rec	375070203	H3
Bsq_rec	375070189	H1j1
Bsq_rec	375070175	H3k
Bsq_rec	375070161	H1t1a1
Bsq_rec	375070147	H1t1a1
Bsq_rec	375070133	H1t1a1
Bsq_rec	375070119	H1t1a1
Bsq_rec	375070105	H1b1b
Bsq_rec	375070091	H1ak2
Bsq_rec	375070077	H1j1c
Bsq_rec	375070063	H1j1b
Bsq_rec	375070049	H76a
Bsq_rec	375070035	H3af
Bsq_rec	375070021	H1j1
Bsq_rec	375070007	H24b
Bsq_rec	375069993	H3c2c
Bsq_rec	375069979	H3
Bsq_rec	375069965	H
Bsq_rec	375069951	H58a
Bsq_rec	375069937	H1c4a1
Bsq_rec	375069923	H1j1b
Bsq_rec	375069909	H3c2a
Bsq_rec	375069895	H1t1a1
Bsq_rec	375069881	H3ab
Bsq_rec	375069867	H1ak2
Bsq_rec	375069853	H2a5a1a
Bsq_rec	375069839	H1an1a
Bsq_rec	375069825	H1c4a1
Bsq_rec	375069811	H1bv1
Bsq_rec	375069797	H1e3
Bsq_rec	375069783	H3c2a1
Bsq_rec	375069769	H5a3a1
Bsq_rec	375069755	H3
Bsq_rec	375069741	H1an1a
Bsq_rec	375069727	H2a5a1a
Bsq_rec	375069713	H1e1a2
Bsq_rec	375069699	H1t1a
Bsq_rec	375069685	H3ai
Bsq_rec	375069671	H1av1
Bsq_rec	375069657	H3
Bsq_rec	375069643	H1e1a1
Bsq_rec	375069629	H1ab1
Bsq_rec	375069615	H2a5a1
Bsq_rec	375069601	H1j1
Bsq_rec	375069587	H6a1b2d
Bsq_rec	375069573	H2a5a1
Bsq_rec	375069559	H1j1c
Bsq_rec	375069545	H4a1a1a4
Bsq_rec	375069531	H2a5a1a
Bsq_rec	375069517	H3
Bsq_rec	375069503	H1e1a4
Bsq_rec	375069489	H1b
Bsq_rec	375069475	H1j1a
Bsq_rec	375069461	H1b1
Bsq_rec	375069447	H1t1a
Bsq_rec	375069433	H1e1a
Bsq_rec	375069419	H15a1b
Bsq_rec	375069405	H15a1b
Bsq_rec	375069391	H1t1a1
Bsq_rec	375069377	H1t1a
Bsq_rec	375069363	H1t1a
Bsq_rec	375069349	H108
Bsq_rec	375069335	H2a5a1a
Bsq_rec	375069321	H1j1a
Bsq_rec	375069307	H1e3
Bsq_rec	375069293	H42a1
Bsq_rec	375069279	H3am
Bsq_rec	375069265	H1c16
Bsq_rec	375069251	H2a1
Bsq_rec	375069237	H1e1a4
Bsq_rec	375069223	H1j1a
Bsq_rec	375069209	H3at1
Bsq_rec	375069195	H42a1
Bsq_rec	375069181	H2a1
Bsq_rec	375069167	H1
Bsq_rec	375069153	H3c2a1
Bsq_rec	375069139	H6a1a7
Bsq_rec	375069125	H3
Bsq_rec	375069111	H1t1
Bsq_rec	375069097	H81
Bsq_rec	375069083	H1t1a
Bsq_rec	375069069	H5a3a1
Bsq_rec	375069055	H5a3a1
Bsq_rec	375069041	H1bv1
Bsq_rec	375069027	H1j1a
Bsq_rec	375069013	H1e3
Bsq_rec	375068999	H1e3
Bsq_rec	375068985	H1av1
Bsq_rec	375068971	H3
Bsq_rec	375068957	H1av1
Bsq_rec	375068943	H3
Bsq_rec	375068929	H1e1a1
Bsq_rec	375068915	H1
Bsq_rec	375068901	H1aw1
Bsq_rec	375068887	H42a1
Bsq_rec	375068873	H3c2a1
Bsq_rec	375068859	H1ah1
Bsq_rec	375068845	H1av1
Bsq_rec	375068831	H1ah1
Bsq_rec	375068817	H17
Bsq_rec	375068803	H5a3a1
Bsq_rec	375068789	H1j1
Bsq_rec	375068775	H3c2c
Bsq_rec	375068761	H2a5a1a
Bsq_rec	375068747	H4a1a4a
Bsq_rec	375068733	H1an2
Bsq_rec	375068719	H1av1
Bsq_rec	375068705	H4a1a1a1a
Bsq_rec	375068691	H1j1b
Bsq_rec	375068677	H108
Bsq_rec	375068663	H24
Bsq_rec	375068649	H3c
Bsq_rec	375068635	H3c2a
Bsq_rec	375068621	H5a3a1
Bsq_rec	375068607	H3
Bsq_rec	375068593	H1e1a4
Bsq_rec	375068579	H1e1a7
Bsq_rec	375068565	H1e1a1
Bsq_rec	375068551	H1t1a
Bsq_rec	375068537	H3av
Bsq_rec	375068523	H1j1
Bsq_rec	375068509	H2a1
Bsq_rec	375068495	H20c
Bsq_rec	375068481	H1e1a1
Bsq_rec	375068467	H42a1
Bsq_rec	375068453	H1t1a
Bsq_rec	375068439	H2a5a1a
Bsq_rec	375068425	H2a5a1a
Bsq_rec	375068411	H53
Bsq_rec	375068397	H2a5a1
Bsq_rec	375068383	H6a1b2d
Bsq_rec	375068369	H2a5a1a
Bsq_rec	375068355	H1t1a
Bsq_rec	375068341	H2a5a1
Bsq_rec	375068327	H1av1
Bsq_rec	375068313	H29
Bsq_rec	375068299	H1cd
Bsq_rec	375068285	H1c
Bsq_rec	375068271	H3
Bsq_rec	375068257	H1e1a
Bsq_rec	375068243	H3ab
Bsq_rec	375068229	H3y
Bsq_rec	375068215	H1i1
Bsq_rec	375068201	H5a3a1
Bsq_rec	375068187	H1bq
Bsq_rec	375068173	H5e
Bsq_rec	375068159	H1j2a
Bsq_rec	375068145	H1e1a1
Bsq_rec	375068131	H1j1a
Bsq_rec	375068117	H1j1a2
Bsq_rec	375068103	H1j1b
Bsq_rec	375068089	H1o
Bsq_rec	375068075	H2a5a1
Bsq_rec	375068061	H1e1a1
Bsq_rec	375068047	H3c2a
Bsq_rec	375068033	H2a5a1
Bsq_rec	375068019	H1j1a1
Bsq_rec	375068005	H1b
Bsq_rec	375067991	H14b1
Bsq_rec	375067977	H49a2
Bsq_rec	375067963	H1ak2
Bsq_rec	375067949	H3c2a
Bsq_rec	375067935	H1t1a
Bsq_rec	375067921	H1
Bsq_rec	375067907	H3av
Bsq_rec	375067893	H30b1
Bsq_rec	375067879	H3at
Bsq_rec	375067865	H3n
Bsq_rec	375067851	H3ah
Bsq_rec	375067837	H42a1
Bsq_rec	375067823	H1v
Bsq_rec	375067809	H3av
Bsq_rec	375067795	H3am
Bsq_rec	375067781	H1bs
Bsq_rec	375067767	H2a5a1a
Bsq_rec	375067753	H1t1a
Bsq_rec	375067739	H3am
Bsq_rec	375067725	H3c2a
Bsq_rec	375067711	H42a
Bsq_rec	375067697	H1bx
Bsq_rec	375067683	H1q
Bsq_rec	375067669	H27
Bsq_rec	375067655	H1t1a
Bsq_rec	375067641	H6a1a
Bsq_rec	375067627	H
Bsq_rec	375067613	H3
Bsq_rec	375067599	H3c2a
Bsq_rec	375067585	H1an2
Bsq_rec	375067571	H3c
Bsq_rec	375067557	H3ab
Bsq_rec	375067543	H3c2a
Bsq_rec	375067529	H1j1
Bsq_rec	375067515	H1aq
Bsq_rec	375067501	H3y
Bsq_rec	375067487	H3
Bsq_rec	375067473	H5'36
Bsq_rec	375067459	H3
Bsq_rec	375067445	H1t1a
Bsq_rec	375067431	H14b1
Bsq_rec	375067417	H1j1a
Bsq_rec	375067403	H2a5a1
Bsq_rec	375067389	H1av1a
Bsq_rec	375067375	H1j1b
Bsq_rec	375067361	H86
Bsq_rec	375067347	H1av1a
Bsq_rec	375067333	H6a1a
Bsq_rec	375067319	H53
Bsq_rec	375067305	H1j1a1
Bsq_rec	375067291	H13a1a1
Bsq_rec	375067277	H10
Bsq_rec	375067263	H5s
Bsq_rec	375067249	H74
Bsq_rec	375067235	H1o
Bsq_rec	375067221	H1
Bsq_rec	375067207	H4a1a
Bsq_rec	375067193	H4a1
Bsq_rec	375067179	H1
Bsq_rec	375067165	H1t1a
Bsq_rec	375067151	H1o
Bsq_rec	375067137	H30b1
Bsq_rec	375067123	H3h7
Bsq_rec	375067109	H3av
Bsq_rec	375067095	H1bf1
Bsq_rec	375067081	H13a1a1
Bsq_rec	375067067	H2a5a1
Bsq_rec	375067053	H27
Bsq_rec	375067039	H1q2
Bsq_rec	375067025	H1e1a1
Bsq_rec	375067011	H74
Bsq_rec	375066997	H1e1a1
Bsq_rec	375066983	H1
Bsq_rec	375066969	H3
Bsq_rec	375066955	H3
Bsq_rec	375066941	H7d3
Bsq_rec	375066927	H3au
Bsq_rec	375066913	H30b1
Bsq_rec	375066899	H104
Bsq_rec	375066885	H1a1
Bsq_rec	375066871	H6a1a2b
Bsq_rec	375066857	H3ao
Bsq_rec	375066843	H3av
Bsq_rec	375066829	H1
Bsq_rec	375066815	H5s
Bsq_rec	375066801	H1j1
Bsq_rec	375066787	H1aq
Bsq_rec	375066773	H1ag1
Bsq_rec	375066759	H1j1a
Bsq_rec	375066745	H3h6
Bsq_rec	375066731	H4a1
Bsq_rec	375066717	H1av1
Bsq_rec	375066703	H53
Bsq_rec	375066689	H2a5a1
Bsq_rec	375066675	H1j1
Bsq_rec	375066661	H24
Bsq_rec	375066647	H1av1a
Bsq_rec	375066633	H1t1a
Bsq_rec	375066619	H58a
Bsq_rec	375066605	H5a1
Bsq_rec	375066591	H67a
Bsq_rec	375066577	H14b1
Bsq_rec	375066563	H4a1a4b
Bsq_rec	375066549	H5a5
Bsq_rec	375066535	H51
Bsq_rec	375066521	H1t1a
Bsq_rec	375066507	H1a3a4
Bsq_rec	375066493	H6a2
Bsq_rec	375066479	H3n
Bsq_rec	375066465	H1j1a2
Bsq_rec	375066451	H13a1a1
Bsq_rec	375066437	H3x
Bsq_rec	375066423	H1av1
Bsq_rec	375066409	H1q2
Bsq_rec	375066395	H87
Bsq_rec	375066381	H15a1b
Bsq_rec	375066367	H42a1
Bsq_rec	375066353	H13a1a1
Bsq_rec	375066339	H1c4a1
Bsq_rec	375066325	H1an1a
Bsq_rec	375066311	H3
Bsq_rec	375066297	H13a1a1
Bsq_rec	375066283	H5
Bsq_rec	375066269	H1j1
Bsq_rec	375066255	H1e1a2
Bsq_rec	375066241	H1
Bsq_rec	375066227	H4a1a4a
Bsq_rec	375066213	H1
Bsq_rec	375066199	H1a1
Bsq_rec	375066185	H3
Bsq_rec	375066171	H7d2
Bsq_rec	375066157	H1ab1
Bsq_rec	375066143	H1ab1
Bul_rec	292597318	H1b1a
Bul_rec	237652993	U5b3e
Bul_rec	1031620983	T2b
Bul_rec	1031620955	T2b21
Bul_rec	1024312140	H1a1
Bul_rec	1024312126	L2a1k
Bul_rec	1018267807	H7b1
Bul_rec	1018267765	H56a1
Bul_rec	1007475583	H2a1i
Bul_rec	1007475429	V1a1b
Bul_rec	1007475163	H1ap1
Bul_rec	1004818400	T2b
Bul_rec	1001887157	X2e1a
Bul_rec	1001886902	H44b
Bul_rec	998491644	U5a2b
Bul_rec	998491628	H14a2a
Bul_rec	883741357	R0a2
Bul_rec	933907744	H2a2a1
Bul_rec	930575977	H44b
Bul_rec	928505970	H7c1
Bul_rec	927226588	K1a4
Bul_rec	817037135	T1a1l
Bul_rec	788238569	H1c7
Bul_rec	765525261	U4a1a
Bul_rec	758742559	T1a
Bul_rec	333034411	T2
Bul_rec	745844935	U4c1
Bul_rec	753363825	U4c1
Bul_rec	751145559	R1b1
Bul_rec	745844921	R1a1a
Bul_rec	729236409	H3af
Bul_rec	704198048	W1c
Bul_rec	635544426	T2a1
Bul_rec	615028701	I
Bul_rec	601068948	T1a1l
Bul_rec	576937995	W1i
Bul_rec	530926820	H6a1a
Bul_rec	520688785	H13a1d
Bul_rec	520688701	H4a1c2
Bul_rec	462117263	H13a1c
Bul_rec	462117179	HV
Bul_rec	462116942	HV4
Bul_rec	385253426	J1c2e1
Bul_rec	373446404	I5a1
Bul_rec	373445508	W3b
Bul_rec	373445494	N1b1a8
Bur_rec	1049307073	G2a1
Bur_rec	1049307031	C4a1a3c
Bur_rec	168251685	D4j8
Bur_rec	50295413	B4d1a
Bur_rec	298368061	M9a1a1c1b1a
Bur_rec	229502370	C4b6
Bur_rec	229502356	D4j6
Bur_rec	229502342	D2c
Bur_rec	229502328	D4j4a
Bur_rec	229502314	C4a2a1
Bur_rec	229502300	D4j9
Bur_rec	229502286	C4b
Bur_rec	229502272	D4j11
Bur_rec	229502258	D4o
Bur_rec	229502244	D4b2b1
Bur_rec	229502230	D4b2b2c
Bur_rec	229502216	C4b1b
Bur_rec	229502202	C5b1b
Bur_rec	229502188	C4b3a
Bur_rec	229502174	D4c2a
Bur_rec	229502160	D4j1a1
Bur_rec	229502146	D4j7a
Bur_rec	229502132	D4j1a1
Bur_rec	229502118	D4b1a2a1
Bur_rec	229502104	C4a1a4a
Bur_rec	229502090	D4j10
Bur_rec	229502076	D4b1a2a2
Bur_rec	229502062	D4p
Bur_rec	229502048	D4j8
Bur_rec	229502034	D4h4a
Bur_rec	229502020	D4o1a
Bur_rec	229502006	C4a2a1
Bur_rec	229501992	C5a1
Bur_rec	229501978	C5b1a
Bur_rec	229501964	D5a2a1
Bur_rec	229501950	C5a1
Bur_rec	229501936	C4b1
Bur_rec	229501922	C4b1
Bur_rec	229501908	C4a1a6
Bur_rec	229501894	C4b1a
Bur_rec	229501880	C5b1a
Bur_rec	229501866	C5b1
Bur_rec	229501852	D4e5a
Bur_rec	229501838	D4b2b5
Bur_rec	229501824	D4j
Bur_rec	229501810	D4g2b
Bur_rec	229501796	D5a2a
Bur_rec	229501782	D5a2a1
Bur_rec	229501768	D5a2a2
Bur_rec	229501754	C5b1a
Bur_rec	229501740	C4a1a3a
Bur_rec	229501726	C4a1a
Bur_rec	229501712	D4m2a
Bur_rec	229501698	C4b5
Bur_rec	229501684	C4a1a4
Bur_rec	229501670	D4j5a
Bur_rec	229501656	C5a2a
Bur_rec	229501642	D4j8
Bur_rec	124388000	J1b1b1
Bur_rec	119035236	A5c
Bur_rec	119035222	D3
Bur_rec	119035208	A1a1
Bur_rec	119035194	Y2b
Bur_rec	119035180	A8a1
Bur_rec	119035166	D2b1a
Bur_rec	119035152	A
Bur_rec	119035138	A23
Bur_rec	119035124	X2e2a1
Bur_rec	119035110	A1a1
Bur_rec	119035096	A
Bur_rec	119035082	M7c1b1
Bur_rec	119035068	M7b1a1f
Bur_rec	119035054	D2b1a
Bur_rec	119035040	A
Bur_rec	119035026	I4a1
Bur_rec	119035012	N1a1b1
Bur_rec	119034998	A
Bur_rec	119034984	A1a1
Bur_rec	119034970	M7c1b1
Bur_rec	119034956	M7a2a3
Bur_rec	119034942	A16
Bur_rec	119034928	C1a
Bur_rec	119034914	N1a1a1a1a
Bur_rec	119034900	M7b1b
Bur_rec	119034816	A12
Bur_rec	13272654	C4b3b
Bur_rec	914244566	C4b
Bur_rec	683417262	U5b1b1a
Bur_rec	683417248	H1
Bur_rec	683417234	H11a1
Bur_rec	683417220	H3av
Bur_rec	683417206	U4b3
Bur_rec	683417192	U5a2b
Bur_rec	683417178	H8b1
Bur_rec	683417150	H5a1
Bur_rec	683417136	H1g1
Bur_rec	683417122	H1
Bur_rec	683417108	K1a17
Bur_rec	683417094	K1a
Bur_rec	683417080	H11a1
Bur_rec	683417066	H1b1a
Bur_rec	683417052	K1b2a2
Bur_rec	683417038	HV1a1a
Bur_rec	683417024	H1
Bur_rec	683417010	H20a
Bur_rec	683416996	H20a
Bur_rec	683416982	H11a1
Bur_rec	683416968	U5a2b
Bur_rec	683416954	H1h1
Bur_rec	683416926	H1a3b
Bur_rec	683416912	T1a1b
Bur_rec	683416898	H7c1
Bur_rec	683416884	T1a1
Bur_rec	683416870	U1a1a
Bur_rec	683416856	T2h
Bur_rec	683416842	U4a1e
Bur_rec	683416828	U8a1a1b1
Bur_rec	683416814	H49
Bur_rec	683416786	H1b3
Bur_rec	683416772	HV1a1a
Bur_rec	683416758	J1c10a
Bur_rec	356466570	N9a8
Bur_rec	356466556	B4b1a3a
Bur_rec	356466542	B4c1a2
Bur_rec	356466528	M11a
Bur_rec	356466514	N9a3
Bur_rec	356466500	B4b1a3
Bur_rec	356466486	B4c1a2
Bur_rec	356466472	M13a1b1
Bur_rec	356466458	B4c1a2
Bur_rec	356466444	M9a1a1c1b1a
Bur_rec	356466430	B4j
Bur_rec	356466416	B5b2a2
Cau_rec	381277563	K1a19a
Cau_rec	381277423	K1a7
Cau_rec	381277409	K1c2
Cau_rec	1049307255	G2a2
Cau_rec	1049307199	G2a1
Cau_rec	208964675	H1z1
Cau_rec	350284179	H15a1
Cau_rec	333951482	T2b15
Cau_rec	51895204	H3
Cau_rec	51894910	H1e2c
Cau_rec	302377559	X2i
Cau_rec	302377545	N1b1a2
Cau_rec	302377531	U5a1f1
Cau_rec	302377517	T2d2
Cau_rec	302377503	J1b1b
Cau_rec	302377489	U4b1b1
Cau_rec	302377475	X2d1
Cau_rec	302377461	U3a3
Cau_rec	302377447	HV12a
Cau_rec	302377433	N1a3a
Cau_rec	302377419	R1a1b
Cau_rec	302377405	U3a
Cau_rec	302377391	K1a4i
Cau_rec	302377377	H13a1a1
Cau_rec	302377363	H10a1
Cau_rec	302377349	R1a
Cau_rec	302377335	K3
Cau_rec	302377321	U4a2
Cau_rec	302377307	U4b1b1
Cau_rec	302377293	U2'3'4'7'8'9
Cau_rec	302377279	U1a1a1
Cau_rec	302377265	T2i
Cau_rec	302377251	H7
Cau_rec	302377237	T2b
Cau_rec	302377223	H
Cau_rec	302377209	R
Cau_rec	302377195	R2
Cau_rec	302377181	U4
Cau_rec	109289472	M1a1b1b
Cau_rec	13272822	T2e
Cau_rec	883741497	R0a
Cau_rec	821345374	HV4b
Cau_rec	727354298	R2
Cau_rec	683416450	U4a1
Cau_rec	601069140	I2
Cau_rec	519129015	C5c1
Cau_rec	519128217	K1b1c
Cau_rec	519127335	U7a2a
Cau_rec	519124913	F1b1f
Cau_rec	519124073	H13c2
Cau_rec	536862469	W6c1a
Cau_rec	442565713	U1a1a1a
Cau_rec	427338186	M1a1b1b
Cau_rec	427338130	M1a1b1b
Cau_rec	427337836	M1a1b1b
Cau_rec	385257206	T2b11
Cau_rec	385256646	T1b3
Cau_rec	385256632	T1b3
Cau_rec	385256534	T1b1
Cau_rec	385255876	T1a1
Cau_rec	385255862	T1a1
Cau_rec	385255848	T1a1
Cau_rec	385255736	T1a1
Cau_rec	385255554	J2b1
Cau_rec	385255540	J2b1
Cau_rec	385255428	J2b1d
Cau_rec	385254588	J1d3a1
Cau_rec	385254560	J1d3a1
Cau_rec	385254532	J1d6
Cau_rec	385254406	J1
Cau_rec	385253664	J1c3f
Cau_rec	385252894	J1b5a1
Cau_rec	373445970	I1
Cau_rec	373445746	W3a1
Cau_rec	373445732	W9
Cau_rec	373445718	W4d
Cau_rec	373445704	W3b
Cau_rec	373445690	N1b1a6
Cau_rec	373445676	W1c
Cau_rec	373445662	N1a1a2
Cau_rec	373445536	X2e2a
Cau_rec	373445522	I2
Cau_rec	373445438	X2f1
Cau_rec	373445424	I4a
Cau_rec	373445410	W6
Cau_rec	373445326	X2i
Cau_rec	373445284	N1b1a
Cau_rec	373445270	X2f
Cau_rec	373445242	I5
Cau_rec	373445228	W6
Cau_rec	356466878	M9a1b2
Cau_rec	356466864	M9a1a1a
Cau_rec	356466850	M10a2
Cau_rec	118122923	H13a1a1c
Cau_rec	118122909	H13a2c1
Cau_rec	118122881	H13b
Cau_rec	118122867	H13a1d
Cau_rec	118122853	H13a1a2
Cau_rec	118122836	H4b
Cau_rec	118122822	H4b
Cau_rec	118122794	H14b
Cau_rec	118122780	H2a4
Cau_rec	118122765	H2a3
Cau_rec	118122750	H2a4
Cau_rec	118122736	H21
Cau_rec	118122722	H6a1a1
CenA_rec	1049307339	G2a1d2
CenA_rec	1049307325	C4a1a3
CenA_rec	1049307311	D4g1b
CenA_rec	1049307241	D4j10
CenA_rec	1049307227	D2b1
CenA_rec	1049307213	C4a1a
CenA_rec	1049307171	G2a1
CenA_rec	1049307157	D4j3
CenA_rec	1049307143	D4j3
CenA_rec	1049307129	D4j
CenA_rec	1049307115	G2a1
CenA_rec	1049307101	G2a1
CenA_rec	332347786	F1a1
CenA_rec	154100934	T2b4h
CenA_rec	154100920	D4j8
CenA_rec	154100906	T2b16
CenA_rec	154100892	D5a2a1
CenA_rec	154100878	A
CenA_rec	154100864	D4i2
CenA_rec	78775947	G3a2a
CenA_rec	298367697	M9a1a
CenA_rec	292597178	N10a
CenA_rec	292596912	M7c1a
CenA_rec	292596842	M5a2a1a1
CenA_rec	281428376	N1a1a1a1a
CenA_rec	229503658	D1e
CenA_rec	13273228	B4c2a
CenA_rec	13272948	C4b1
CenA_rec	683416492	H1
CenA_rec	683416436	H1a5
CenA_rec	683416422	U4a2a
CenA_rec	683416408	H2b
CenA_rec	683416296	U4a2a
CenA_rec	683416282	H2a1a
CenA_rec	683416226	H11a2a2
CenA_rec	683416170	H15b
CenA_rec	683416128	H1ak
CenA_rec	683416114	U2e1
CenA_rec	683415764	HV12b1
CenA_rec	519125669	A1a
CenA_rec	519125193	B4b1a2e
CenA_rec	385253678	J1c3f
CenA_rec	356466948	M9a1b2
Chi_rec	211906294	R9c1a
Chi_rec	198386417	D4h3b
Chi_rec	335058246	D4e1a1
Chi_rec	335058218	N9a10a1
Chi_rec	161172493	M12a1a2
Chi_rec	90819911	R
Chi_rec	90819897	A5b1
Chi_rec	75905873	A2q
Chi_rec	75905871	D4b2b
Chi_rec	61743586	F3b
Chi_rec	326200789	B4d1
Chi_rec	325305858	M7c1
Chi_rec	325305844	D5b1a1
Chi_rec	325305830	D5a2a1
Chi_rec	325305816	D4h1b
Chi_rec	325305802	D4h1b
Chi_rec	325305788	D4h1b
Chi_rec	325305774	D4a3a1
Chi_rec	325070705	B4h1
Chi_rec	325070691	B4h
Chi_rec	325070635	B4a1c5
Chi_rec	322394301	C7a1c
Chi_rec	299834907	N9a1
Chi_rec	292597262	N8
Chi_rec	292597248	M7c1a2
Chi_rec	292597234	M61a
Chi_rec	292597220	M33c
Chi_rec	292597206	G2a1d2a
Chi_rec	292597192	M71a1
Chi_rec	292597164	M76a
Chi_rec	292597150	M75
Chi_rec	292597136	M74a
Chi_rec	292597080	M45a
Chi_rec	292597038	M7c3
Chi_rec	292597024	M7b1b
Chi_rec	292596968	M7b2
Chi_rec	292596940	M76
Chi_rec	292596926	M75
Chi_rec	292596898	R1a1b
Chi_rec	292596884	N10a
Chi_rec	292596870	M74b
Chi_rec	292596856	D4b1d
Chi_rec	292596828	M33c
Chi_rec	292596814	R2a
Chi_rec	292596800	M22b
Chi_rec	292596786	M7c1a3
Chi_rec	292596772	N11a1
Chi_rec	292596758	B4'5
Chi_rec	292596744	M71b
Chi_rec	292596730	M33b1
Chi_rec	292596716	M7c2a
Chi_rec	292596702	M76a
Chi_rec	292596688	M71b
Chi_rec	292596674	M7b2a
Chi_rec	292596660	M20
Chi_rec	292596646	M79
Chi_rec	292596632	M49c1
Chi_rec	292596618	M71a1a
Chi_rec	240251607	M71a
Chi_rec	238625896	B4c1b2a1
Chi_rec	13272696	F4a1b
Chi_rec	13272682	M9a1a1a
Chi_rec	1041579473	A
Chi_rec	998453340	N9a1'3
Chi_rec	998453242	N9a1
Chi_rec	984292195	M7c1
Chi_rec	430728436	M7b1a1e2
Chi_rec	937629959	A25
Chi_rec	937629945	Y2
Chi_rec	937629931	M7b1a1f
Chi_rec	704198226	D4g2a1
Chi_rec	704198153	Z4
Chi_rec	556713589	G3a1a
Chi_rec	556713575	M71a1
Chi_rec	556713561	B4a4
Chi_rec	556713533	B4a1
Chi_rec	556713519	A15c1
Chi_rec	556713505	C7b
Chi_rec	556713491	B4a1
Chi_rec	556713477	A11b
Chi_rec	556713463	A13
Chi_rec	556713449	D6c
Chi_rec	556713435	M7b1a1
Chi_rec	556713421	Z3
Chi_rec	556713407	M7c1a2a
Chi_rec	556713393	B5a
Chi_rec	556713379	N9a1
Chi_rec	556713365	F1a1'4
Chi_rec	556713351	F4a1a
Chi_rec	556713337	B4b1a2e
Chi_rec	556713323	M7c1a2a
Chi_rec	556713309	F1a1a
Chi_rec	556713267	C7a
Chi_rec	556713253	D4j1a1
Chi_rec	556713239	F1f
Chi_rec	556713225	D4j1a1
Chi_rec	556713211	F1a1a
Chi_rec	556713197	A13
Chi_rec	556713183	M13c
Chi_rec	556713169	M7b1a1b
Chi_rec	556713155	M7c1c2
Chi_rec	556713141	F1g
Chi_rec	556713127	C7a2
Chi_rec	556713113	F1a2
Chi_rec	556713099	C7a2
Chi_rec	556713085	R9b1a3
Chi_rec	556713071	C7a2
Chi_rec	556713057	D1h
Chi_rec	556713043	B4a1c4
Chi_rec	556712889	D4o1
Chi_rec	556712875	B4k
Chi_rec	556712861	M7b1a2a
Chi_rec	556712847	B5b2
Chi_rec	556712833	F1a1
Chi_rec	556712819	D4j15
Chi_rec	556712805	M7b1a1f
Chi_rec	556712791	C7a1c
Chi_rec	556712777	F2d
Chi_rec	556712763	M8a2b
Chi_rec	556711545	B4d1
Chi_rec	556711531	M7b1a1b
Chi_rec	556711517	A17
Chi_rec	556711503	B4k
Chi_rec	556711489	B5a1c1a1
Chi_rec	556711475	M7b1a1f
Chi_rec	556711461	D5a2a1
Chi_rec	556711447	D4i
Chi_rec	556711433	D4i
Chi_rec	556711419	A5b1b
Chi_rec	556711405	B5a1a
Chi_rec	556711391	B5a1
Chi_rec	556711377	F1b1c
Chi_rec	556711363	F3b
Chi_rec	556711349	A17
Chi_rec	556711335	F2a1
Chi_rec	556711321	F1c1a1a
Chi_rec	556711307	M11a2
Chi_rec	556711293	M11a2
Chi_rec	556711279	F1g1
Chi_rec	556710957	C4a1a
Chi_rec	556710943	M7b1a1f
Chi_rec	556710929	D4b2b2b
Chi_rec	556710915	B4a2b1
Chi_rec	556710901	R11a
Chi_rec	556710887	F1a1
Chi_rec	556710873	A2q
Chi_rec	556710859	B4h1
Chi_rec	556710845	A5b
Chi_rec	556710831	B4a
Chi_rec	556709893	Y1a
Chi_rec	556709879	M7b1a1a3
Chi_rec	556709851	C7a
Chi_rec	556709291	D5b4
Chi_rec	556709277	B5a1c1
Chi_rec	556709263	F1a3
Chi_rec	556709249	F1a1d
Chi_rec	556709235	M7c1c3
Chi_rec	556709221	B4k
Chi_rec	556709207	F2c1
Chi_rec	556707177	B5a1a
Chi_rec	556707163	B5a1a
Chi_rec	556707149	B4a1e
Chi_rec	556707135	M7b1a1f
Chi_rec	556707121	D4a1e
Chi_rec	556707107	B4a5
Chi_rec	556707093	B4b1c2
Chi_rec	556707079	D4
Chi_rec	556707065	R9c1b1
Chi_rec	556707051	F4a2
Chi_rec	556707037	D4a3b2
Chi_rec	556706701	R11a
Chi_rec	556706687	M7b1a1f
Chi_rec	556706673	A6a
Chi_rec	556706659	D5a2a1
Chi_rec	556706645	D4g2b1
Chi_rec	556706631	M7b1a1f
Chi_rec	556706617	M7b1a1b
Chi_rec	556706603	D4b2b
Chi_rec	556706589	A5b1b
Chi_rec	556706575	M7b1a1b
Chi_rec	556706561	M7b1a1c
Chi_rec	556706547	R9b1a3
Chi_rec	556706533	M7c1b
Chi_rec	678945993	M7c1b
Chi_rec	570437736	D5c1a
Chi_rec	570437722	B4b1c1
Chi_rec	570437708	A17
Chi_rec	570437694	Z4a
Chi_rec	570437680	R9b1
Chi_rec	570437666	F1b1c
Chi_rec	570437652	B5b4
Chi_rec	570437638	M9a1a1a
Chi_rec	570437624	G3b2
Chi_rec	570437610	M7c1a1a
Chi_rec	570437596	D5a2a1
Chi_rec	570437582	M8a3a1
Chi_rec	570437568	B4c1b2c2
Chi_rec	570437554	A22
Chi_rec	570437540	B4a4
Chi_rec	570437526	Z3
Chi_rec	570437512	B4a1c3b
Chi_rec	570437498	D4e1a3
Chi_rec	570437484	F2a
Chi_rec	570437470	B4c1c1
Chi_rec	570437456	F2e1
Chi_rec	570437442	F3a1
Chi_rec	570437428	D4g2a1c
Chi_rec	570437414	F1a1d
Chi_rec	570437400	B4h1
Chi_rec	570437386	M8a3a
Chi_rec	570437372	M7c1a4a
Chi_rec	570437358	M8a2c
Chi_rec	570437344	M7b1a1a3
Chi_rec	570437330	G3a3
Chi_rec	570437316	M7b1a1f
Chi_rec	570437302	G2b1a2
Chi_rec	570437288	D4b2b2
Chi_rec	570437274	U2e1h
Chi_rec	570437260	F1a1d
Chi_rec	570437246	F1e3
Chi_rec	570437232	C7
Chi_rec	570437218	G2c
Chi_rec	570437204	B5a1c2
Chi_rec	570437190	R11b
Chi_rec	570437176	B4a2b1
Chi_rec	570437162	A14
Chi_rec	570437148	B4a1e
Chi_rec	570437134	F1a1c3
Chi_rec	570437120	G2a1f1
Chi_rec	570437106	F1d1
Chi_rec	570437092	M10a1a1b
Chi_rec	570437078	M7b1a1f
Chi_rec	570437064	R9b1a2a
Chi_rec	570437050	C4a2c2
Chi_rec	570437036	A15a
Chi_rec	570437022	Z4a
Chi_rec	570437008	F1a1a
Chi_rec	570436994	F1b1f
Chi_rec	570436980	D5a2a1
Chi_rec	570436966	F1c1a1b
Chi_rec	570436952	G2a1d2
Chi_rec	570436938	F1a1a
Chi_rec	570436924	D4a6
Chi_rec	570436910	D5a2b
Chi_rec	570436896	M9b
Chi_rec	570436882	N9a10b
Chi_rec	570436868	D5a2a1
Chi_rec	570436854	D4g2
Chi_rec	570436840	B5a2a1a
Chi_rec	570436826	M7c1a3a
Chi_rec	570436812	G2b1a
Chi_rec	570436798	F1a2a
Chi_rec	570436784	M8a3a
Chi_rec	570436770	D4a3b
Chi_rec	570436756	D4j15
Chi_rec	570436742	D4a1e
Chi_rec	570436728	C4a1a2
Chi_rec	570436714	M8a2b
Chi_rec	570436700	B4k
Chi_rec	570436686	B4a
Chi_rec	570436672	F2c
Chi_rec	570436658	G2a1g
Chi_rec	570436644	F2i
Chi_rec	570436630	M7b1a2a
Chi_rec	570436616	D4
Chi_rec	570436602	M24b
Chi_rec	570436588	D5a2a1
Chi_rec	570436574	A17
Chi_rec	570436560	D5a2a1
Chi_rec	570436546	M8a3a1
Chi_rec	570436532	D5c1a
Chi_rec	570436518	D4j16
Chi_rec	570436504	F2g
Chi_rec	570436490	D4j15
Chi_rec	570436476	D4l2b
Chi_rec	570436462	B5a2a1b
Chi_rec	570436448	M9a1a1c1c
Chi_rec	570436434	F1a1a
Chi_rec	570436420	D4b2b
Chi_rec	570436406	D4j12
Chi_rec	576938023	M8a3
Chi_rec	443610324	D5b1c1
Chi_rec	443610310	D4a3b2
Chi_rec	443610296	M10a1b
Chi_rec	443610282	F3a1
Chi_rec	443610268	M7c1a
Chi_rec	443610254	G2a4
Chi_rec	443610240	D5a2a1
Chi_rec	443610226	F2c1
Chi_rec	443610212	A14
Chi_rec	443610198	F1e3
Chi_rec	443610184	C7a
Chi_rec	443610170	M7c1a3
Chi_rec	443610156	M7c1c2
Chi_rec	443610142	D4a1
Chi_rec	443610128	F1a1a
Chi_rec	443610114	M7c1a4b
Chi_rec	443610100	M7b1a1f
Chi_rec	443610086	D4b1b
Chi_rec	443610072	M8a2d
Chi_rec	443610058	C7a2a
Chi_rec	549512755	D4h1c
Chi_rec	490346329	B4i1
Chi_rec	490346315	B4i1
Chi_rec	490346301	B4i1
Chi_rec	490346287	Z4
Chi_rec	490346273	Z4
Chi_rec	490346259	Z4
Chi_rec	490346245	D4b1b
Chi_rec	490346231	D4b1b
Chi_rec	490346217	D4b1b
Chi_rec	490346203	F2a
Chi_rec	490346189	F2a
Chi_rec	490346175	F2a
Chi_rec	490346161	D4h1c
Chi_rec	490346133	D4h1c
Chi_rec	490346119	F1b1f
Chi_rec	490346105	F1b1f
Chi_rec	490346091	F1b1f
Chi_rec	490346077	M71a1a
Chi_rec	490346063	M71a1a
Chi_rec	490346049	M71a1a
Chi_rec	490346035	B4e
Chi_rec	490346021	B4e
Chi_rec	490346007	B4e
Chi_rec	490345993	F1a4b
Chi_rec	490345979	F1a4b
Chi_rec	490345965	F1a4b
Chi_rec	490345951	M91a
Chi_rec	490345937	M91a
Chi_rec	490345923	M91a
Chi_rec	443610723	B4'5
Chi_rec	410935868	G2a2a
Chi_rec	298367361	D4g2a1b
Chi_rec	298367347	M7b1a1e1
Chi_rec	298367333	F1a1c
Chi_rec	298367319	M7b1a1a3
Chi_rec	298367305	M74a
Chi_rec	298367291	F1a1a
Chi_rec	298367277	M7b1a1c1
Chi_rec	298367263	M7b1a1a3
Chi_rec	298367249	F1c1a1
Chi_rec	298367235	D4e1a3
Chi_rec	48526883	B6a
Chi_rec	48131404	M10a1a1a
Chi_rec	32891746	F2b
Chi_rec	32891732	B5b2a1
Chi_rec	32891704	F1c1a1
Chi_rec	32891676	F1a1a
Chi_rec	32891662	C4a1a2a
Chi_rec	32891648	M7b1a1a1
Chi_rec	32891634	M12a1b
Chi_rec	32891620	M7b1a1f
Chi_rec	32891606	B4b1a2a
Chi_rec	32891592	D5b1c
Chi_rec	32891579	F2a1
Chi_rec	32891565	F3a
Chi_rec	32891551	A6a
Chi_rec	32891537	D4b1b2
Chi_rec	32891523	F1a2a
Chi_rec	32891509	R11b1b
Chi_rec	32891495	D5a2a1b
Chi_rec	32891481	M8a2d
Chi_rec	32891467	D4a3b2
Chi_rec	32891453	M7b1a1b
Chi_rec	32891425	G2a1
Chi_rec	32891411	M11b1a1
Chi_rec	32891397	Z4a1
Chi_rec	32891383	M10a1b
Chi_rec	32891369	M9a1a1c1a
Chi_rec	32891355	R9b1a2a
Chi_rec	32891341	D6c
Chi_rec	32891327	M8a2a1
Chi_rec	32891299	M11a2
Chi_rec	32891257	B5a1b
Chi_rec	32891243	A2f2
Chi_rec	32891215	M11a
Chi_rec	32891201	N9a1a
Chi_rec	32891187	B4d2
Chi_rec	32891159	Y1b1
Chi_rec	32891145	G1c1
Chi_rec	32891089	B4g1a
Com_rec	186695186	D2a1a
Com_rec	186695172	D2a1a
Com_rec	186695158	D2a1a
Com_rec	186695144	D2a1a
Com_rec	186695130	D2a1a
Com_rec	186695116	D2a1a
Com_rec	186695102	D2a1a
Com_rec	186695088	D2a1a
Com_rec	186695074	D2a1a
Com_rec	186695060	D2a1a
Com_rec	186695046	D2a1a
Com_rec	186695032	D2a1a
Com_rec	186695018	D2a1a
Com_rec	186695004	D2a1a
Com_rec	186694990	D2a1a
Com_rec	186694976	D2a1a
Com_rec	186694864	D2a
Com_rec	186694850	D2a
Com_rec	186694836	D2a
Com_rec	186694822	D2a1a
Com_rec	186694808	D2a1a
Com_rec	186694794	D2a1a
Com_rec	186694780	D2a1a
Com_rec	186694766	D2a1a
Com_rec	186694752	D2a1a
Com_rec	186694738	D2a1a
Com_rec	186694724	D2a1a
Com_rec	186694710	D2a1a
Com_rec	186694696	D2a1a
Com_rec	186694668	D2a
CrS_rec	1022946438	U8a1a1a
CrS_rec	1022946424	U4b1a1a1
CrS_rec	1022946410	U1a1c
CrS_rec	1022946396	K1b1c
CrS_rec	1022946382	U5a2b1
CrS_rec	1022946368	K1b1c
CrS_rec	1022946354	U3a1
CrS_rec	1022946340	K1a4
CrS_rec	1022946326	U5b1a
CrS_rec	1022946312	U4c1
CrS_rec	1022946298	U5a1a1
CrS_rec	1022946284	U5a2b
CrS_rec	1022946270	U7b
CrS_rec	1022946256	U2e1b1
CrS_rec	1022946242	U5b1a
CrS_rec	1022946228	U3a3
CrS_rec	1022946214	U1a1c
CrS_rec	1022946200	K1a30
CrS_rec	1022946186	U4b1a1a
CrS_rec	1022946172	K1a2
CrS_rec	1022946158	U4b1a1a1
CrS_rec	1022946144	U4c1
CrS_rec	1022946130	U5a1a2a
CrS_rec	1022946116	U4d2
CrS_rec	1022946102	K1a4a1
CrS_rec	1022946088	U4c1
CrS_rec	1022946074	U2e2a1d
CrS_rec	1022946060	K1a13a
CrS_rec	1022946046	K1b2a2
CrS_rec	1022946032	U5a2b1
CrS_rec	1022946018	U5b3
CrS_rec	1022946004	U4b
CrS_rec	1022945990	K1a4d
CrS_rec	1022945976	U5b1h
CrS_rec	1022945962	K1b1c
CrS_rec	1022945948	K1a4
CrS_rec	381277437	K1a13a
CrS_rec	339516399	K1a13a
CrS_rec	237652545	U5b3
CrS_rec	940816596	H1b2
CrS_rec	827529385	H4
CrS_rec	690196635	U4a2c
CrS_rec	690196620	H5e1
CrS_rec	690196605	U4a2a
CrS_rec	690196590	H5a1
CrS_rec	690196575	HV2a2
CrS_rec	690196560	H5a1
CrS_rec	690196545	HV10
CrS_rec	690196530	U4a2a1
CrS_rec	690196515	U4a2g
CrS_rec	690196489	HV16
CrS_rec	690196474	D4j8
CrS_rec	690196455	H6a2
CrS_rec	690196440	H5
CrS_rec	690196425	HV16
CrS_rec	690196410	HV16
CrS_rec	690196392	H6a1a
[truncated: 10,262 more rows]

## Sheet: S3b pop.list
S3b Table: Summary of the modern (top) and ancient (below) population database with abbreviations used in this study. In case of low sample size related neighboring populations were merged whose list is provided next to their group name.
modern populations (from S3a)	short	sample no.
Adygei	Adg	24
Altai region (Teleut, Shor, Kizhi, Tubular)	Alt	83
Arab (Saudi Arabia)	Arb	98
Armenian	Arm	422
Azeri	Aze	65
Baltic states (Lithuanian, Latvian, Estonian)	Balt	25
Belarus	Bel	57
Belgian+Dutch	BeN	65
Basque	Bsq	453
Bulgarian	Bul	48
Buryat	Bur	133
Caucasus region (Chechen, Kurdish, Karachay, Georgian, Ossetian, Kabardinian, Cherkess, Darginian, Dstan, Kalmyk, Avar)	Cau	106
Central Asia (Uzbek, Kyrgyz, Kazakh, Turkmen)	CenA	43
Chinese	Chi	382
Commander Islands	Com	30
Croatian, Serbian	CrS	122
Chukchi	Cuk	49
Czech	Czh	72
Danish	Dan	2834
Druze	Drz	44
Egyptian	Egy	56
English	Eng	153
Eskimo ( Naukan, Aleut, Inuit, Tlingit)	Esk	51
Even	Eve	130
Evenki	Evk	162
Finnish	Fin	651
French	Fre	141
German	Ger	105
Gilyak	Gil	38
Greek	Gre	53
Hungarian	Hun	289
Spanish, Portugese	Ibe	434
Iranian	Ira	394
Ireland	Ire	92
Italian	Ita	645
Japanese, Korean	Jap	1181
Khamnigan	Kham	31
Koryak	Kry	32
Ladakh	Lad	50
Mongols (Mongolia, Inner Mongolia, Manchuria)	Mon	168
Near East (Iraqi, Lebanese, Jordan, Palestin)	NE	113
Nganasan	Nga	12
Norwegian	Nor	35
Pakistan, Afganistan	PAf	168
Polish	Pol	257
Romanian	Rom	31
Russian	Rus	248
Saami	Sam	21
Sadinian	Sar	140
Scottish	Sco	60
Slovakian	Slo	55
Swedish	Swe	107
Volga Tatar	Tat	84
Tibetan	Tib	402
Turkish	Trk	65
Tuvan	Tuv	26
Udegei	Ude	32
Ukraine	Ukr	42
Ulchi	Ulc	15
Yakut	Yak	210
Yugra (Mansi, Khanty)	Yug	24
Yukaghir	Yuk	66
	Sum:	12224
ancient populations (from S3c)	Short	sample no.	Mitogenomes available
Afanasievo	Afa	5	5
Altai Iron Age	AltIA	7	7
Anatolia-Middle-East Neolithic	AnN	58	58
Armenia-Iran Chalcolithic--Bronze Age	ArmBA	55	55
Armenian Iron Age-Medieval Age	ArmIA	13	13
Baltic Late Bronze Age	BalBA	18	0
Bell Baker Late Neolith	BelB	19	19
Britain Middle Age	BrMA	14	14
Comb Ceramic Culture	Comb	11	7
Northern Corded Ware	CWC	12	9
Europe Early Neolithic	EUEN	40	40
Europe Late Neolithic-Early Bronze Age	EULNBA	41	41
Hungarian Bronze Age	HuBA	12	12
Iberian Chalcolithic	IbCh	21	21
Iberia Neolithic	IbN	10	10
Karasuk	Kar	7	7
Narva Culture Baltic ceramist hunter-gatherers	Nar	16	15
Northern Europe Neolith-Bronze Age	NNBA	19	14
Mesolithic	MesA	37	37
Paleolithic	PalA	39	39
Poltavka-Potapovka Bronze Age	PoBA	8	8
European Scythians, Iron Age	Scy	20	20
Sintashta-Andronovo Bronze Age	Sint	9	9
Srubnaya	Sru	14	14
Yamnaya	Yam	15	15
Other ancient samples without population (from S3d)		44
	Sum:	564	489

## Sheet: S3c ancient pop database
S3c Table: Ancient mtDNA genome database. Pink background highligts samples, for which sequence was not available, so these were only included in SHD analysis. Yellow background highlights haplogroups, which were classified differently by Haplofind than published originally (Haplofind/original). Supplementary references are provided below the table.
Short	Analysis Label	Culture or age	Date	Location	Country	GeneBank ID	Other ID	mtDNA haplogroup	Reference
Afa	Afanasievo	Afanasievo	2909-2679 calBCE (OxA-31568)	Bateni	Russia	RISE511		J2a2a	Allentoft et al., 2015
Afa	Afanasievo	Afanasievo	3322-2923 calBCE (OxA-31219)	River Kuyum	Russia	RISE507		U5a1a1	Allentoft et al., 2015
Afa	Afanasievo	Afanasievo	2887-2677 calBCE (OxA-31221)	Bateni	Russia	RISE509		T2c1a2	Haak et al., 2015; I. P. Lazaridis et al., 2016
Afa	Afanasievo	Afanasievo	3331-2935 calBCE (OxA-31220)	River Kuyum	Russia	RISE508		U5a1a1	Haak et al., 2015; I. P. Lazaridis et al., 2016
Afa	Afanasievo	Afanasievo	2851-2468 calBCE (OxA-31222)	Bateni	Russia	RISE510		J2a2a	Mathieson et al., 2015
AltIA	Altai IA	Iron Age	no data	Sary-Bel	Russia	RISE602		C4	Allentoft et al., 2015
AltIA	Altai IA	Iron Age	721-889 AD	Kytmanovo	Russia	RISE504		M1/C4a1d	Allentoft et al., 2015
AltIA	Altai IA	Iron Age	396-209 calBC	Sabinka 2	Russia	RISE492		D4b1a2a2	Allentoft et al., 2015
AltIA	Altai IA	Late Bronze Age	926-815 calBC	Afontova Gora	Russia	RISE553		F1b1b	Allentoft et al., 2015
AltIA	Altai IA	Late Bronze Age	1005-844 calBC	Afontova Gora	Russia	RISE554		F1b1b	Allentoft et al., 2015
AltIA	Altai IA	Iron Age	no data	Verh-Uimon	Russia	RISE600		K2a5b	Allentoft et al., 2015
AltIA	Altai IA	Iron Age	no data	Verh-Uimon	Russia	RISE601		M8a1	Allentoft et al., 2015
AnN	Neolithic Anatolia-ME	Anatolia_Neolithic	6500-6200 BCE	Barcın	Turkey	I1099		T2b	Allentoft et al., 2015
AnN	Neolithic Anatolia-ME	Anatolia_Neolithic	6500-6200 BCE	Barcın	Turkey	I1101		T2b	Allentoft et al., 2015
AnN	Neolithic Anatolia-ME	Anatolia_Neolithic_1d_rel_I0736	6500-6200 BCE	Barcın	Turkey	I0854		N1a1a1a	Gamba et al., 2014
AnN	Neolithic Anatolia-ME	Anatolia_Neolithic_outlier	6400-5600 BCE	Menteşe	Turkey	I0725		N1a1a1	Haak et al., 2015; I. P. Lazaridis et al., 2016
AnN	Neolithic Anatolia-ME	Anatolia_Neolithic	6500-6200 BCE	Barcın	Turkey	I1096		N1a1a1	Haak et al., 2015; I. P. Lazaridis et al., 2016
AnN	Neolithic Anatolia-ME	Anatolia_Neolithic	6500-6200 BCE	Barcın	Turkey	I0736		N1a1a1a	Haak et al., 2015; I. P. Lazaridis et al., 2016
AnN	Neolithic Anatolia-ME	Early Neolithic	6,212–6,030	Barcın	Turkey	KU171098.1		K1a2	Hofmanova, Kreutzer, Hallenthal, Sell, & Diekmann, 2016
AnN	Neolithic Anatolia-ME	Early Neolithic	6,438–6,264	Revenia	Greece	KU171096.1		X2b	Hofmanova, Kreutzer, Hallenthal, Sell, & Diekmann, 2016
AnN	Neolithic Anatolia-ME	Early Neolithic	6,419–6,238	Barcın	Turkey	KU171097.1		X2m	Hofmanova, Kreutzer, Hallenthal, Sell, & Diekmann, 2016
AnN	Neolithic Anatolia-ME	Final Neolithic	4,230–3,995	Kleitos	Greece	KU171100.1		K1a2	Hofmanova, Kreutzer, Hallenthal, Sell, & Diekmann, 2016
AnN	Neolithic Anatolia-ME	Late Neolithic	4,452–4,350	Paliambela	Greece	KU171099.1		J1c1	Hofmanova, Kreutzer, Hallenthal, Sell, & Diekmann, 2016
AnN	Neolithic Anatolia-ME	Early_Neolithic	8300-7500 calBC	Bumcuklu	Tukrey	Kilinc_2016_Bon002:ALL		K1a	Kılınç et al., 2016
AnN	Neolithic Anatolia-ME	Early_Neolithic	7500-5800 calBC	Tepecik-C¸iftlik	Tukrey	Kilinc_2016_Tep001:ALL		K1a	Kılınç et al., 2016
AnN	Neolithic Anatolia-ME	Early_Neolithic	7500-5800 calBC	Tepecik-C¸iftlik	Tukrey	Kilinc_2016_Tep002:ALL		K1a12a	Kılınç et al., 2016
AnN	Neolithic Anatolia-ME	Early_Neolithic	8300-7500 calBC	Bumcuklu	Tukrey	Kilinc_2016_Bon004:ALL		N1a1a1	Kılınç et al., 2016
AnN	Neolithic Anatolia-ME	Early_Neolithic	8300-7500 calBC	Bumcuklu	Tukrey	Kilinc_2016_Bon005:ALL		N1a1a1	Kılınç et al., 2016
AnN	Neolithic Anatolia-ME	Early_Neolithic	7500-5800 calBC	Tepecik-C¸iftlik	Tukrey	Kilinc_2016_Tep004:ALL		N1a1a1	Kılınç et al., 2016
AnN	Neolithic Anatolia-ME	Early_Neolithic	7500-5800 calBC	Tepecik-C¸iftlik	Tukrey	Kilinc_2016_Tep006:ALL		N1a1a1	Kılınç et al., 2016
AnN	Neolithic Anatolia-ME	Early_Neolithic	7500-5800 calBC	Tepecik-C¸iftlik	Tukrey	Kilinc_2016_Tep003:ALL		N1b1a	Kılınç et al., 2016
AnN	Neolithic Anatolia-ME	Early_Neolithic	8300-7500 calBC	Bumcuklu	Tukrey	Kilinc_2016_Bon001:ALL		U3	Kılınç et al., 2016
AnN	Neolithic Anatolia-ME	Ganj_Dareh_Iran_Neolithic	8000-7700 BCE	Ganj Dareh	Iran	S1944		H2a2b5/R2	I. P. Lazaridis et al., 2016
AnN	Neolithic Anatolia-ME	Ganj_Dareh_Iran_Neolithic	8202-7681 calBCE (8800±50 BP, Poz-81109)	Ganj Dareh	Iran	S1951		HV9c/HV0f	I. P. Lazaridis et al., 2016
AnN	Neolithic Anatolia-ME	Ganj_Dareh_Iran_Neolithic	8000-7700 BCE	Ganj Dareh	Iran	S1945		J1c	I. P. Lazaridis et al., 2016
AnN	Neolithic Anatolia-ME	Ganj_Dareh_Iran_Neolithic	8179-7613 calBCE (8780±50 BP, Poz-81100)	Ganj Dareh	Iran	S1290 and S1628		X2	I. P. Lazaridis et al., 2016
AnN	Neolithic Anatolia-ME	Ganj_Dareh_Iran_recent	1430-1485 calCE (430±30 BP, Beta-432801)	Ganj Dareh	Iran	S1955		U1a1a3	I. P. Lazaridis et al., 2016
AnN	Neolithic Anatolia-ME	Iran_Late_Neolithic	5837-5659 calBCE (6850±50 BP, OxA-33168)	Seh Gabi	Iran	S1671		K1a12a	I. P. Lazaridis et al., 2016
AnN	Neolithic Anatolia-ME	PPNB (Levant_N)	8300-7900 BCE	'Ain Ghazal	Jordan	S1414		K1a18	I. P. Lazaridis et al., 2016
AnN	Neolithic Anatolia-ME	PPNB (Levant_N)	7300-6750 BCE	Motza	Israel	S0867 and S1629		K1a4b	I. P. Lazaridis et al., 2016
AnN	Neolithic Anatolia-ME	PPNB (Levant_N)	7722-7541 calBCE (8590±50 BP, Poz-81097)	'Ain Ghazal	Jordan	S1707		R0a	I. P. Lazaridis et al., 2016
AnN	Neolithic Anatolia-ME	PPNB (Levant_N)	7446-7058 calBCE (8190±60 BP, Poz-81095)	'Ain Ghazal	Jordan	S1704		T1	I. P. Lazaridis et al., 2016
AnN	Neolithic Anatolia-ME	PPNB (Levant_N)	8300-7900 BCE	'Ain Ghazal	Jordan	S1700		T1a2	I. P. Lazaridis et al., 2016
AnN	Neolithic Anatolia-ME	PPNB (Levant_N)	7733-7526 calBCE (8580±60 BP, Poz-81098)	'Ain Ghazal	Jordan	S1710		T1a2	I. P. Lazaridis et al., 2016
AnN	Neolithic Anatolia-ME	PPNB (Levant_N)	8300-7900 BCE	'Ain Ghazal	Jordan	S1727		T1a2	I. P. Lazaridis et al., 2016
AnN	Neolithic Anatolia-ME	PPNC (Levant_N)	6900-6800 BCE	'Ain Ghazal	Jordan	S1679		P4/I	I. P. Lazaridis et al., 2016
AnN	Neolithic Anatolia-ME	PPNC (Levant_N)	6800-6700 BCE	'Ain Ghazal	Jordan	S1699		R0a2	I. P. Lazaridis et al., 2016
AnN	Neolithic Anatolia-ME	NEO/Neolithic	5925-5717 BC	Aknashen	Armenia	MF362720.1	arm39_mt	I1	Margaryan et al., 2017
AnN	Neolithic Anatolia-ME	NEO/Neolithic	5900-5600 BC	Aknashen	Armenia	MF362734.1	arm7_mt	H/H2+152 (H)	Margaryan et al., 2017
AnN	Neolithic Anatolia-ME	NEO/Neolithic	5900-5600 BC	Aknashen	Armenia	MF362735.1	arm9_mt	H15a1	Margaryan et al., 2017
AnN	Neolithic Anatolia-ME	Anatolia_Neolithic	6500-6200 BCE	Barcın	Turkey	I1580		H5	Mathieson et al., 2015
AnN	Neolithic Anatolia-ME	Anatolia_Neolithic	6400-5600 BCE	Menteşe	Turkey	I0726		H61a	Mathieson et al., 2015
AnN	Neolithic Anatolia-ME	Anatolia_Neolithic	6500-6200 BCE	Barcın	Turkey	I1585		J1c	Mathieson et al., 2015
AnN	Neolithic Anatolia-ME	Anatolia_Neolithic	6500-6200 BCE	Barcın	Turkey	I0744		J1c11	Mathieson et al., 2015
AnN	Neolithic Anatolia-ME	Anatolia_Neolithic	6500-6200 BCE	Barcın	Turkey	I1100		K1a	Mathieson et al., 2015
AnN	Neolithic Anatolia-ME	Anatolia_Neolithic	6500-6200 BCE	Barcın	Turkey	I1579		K1a	Mathieson et al., 2015
AnN	Neolithic Anatolia-ME	Anatolia_Neolithic	6500-6200 BCE	Barcın	Turkey	I0746		K1a1	Mathieson et al., 2015
AnN	Neolithic Anatolia-ME	Anatolia_Neolithic	6400-5600 BCE	Menteşe	Turkey	I0727		K1a2	Mathieson et al., 2015
AnN	Neolithic Anatolia-ME	Anatolia_Neolithic	6500-6200 BCE	Barcın	Turkey	I1583		K1a2	Mathieson et al., 2015
AnN	Neolithic Anatolia-ME	Anatolia_Neolithic	6500-6200 BCE	Barcın	Turkey	I1102		K1a3a	Mathieson et al., 2015
AnN	Neolithic Anatolia-ME	Anatolia_Neolithic	6500-6200 BCE	Barcın	Turkey	I0707		K1a4	Mathieson et al., 2015
AnN	Neolithic Anatolia-ME	Anatolia_Neolithic	6400-5600 BCE	Menteşe	Turkey	I0724		K1a4	Mathieson et al., 2015
AnN	Neolithic Anatolia-ME	Anatolia_Neolithic	6500-6200 BCE	Barcın	Turkey	I1103		K1b1b1	Mathieson et al., 2015
AnN	Neolithic Anatolia-ME	Anatolia_Neolithic	6500-6200 BCE	Barcın	Turkey	I0708		N1b1a	Mathieson et al., 2015
AnN	Neolithic Anatolia-ME	Anatolia_Neolithic	6500-6200 BCE	Barcın	Turkey	I0709		U3	Mathieson et al., 2015
AnN	Neolithic Anatolia-ME	Anatolia_Neolithic	6500-6200 BCE	Barcın	Turkey	I1581		U3	Mathieson et al., 2015
AnN	Neolithic Anatolia-ME	Anatolia_Neolithic	6500-6200 BCE	Barcın	Turkey	I0745		U8b1b1	Mathieson et al., 2015
AnN	Neolithic Anatolia-ME	Anatolia_Neolithic	6500-6200 BCE	Barcın	Turkey	I1097		W1	Mathieson et al., 2015
AnN	Neolithic Anatolia-ME	Anatolia_Neolithic	6500-6200 BCE	Barcın	Turkey	I1098		X2d	Mathieson et al., 2015
AnN	Neolithic Anatolia-ME	Anatolia_Neolithic	6400-5600 BCE	Menteşe	Turkey	I0723		X2m2	Mathieson et al., 2015
ArBA	Arm-Iran Chal-BA	Late Bronze Age	1048-855 calBC	Kapan	Armenia	RISE396		H6b1	Allentoft et al., 2015
ArBA	Arm-Iran Chal-BA	Late Bronze Age	1115-895 calBC	Norabak	Armenia	RISE407		H8a1	Allentoft et al., 2015
ArBA	Arm-Iran Chal-BA	Late Bronze Age	1209-1009 calBC	Norabak	Armenia	RISE408		I5c	Allentoft et al., 2015
ArBA	Arm-Iran Chal-BA	Middle Bronze Age	1643-1445 calBC	Nerquin Getashen	Armenia	RISE416		K1a17a	Allentoft et al., 2015
ArBA	Arm-Iran Chal-BA	Late Bronze Age	1048-855 calBC	Kapan	Armenia	RISE397		T1a2	Allentoft et al., 2015
ArBA	Arm-Iran Chal-BA	Middle Bronze Age	1402-1211 calBC	Nerquin Getashen	Armenia	RISE423		T2a3	Allentoft et al., 2015
ArBA	Arm-Iran Chal-BA	Middle Bronze Age	1906-1698 calBC	Nerquin Getashen	Armenia	RISE413		T2c1f	Allentoft et al., 2015
ArBA	Arm-Iran Chal-BA	Late Bronze Age	1193-945 calBC	Noratus	Armenia	RISE412		U4c1	Allentoft et al., 2015
ArBA	Arm-Iran Chal-BA	Anatolia_Chalcolithic	3943-3708 calBCE (5016±31 BP, OxA-32776)	Barcın	Turkey	S1584		K1a17/K1a12a	I. P. Lazaridis et al., 2016
ArBA	Arm-Iran Chal-BA	Armenia_Chalcolithic	4350-3700 BCE	Areni1	Armenia	S1407		H	I. P. Lazaridis et al., 2016
ArBA	Arm-Iran Chal-BA	Armenia_Chalcolithic	4330-4060 calBCE (5366±31 BP, OxA-19331)	Areni1	Armenia	S1634		H2a1i	I. P. Lazaridis et al., 2016
ArBA	Arm-Iran Chal-BA	Armenia_Chalcolithic	4250-4050 calBCE (5323±30 BP, OxA-19332)	Areni1	Armenia	S1631		K1a	I. P. Lazaridis et al., 2016
ArBA	Arm-Iran Chal-BA	Armenia_Chalcolithic	4230-4000 calBCE (5285±29 BP, OxA-18599)	Areni1	Armenia	S1632		K1a	I. P. Lazaridis et al., 2016
ArBA	Arm-Iran Chal-BA	Armenia_Chalcolithic	4229-3985 calBCE (5260±30 BP, Poz-81110)	Areni1	Armenia	S1409		U4a2	I. P. Lazaridis et al., 2016
ArBA	Arm-Iran Chal-BA	Armenia_EBA	2619-2410 calBCE (3990±35 BP, Poz-22234)	Kalavan	Armenia	S1633		H1u	I. P. Lazaridis et al., 2016
ArBA	Arm-Iran Chal-BA	Armenia_EBA	3347-3092 calBCE (4492±29 BP, OxA-31874)	Talin	Armenia	S1658		U3a2a	I. P. Lazaridis et al., 2016
ArBA	Arm-Iran Chal-BA	Armenia_EBA	2619-2465 calBCE (4005±35 BP, Poz-81102)	Kalavan	Armenia	S1635		X2f	I. P. Lazaridis et al., 2016
ArBA	Arm-Iran Chal-BA	Armenia_MBA	1501-1402 calBCE (3168±27 BP, OxA-31674)	Katnaghbiur Kurgan 1	Armenia	S1656		T1a2/T1a1'3	I. P. Lazaridis et al., 2016
ArBA	Arm-Iran Chal-BA	Iran_Chalcolithic	4696-4491 calBCE (5740±40 BP, Poz-81104)	Seh Gabi	Iran	S1661		H29	I. P. Lazaridis et al., 2016
ArBA	Arm-Iran Chal-BA	Iran_Chalcolithic	3972-3800 calBCE (5105±35 BP, Poz-81108)	Seh Gabi	Iran	S1674		I1c1	I. P. Lazaridis et al., 2016
ArBA	Arm-Iran Chal-BA	Iran_Chalcolithic	4831-4612 calBCE (5860±40 BP, Poz-81105)	Seh Gabi	Iran	S1662		K1a12a	I. P. Lazaridis et al., 2016
ArBA	Arm-Iran Chal-BA	Iran_Chalcolithic	4839-4617 calBCE (5870±40 BP, Poz-81107)	Seh Gabi	Iran	S1670		U3a'c	I. P. Lazaridis et al., 2016
ArBA	Arm-Iran Chal-BA	Iran_Chalcolithic	3956-3796 calBCE (5070±30 BP, Poz-81106)	Seh Gabi	Iran	S1665		U7	I. P. Lazaridis et al., 2016
ArBA	Arm-Iran Chal-BA	Iran_HotuIIIb	9100-8600 BCE (questionable direct date of 7250 ± 40 bp (6218-6034 calBCE))	Hotu Cave	Iran	S1293		HV2a	I. P. Lazaridis et al., 2016
ArBA	Arm-Iran Chal-BA	Jordan_EBA	2198-1966 calBCE (3690±35 BP, Poz-81096)	'Ain Ghazal	Jordan	S1705		H14a	I. P. Lazaridis et al., 2016
ArBA	Arm-Iran Chal-BA	Jordan_EBA	2489-2299 calBCE (3925±31 BP, OxA-32775)	'Ain Ghazal	Jordan	S1730		R0a1a	I. P. Lazaridis et al., 2016
ArBA	Arm-Iran Chal-BA	Jordan_EBA	2490-2300 BCE	'Ain Ghazal	Jordan	S1706		X2n	I. P. Lazaridis et al., 2016
ArBA	Arm-Iran Chal-BA	EBA/Kura-Araxes	3000-2800 BC	Kaps	Armenia	MF362701.1	arm1_mt	K3	Margaryan et al., 2017
ArBA	Arm-Iran Chal-BA	LBA/Lchashen-Metsamor	1300-1100 BC	Sotk 1	Armenia	MF362693.1	arm11_mt	U3b2c/U3b	Margaryan et al., 2017
ArBA	Arm-Iran Chal-BA	LBA/Lchashen-Metsamor	1400-1200 BC	Nerqin Getashen	Armenia	MF362697.1	arm15_mt	H15a1a1	Margaryan et al., 2017
ArBA	Arm-Iran Chal-BA	LBA/Lchashen-Metsamor	1400-1200 BC	Nerqin Getashen	Armenia	MF362698.1	arm16_mt	K1a12a	Margaryan et al., 2017
ArBA	Arm-Iran Chal-BA	LBA/Lchashen-Metsamor	1400-1200 BC	Nerqin Getashen	Armenia	MF362699.1	arm18_mt	H15a1a1	Margaryan et al., 2017
ArBA	Arm-Iran Chal-BA	LBA/Lchashen-Metsamor	1400-1200 BC	Nerqin Getashen	Armenia	MF362700.1	arm19_mt	K1a1b1e	Margaryan et al., 2017
ArBA	Arm-Iran Chal-BA	EBA/Kura-Araxes	3000-2800 BC	Kaps	Armenia	MF362711.1	arm2_mt	R1a1	Margaryan et al., 2017
ArBA	Arm-Iran Chal-BA	LBA/Lchashen-Metsamor	1383-1241 BC	Nerqin Getashen	Armenia	MF362702.1	arm20_mt	H8a1	Margaryan et al., 2017
ArBA	Arm-Iran Chal-BA	EIA/Lchashen-Metsamor	1300-1100 BC	Kanagegh	Armenia	MF362703.1	arm21_mt	HV12b1	Margaryan et al., 2017
ArBA	Arm-Iran Chal-BA	EIA/Lchashen-Metsamor	1300-1100 BC	Akunk	Armenia	MF362704.1	arm22_mt	H2a2b	Margaryan et al., 2017
ArBA	Arm-Iran Chal-BA	LBA/Lchashen-Metsamor	1500-1300 BC	Kanagegh	Armenia	MF362705.1	arm23_mt	R1a1a	Margaryan et al., 2017
ArBA	Arm-Iran Chal-BA	LBA/Lchashen-Metsamor	1400-1200 BC	Kanagegh	Armenia	MF362709.1	arm28_mt	K1a4c1	Margaryan et al., 2017
ArBA	Arm-Iran Chal-BA	LBA/Lchashen-Metsamor	1400-1200 BC	Nerqin Getashen	Armenia	MF362710.1	arm29_mt	R1b1	Margaryan et al., 2017
ArBA	Arm-Iran Chal-BA	EBA/Kura-Araxes	3039-2864 BC	Kaps	Armenia	MF362721.1	arm3_mt	K3	Margaryan et al., 2017
ArBA	Arm-Iran Chal-BA	LBA/Lchashen-Metsamor	1500-1300 BC	Nerqin Getashen	Armenia	MF362712.1	arm30_mt	U8b1a2b	Margaryan et al., 2017
ArBA	Arm-Iran Chal-BA	LBA/Lchashen-Metsamor	1400-1200 BC	Nerqin Getashen	Armenia	MF362713.1	arm31_mt	T1a9	Margaryan et al., 2017
ArBA	Arm-Iran Chal-BA	LBA/Lchashen-Metsamor	1400-1200 BC	Nerqin Getashen	Armenia	MF362714.1	arm32_mt	HV1a2	Margaryan et al., 2017
ArBA	Arm-Iran Chal-BA	LBA/Lchashen-Metsamor	1400-1200 BC	Nerqin Getashen	Armenia	MF362715.1	arm33_mt	W3b	Margaryan et al., 2017
ArBA	Arm-Iran Chal-BA	LBA/Lchashen-Metsamor	1348-1175 BC	Nerqin Getashen	Armenia	MF362716.1	arm34_mt	U3b	Margaryan et al., 2017
ArBA	Arm-Iran Chal-BA	MBA/Trialeti-Vanadzor 2	2000-1800 BC	Nerqin Getashen	Armenia	MF362717.1	arm35_mt	U3b2/U3b	Margaryan et al., 2017
ArBA	Arm-Iran Chal-BA	LBA/Lchashen-Metsamor	1500-1300 BC	Sevan	Armenia	MF362718.1	arm36_mt	U2e1e	Margaryan et al., 2017
ArBA	Arm-Iran Chal-BA	EBA/Kura-Araxes	3449-3091 BC	Godedzor	Armenia	MF362722.1	arm40_mt	H14b2	Margaryan et al., 2017
ArBA	Arm-Iran Chal-BA	EBA/Kura-Araxes	3500-3200 BC	Godedzor	Armenia	MF362723.1	arm42_mt	T1a2/T1	Margaryan et al., 2017
ArBA	Arm-Iran Chal-BA	MBA/Trialeti-Vanadzor 2	1800-1600 BC	Karashamb	Armenia	MF362724.1	arm43_mt	U4a	Margaryan et al., 2017
ArBA	Arm-Iran Chal-BA	MBA/Trialeti-Vanadzor 2	1800-1600 BC	Karashamb	Armenia	MF362726.1	arm45_mt	T2b/T	Margaryan et al., 2017
ArBA	Arm-Iran Chal-BA	MBA/Trialeti-Vanadzor 2	1800-1600 BC	Karashamb	Armenia	MF362727.1	arm46_mt	HV1a1	Margaryan et al., 2017
ArBA	Arm-Iran Chal-BA	EBA/Kura-Araxes	3000-2800 BC	Sotk 2	Armenia	MF362733.1	arm5_mt	J1b1b1	Margaryan et al., 2017
ArBA	Arm-Iran Chal-BA	CHL/Chalcolithic	4486-4320 BC	Karintak	Artsakh	MF362732.1	arm52_mt	U8b1a1	Margaryan et al., 2017
ArIA	Armenian Iron Age-Medieval	Classical/Armenian	719-434 BC	Azatan	Armenia	MF362692.1	arm10_mt	H13a1a2	Margaryan et al., 2017
ArIA	Armenian Iron Age-Medieval	Medieval/Armenian	728-930 AD	Sotk 1	Armenia	MF362694.1	arm12_mt	J1d6	Margaryan et al., 2017
ArIA	Armenian Iron Age-Medieval	EIA/Lchashen-Metsamor	1100-900 BC	Metsamor	Armenia	MF362695.1	arm13_mt	U2e2a1	Margaryan et al., 2017
ArIA	Armenian Iron Age-Medieval	Medieval/Armenian	1700-1800 AD	Karkar	Artsakh	MF362696.1	arm14_mt	U1a1a	Margaryan et al., 2017
ArIA	Armenian Iron Age-Medieval	EIA/Lchashen-Metsamor	1300-1100 BC	Dari Glukh	Armenia	MF362706.1	arm24_mt	U5a1b	Margaryan et al., 2017
ArIA	Armenian Iron Age-Medieval	EIA/Lchashen-Metsamor	1300-1100 BC	Artsvaqar	Armenia	MF362707.1	arm26_mt	J1d1b1	Margaryan et al., 2017
ArIA	Armenian Iron Age-Medieval	EIA/Lchashen-Metsamor	1316-1070 BC	Artsvaqar	Armenia	MF362708.1	arm27_mt	HV	Margaryan et al., 2017
ArIA	Armenian Iron Age-Medieval	EIA/Lchashen-Metsamor	1100-900 BC	Akunk	Armenia	MF362719.1	arm37_mt	H	Margaryan et al., 2017
ArIA	Armenian Iron Age-Medieval	Classical/Armenian	100 BC-100 AD	Metsamor	Armenia	MF362730.1	arm4_mt	J1d1b1	Margaryan et al., 2017
ArIA	Armenian Iron Age-Medieval	LIA/Urartian	743-491 BC	Nerqin Naver	Armenia	MF362725.1	arm44_mt	U3b3	Margaryan et al., 2017
ArIA	Armenian Iron Age-Medieval	LIA/Urartian	700-500 BC	Nerqin Naver	Armenia	MF362728.1	arm48_mt	I4	Margaryan et al., 2017
ArIA	Armenian Iron Age-Medieval	LIA/Urartian	700-500 BC	Nerqin Naver	Armenia	MF362729.1	arm49_mt	I4	Margaryan et al., 2017
ArIA	Armenian Iron Age-Medieval	LIA/Urartian	700-500 BC	Nerqin Naver	Armenia	MF362731.1	arm51_mt	U3b3	Margaryan et al., 2017
BalBA	Baltic Late Bronze Age	Late Bronze Age	908-485 calBC	Turlojiske	Lithuania	RISE598		H/H2a2	Allentoft et al., 2015
BalBA	Baltic Late Bronze Age	Baltic Bronze Age	730-400 calBCE	Kivutkalns	Latvia	Kivutkalns19		H10a	Mittnik et al., 2017
BalBA	Baltic Late Bronze Age	Baltic Bronze Age	810-560 calBCE	Kivutkalns	Latvia	Kivutkalns42		H1b1	Mittnik et al., 2017
BalBA	Baltic Late Bronze Age	Baltic Bronze Age	730-390 calBCE	Kivutkalns	Latvia	Kivutkalns207		H1b2	Mittnik et al., 2017
BalBA	Baltic Late Bronze Age	Baltic Bronze Age	790-535 calBCE	Kivutkalns	Latvia	Kivutkalns215		H1c	Mittnik et al., 2017
BalBA	Baltic Late Bronze Age	Baltic Bronze Age	800-545 calBCE	Kivutkalns	Latvia	Kivutkalns25		H28a	Mittnik et al., 2017
BalBA	Baltic Late Bronze Age	Baltic Bronze Age	405-230 calBCE	Kivutkalns, Latvia	Latvia	Kivutkalns209		J1b1a1	Mittnik et al., 2017
BalBA	Baltic Late Bronze Age	Baltic Bronze Age	800-545 calBCE	Kivutkalns, Latvia	Latvia	Kivutkalns194		T1a1b	Mittnik et al., 2017
BalBA	Baltic Late Bronze Age	Baltic Bronze Age	805-515 calBCE	Kivutkalns, Latvia	Latvia	Kivutkalns222		U5a1c1	Mittnik et al., 2017
BalBA	Baltic Late Bronze Age	Bronze Age, Trzciniec culture (?)	908-485 calBCE	Turlojiškė II	Lithuania	TurlojiskeII4_Trzciniec		H	Mittnik et al., 2017
BalBA	Baltic Late Bronze Age	Bronze Age, Trzciniec culture (?)	1010-800 calBCE	Turlojiškė II	Lithuania	TurlojiskeII3_Trzciniec		H4a1a1a3	Mittnik et al., 2017
BalBA	Baltic Late Bronze Age	Bronze Age, Trzciniec culture (?)	2100/2000-600 (bronze age)	Turlojiškė1999	Lithuania	Turlojiske99.5_Trzciniec		H5	Mittnik et al., 2017
BalBA	Baltic Late Bronze Age	Bronze Age, Trzciniec culture (?)	2100/2000-600 BCE	Turlojiškė1948	Lithuania	Turlojiske1948_Trzciniec		T2b	Mittnik et al., 2017
BalBA	Baltic Late Bronze Age	Bronze Age, Trzciniec culture (?)	2100/2000-600 BCE	Turlojiškė 1999	Lithuania	Turlojiske99.6_Trzciniec		T2b	Mittnik et al., 2017
BalBA	Baltic Late Bronze Age	Bronze Age, Trzciniec culture (?)	930–810 calBCE	Turlojiškė96 (Kirsna III),	Lithuania	Turlojiske1996.1		T2b	Mittnik et al., 2017
BalBA	Baltic Late Bronze Age	Bronze Age, Trzciniec culture (?)	1230–920 calBCE	Turlojiškė (Kirsna1932)	Lithuania	Turlojiske1932_Trzciniec		U5a2a1	Mittnik et al., 2017
BalBA	Baltic Late Bronze Age	Late Bronze Age	800-545 calBCE	Kivutkalns	Latvia	Kivutkalns153		U5a1a1	Mittnik et al., 2017
BalBA	Baltic Late Bronze Age	Late Bronze Age	730-390 calBCE	Kivutkalns	Latvia	Kivutkalns164		U5a2a1	Mittnik et al., 2017
BellB	Bell_Beaker_LN	Bell_Beaker_LN	2900 – 1800 BC	Knezeves	Czech Republic	RISE566		H	Allentoft et al., 2015
BellB	Bell_Beaker_LN	Bell_Beaker_LN	2900 – 1800 BC	Brandysek	Czech Republic	RISE569		H1af	Allentoft et al., 2015
BellB	Bell_Beaker_LN	Bell_Beaker_LN	2900 – 1800 BC	Brandysek	Czech Republic	RISE568		H2a	Allentoft et al., 2015
BellB	Bell_Beaker_LN	Bell Baker	2600-1800 BC	Knezeves	Czech Republic	RISE567		U5b2c	Allentoft et al., 2015
BellB	Bell_Beaker_LN	Bell_Beaker_LN	no data	Landau an der Isar	Germany	RISE562		H2a1e	Allentoft et al., 2015
BellB	Bell_Beaker_LN	Bell_Beaker_LN	no data	Augsburg	Germany	RISE559		H46	Allentoft et al., 2015
BellB	Bell_Beaker_LN	Bell_Beaker_LN	no data	Osterhofen-Altenmarkt	Germany	RISE564		HV	Allentoft et al., 2015
BellB	Bell_Beaker_LN	Bell_Beaker_LN	no data	Osterhofen-Altenmarkt	Germany	RISE563		U	Allentoft et al., 2015
BellB	Bell_Beaker_LN	Bell_Beaker_LN	2467-2142 calBCE (Er8558)	Quedlinburg VII	Germany	I0805		H1	Haak et al., 2015; I. P. Lazaridis et al., 2016
BellB	Bell_Beaker_LN	Bell_Beaker_LN	2457-2142 calBCE (Er7038)	Quedlinburg XII	Germany	I0112		H13a1a2	Haak et al., 2015; I. P. Lazaridis et al., 2016
BellB	Bell_Beaker_LN	Bell_Beaker_LN	2475-2204 calBCE (Er8712)	Rothenschirmbach	Germany	I0111		H3ao	Haak et al., 2015; I. P. Lazaridis et al., 2016
BellB	Bell_Beaker_LN	Bell_Beaker_LN	2575-2299 calBCE (Er8710)	Rothenschirmbach	Germany	I0108		H5a3	Haak et al., 2015; I. P. Lazaridis et al., 2016
BellB	Bell_Beaker_LN	Bell_Beaker_LN	2346-2033 calBCE (Er7283)	Quedlinburg XII	Germany	I0113		J1c5	Haak et al., 2015; I. P. Lazaridis et al., 2016
BellB	Bell_Beaker_LN	Bell_Beaker_LN	2428-2149 calBCE (MAMS 22819)	Rothenschirmbach	Germany	I0060		K1a2c	Haak et al., 2015; I. P. Lazaridis et al., 2016
BellB	Bell_Beaker_LN	Bell_Beaker_LN	no data	Augsburg	Germany	RISE560		U5a1a1	Haak et al., 2015; I. P. Lazaridis et al., 2016
BellB	Bell_Beaker_LN	Bell_Beaker_LN	2431-2150 calBCE (MAMS 22820)	Quedlinburg VII	Germany	I0806		H1	Mathieson et al., 2015
BellB	Bell_Beaker_LN	Bell_Beaker_LN	2500-2050 BCE	Benzingerode-Heimburg	Germany	I1546		U5a1b1	Mathieson et al., 2015
BellB	Bell_Beaker_LN	Bell_Beaker_LN	2500-2050 BCE	Benzingerode-Heimburg	Germany	I1549		W1c1	Mathieson et al., 2015
BellB	Bell_Beaker_LN	Bell_Beaker_LN_1d_rel_I0111	2345-2198 calBCE (Er8715)	Rothenschirmbach	Germany	I1530		H3ao	Mathieson et al., 2015
BrMA	MA England	Anglo-Saxon	650–910 AD	Norton	England	Martiniano_2016_NO3423_Anglo-Saxon:ALL		H1a	Martiniano et al., 2016
BrMA	MA England	Roman	71-200 AD	York	England	Martiniano_2016_6DRIF_22:ALL		H	Martiniano et al., 2016
BrMA	MA England	Roman	71-200 AD	York	England	Martiniano_2016_6DRIF_18:ALL		H1bs	Martiniano et al., 2016
BrMA	MA England	Roman	71-200 AD	York	England	Martiniano_2016_3DRIF_26:ALL		H5	Martiniano et al., 2016
BrMA	MA England	Roman	71-200 AD	York	England	Martiniano_2016_6DRIF_23:ALL		H6a1b2	Martiniano et al., 2016
BrMA	MA England	Roman	71-200 AD	York	England	Martiniano_2016_6DRIF_3:ALL		J1b1a1e	Martiniano et al., 2016
BrMA	MA England	Roman	71-200 AD	York	England	Martiniano_2016_6DRIF_21:ALL		J1c3e2	Martiniano et al., 2016
BrMA	MA England	Anglo-Saxo period	400–545 CE	Oakington	England	15577A		H1at1	Schiffels et al., 2016
BrMA	MA England	Anglo-Saxo period	385–535 CE	Oakington	England	15569A		H1g1	Schiffels et al., 2016
BrMA	MA England	Anglo-Saxo period	666–770 CE	Hinxton	England	12881A		H2a2	Schiffels et al., 2016
BrMA	MA England	Anglo-Saxo period	631–776 CE	Hinxton	England	12883A		K1a4a1a2b	Schiffels et al., 2016
BrMA	MA England	Anglo-Saxo period	690–881 CE	Hinxton	England	12885A		rCRS	Schiffels et al., 2016
BrMA	MA England	Anglo-Saxo period	395–540 CE	Oakington	England	15570A		T2a1a	Schiffels et al., 2016
BrMA	MA England	Anglo-Saxo period	420–570 CE	Oakington	England	15558A		U5a2a1	Schiffels et al., 2016
Comb	Combed Ware Culture	Combed Ware Culture	4230–3810 calBCE	Kõljala	Estonia	Koljala1_CombedWare		U4a1	Mittnik et al., 2017
Comb	Combed Ware Culture	Combed Ware Culture	no data	Tamula	Estonia	Tamula17_CombedWare		U4a1	Mittnik et al., 2017
Comb	Combed Ware Culture	Combed Ware Culture	3770–3640 calBCE	Kõljala, Estonia	Estonia	Koljala3		U4a2	Mittnik et al., 2017
Comb	Combed Ware Culture	Combed Ware Culture	no data	Tamula	Estonia	Tamula3_CombedWare		U4d2	Mittnik et al., 2017
Comb	Combed Ware Culture	Combed Ware Culture	4340-4050 calBCE	Tamula	Estonia	Tamula8_CombedWare		U5a1d1	Mittnik et al., 2017
Comb	Combed Ware Culture	Combed Ware Culture	3630-3360 calBCE	Tamula	Estonia	Tamula1_CombedWare		U5a1d2b	Mittnik et al., 2017
Comb	Combed Ware Culture	Combed Ware Culture	3700–3520	Tamula	Estonia	Tamula22_CombedWare		U5a1d2b	Mittnik et al., 2017
Comb	Combed Ware Culture	Comb Ceramic Culture	3,900–3,800	Kudruküla	Estonia	Kudruküla3		U2e1	Saag et al., 2017
Comb	Combed Ware Culture	Comb Ceramic Culture	3,766–3,359 BCE	Kudruküla	Estonia	Kudruküla2		U4a	Saag et al., 2017
Comb	Combed Ware Culture	Comb Ceramic Culture	3,764–3,369 BCE	Kudruküla	Estonia	Kudruküla1_d		U5b1d1	Saag et al., 2017
Comb	Combed Ware Culture	Comb Ceramic Culture	3,764–3,369 BCE	Kudruküla	Estonia	Kudruküla1_r		U5b1d1	Saag et al., 2017
CWC	Northern Corded Ware	Corded Ware Culture	2580-2340 calBCE	Kunila,	Estonia	Kunila2_CordedWare		J1c3	Mittnik et al., 2017
CWC	Northern Corded Ware	Corded Ware Culture	2,783–1983 BCE	Ardu	Estonia	Ardu1_CordedWare		T2a1a	Mittnik et al., 2017
CWC	Northern Corded Ware	Corded Ware Culture	no data	Kunila, Estonia	Estonia	Kunila1_CordedWare		U5b1h	Mittnik et al., 2017
CWC	Northern Corded Ware	Corded Ware/Battle Axe culture	2860–2410 calBCE	Plinkaigalis	Lithuania	Plinkaigalis241_CordedWare		I2	Mittnik et al., 2017
CWC	Northern Corded Ware	Corded Ware/Battle Axe culture	2130–1750 calBCE	Spiginas	Lithuania	Spiginas2_CordedWare		I4a	Mittnik et al., 2017
CWC	Northern Corded Ware	Corded Ware/Battle Axe culture	2620–2470 calBCE	Gyvakarai	Lithuania	Gyvakarai1_CordedWare		K1b2a	Mittnik et al., 2017
CWC	Northern Corded Ware	Corded Ware/Battle Axe culture	2570–2350 calBCE	Biržai	Lithuania	Birzai1_CordedWare		U2e2a1	Mittnik et al., 2017
CWC	Northern Corded Ware	Corded Ware/Battle Axe culture	3260–2630 calBCE	Plinkaigalis	Lithuania	Plinkaigalis242_CordedWare		W6a	Mittnik et al., 2017
CWC	Northern Corded Ware	Corded Ware Culture	2575–2349 calBCE	Sope	Estonia	Sope1_CordedWare		H5a1	Mittnik et al., 2017
CWC	Northern Corded Ware	Corded Ware Culture	2,783–1983 BCE	Sope	Estonia	Sope_r		H5a1	Saag et al., 2017
CWC	Northern Corded Ware	Corded Ware Culture	2,783–1983 BCE	Ardu	Estonia	Ardu1_r		T2a1	Saag et al., 2017
CWC	Northern Corded Ware	Corded Ware Culture	2854-2488 BCE	Ardu	Estonia	Ardu2		U5b2c	Saag et al., 2017
EUEN	EN Europe	LBK_EN	5500-4800 BCE	Viesenhaeuser Hof, Stuttgart-Muehlhausen	Germany	I0025		T2b	Allentoft et al., 2015
EUEN	EN Europe	LBK_EN	5500-4800 BCE	Viesenhaeuser Hof, Stuttgart-Muehlhausen	Germany	I0026		T2b	Allentoft et al., 2015
EUEN	EN Europe	LBK_EN	5500-4800 BCE	Viesenhaeuser Hof, Stuttgart-Muehlhausen	Germany	I0022		T2e	Allentoft et al., 2015
EUEN	EN Europe	Neolithic	3418 ± 63 calBC	Blätterhöhle	Germany	Bollongino_2013_BLA10:ALL		H1c3	Bollongino et al., 2013
EUEN	EN Europe	Neolithic	3513 ± 102 calBC	Blätterhöhle	Germany	Bollongino_2013_BLA13:ALL		H5	Bollongino et al., 2013
EUEN	EN Europe	Neolithic	3666 ± 20 calBC	Blätterhöhle	Germany	Bollongino_2013_BLA7:ALL		H5	Bollongino et al., 2013
EUEN	EN Europe	Neolithic	3922 ± 60 calBC	Blätterhöhle	Germany	Bollongino_2013_BLA11:ALL		U5b2b2	Bollongino et al., 2013
EUEN	EN Europe	Neolithic	3604 ± 49 calBC	Blätterhöhle	Germany	Bollongino_2013_BLA14:ALL		U5b2b2	Bollongino et al., 2013
EUEN	EN Europe	Central_MN	2903-2806 calBCE (MAMS-14825)	Apc-Berekalya I	Hungary	I1497		H	Gamba et al., 2014
EUEN	EN Europe	Hungary_EN	5291-5144 calBCE (OxA-27858)	Debrecen Tocopart Erdoalja	Hungary	I1498		H	Gamba et al., 2014
EUEN	EN Europe	Hungary_EN	5295-5116 calBCE (OxA-23763)	Kompolt-Kigyoser	Hungary	I1500		J1c1	Gamba et al., 2014
EUEN	EN Europe	Hungary_EN	5211-5116 calBCE (OxA-28020)	Polgar Ferenci hat	Hungary	I1505		J1c5	Gamba et al., 2014
EUEN	EN Europe	Hungary_EN	5206-5002 calBCE (MAMS-14821)	Apc-Berekalya I	Hungary	I1496		K1a3a3	Gamba et al., 2014
EUEN	EN Europe	Hungary_EN	5306-5229 calBCE (OxA-27861)	Polgar Ferenci hat	Hungary	I1506		U5b2c	Gamba et al., 2014
EUEN	EN Europe	Hungary_EN	5281-5132 calBCE (OxA-27732)	Garadna	Hungary	I1499		X2b	Gamba et al., 2014
EUEN	EN Europe	Central_MN	3970-3710 calBCE (Er7784)	Esperstedt	Germany	I0807		H1e1a	Haak et al., 2015; I. P. Lazaridis et al., 2016
EUEN	EN Europe	Central_MN	3652-3527 calBCE (MAMS 22818)	Quedlinburg IX	Germany	I0559		HV	Haak et al., 2015; I. P. Lazaridis et al., 2016
EUEN	EN Europe	Central_MN	3360-3086 calBCE (Er8699)	Esperstedt	Germany	I0172		T2b	Haak et al., 2015; I. P. Lazaridis et al., 2016
EUEN	EN Europe	Central_MN	3640-3376 calBCE (Er7856)	Quedlinburg IX	Germany	I0560		T2e1	Haak et al., 2015; I. P. Lazaridis et al., 2016
EUEN	EN Europe	Hungary_EN	5713-5643 calBCE (OxA-28101)	Berettyóújfalu-Morotva-Liget:	Hungary	I1508		K1a	Haak et al., 2015; I. P. Lazaridis et al., 2016
EUEN	EN Europe	Hungary_EN	5702-5536 calBCE (MAMS 11939 )	Alsonyek-Bataszek, Mernoki telep	Hungary	I0174		N1a1a1	Haak et al., 2015; I. P. Lazaridis et al., 2016
EUEN	EN Europe	Hungary_EN	5207-4944 calBCE (Beta - 310038)	Szemely-Hegyes	Hungary	I0176		N1a1a1a3	Haak et al., 2015; I. P. Lazaridis et al., 2016
EUEN	EN Europe	LBK_EN	5216-5036 calBCE (MAMS 22823)	Karsdorf	Germany	I0795		H1	Haak et al., 2015; I. P. Lazaridis et al., 2016
EUEN	EN Europe	LBK_EN	5222-5022 calBCE (MAMS 21485)	Unterwiederstedt	Germany	I0054		J1c17	Haak et al., 2015; I. P. Lazaridis et al., 2016
EUEN	EN Europe	LBK_EN	5211-4963 calBCE (KIA40350)	Halberstadt-Sonntagsfeld	Germany	I0659		N1a1a1a2	Haak et al., 2015; I. P. Lazaridis et al., 2016
EUEN	EN Europe	LBK_EN	5212-4989 calBCE (MAMS 21479)	Halberstadt-Sonntagsfeld	Germany	I0046		T2c1	Haak et al., 2015; I. P. Lazaridis et al., 2016
EUEN	EN Europe	LBK_EN	5201-4850 calBCE (KIA40348)	Halberstadt-Sonntagsfeld	Germany	I0821		X2d1	Haak et al., 2015; I. P. Lazaridis et al., 2016
EUEN	EN Europe	Neolithic post-LBK	no data	Krusza Zamkowa	Poland	KX450779.1		H3d	Juras, Chyleński, et al., 2017
EUEN	EN Europe	Neolithic post-LBK	4329–3997 calBC	Krusza Zamkowa	Poland	KX450780.1		K1a4	Juras, Chyleński, et al., 2017
EUEN	EN Europe	Neolithic post-LBK	4331–4057 calBC	Krusza Zamkowa	Poland	KX450778.1		K1c	Juras, Chyleński, et al., 2017
EUEN	EN Europe	Neolithic post-LBK	4332–4066 calBC	Krusza Zamkowa	Poland	KX450777.1		U5b2a1a	Juras, Chyleński, et al., 2017
EUEN	EN Europe	LBK_EN	5000-5000 BCE	Viesenhaeuser Hof, Stuttgart-Muehlhausen	Germany	Stuttgart		T2c1d1	I. Lazaridis et al., 2014
EUEN	EN Europe	Central_MN	3400-3025 BCE	Salzmuende-Schiebzig	Germany	I0551		U3a1	Mathieson et al., 2015
EUEN	EN Europe	Hungary_EN	4491-4416 calBCE (MAMS-14819)	Apc-Berekalya I	Hungary	I1495		N1a1a1a2	Mathieson et al., 2015
EUEN	EN Europe	LBK_EN	5500-4775 BCE	Karsdorf	Germany	I0797		H46b	Mathieson et al., 2015
EUEN	EN Europe	LBK_EN	5211-5009 calBCE (MAMS 21482)	Halberstadt-Sonntagsfeld	Germany	I0048		K1a	Mathieson et al., 2015
EUEN	EN Europe	LBK_EN	5500-4775 BCE	Halberstadt-Sonntagsfeld	Germany	I1550		K1a2	Mathieson et al., 2015
EUEN	EN Europe	LBK_EN	5218-5019 calBCE (MAMS 21483)	Halberstadt-Sonntagsfeld	Germany	I0057		N1a1a1	Mathieson et al., 2015
EUEN	EN Europe	LBK_EN	5202-4852 calBCE (KIA40341)	Halberstadt-Sonntagsfeld	Germany	I0100		N1a1a1a	Mathieson et al., 2015
EUEN	EN Europe	LBK_EN	5212-5006calBCE (MAMS 21480)	Halberstadt-Sonntagsfeld	Germany	I0056		T2b	Mathieson et al., 2015
EULNBA	Central_LNBA	Central_LNBA	no data	Sope	Estonia	RISE00		H5a1	Allentoft et al., 2015
EULNBA	Central_LNBA	Central_LNBA	2863-2498 calBCE (UBA-27947)	Tiefbrunn	Germany	RISE435		J1b1a1	Allentoft et al., 2015
EULNBA	Central_LNBA	Central_LNBA	1925-1765 calBCE (Uba-16555)	Szczepankowice	Poland	RISE154		K1a4a1	Allentoft et al., 2015
EULNBA	Central_LNBA	Central_LNBA	2500-2050 BCE	Esperstedt	Germany	I1542		K1b1a	Allentoft et al., 2015
EULNBA	Central_LNBA	Central_LNBA	no data	Moravska Nova Ves	Czech Republic	RISE586		K1c	Allentoft et al., 2015
EULNBA	Central_LNBA	Central_LNBA	2868-2580 calBCE (UBA-27948)	Tiefbrunn	Germany	RISE436		R11'B6	Allentoft et al., 2015
EULNBA	Central_LNBA	Central_LNBA	2880-2630 calBCE (UBA-27946)	Tiefbrunn	Germany	RISE434		U4	Allentoft et al., 2015
EULNBA	Central_LNBA	Central_LNBA	1954-1772 calBCE (UB-16557)	Wojkowice	Poland	RISE109		U4	Allentoft et al., 2015
EULNBA	Central_LNBA	Central_LNBA	1885-1693 calBCE (Ua-42401)	Przeclawice	Poland	RISE150		U5a1b1	Allentoft et al., 2015
EULNBA	Central_LNBA	Central_LNBA	2829-2465 calBCE (UBA-27950)	Bergrheinfeld	Germany	RISE446		U5b1c2	Allentoft et al., 2015
EULNBA	Central_LNBA	Central_LNBA_outlier	no data	Untermeitingen	Germany	RISE471		J1c1b	Allentoft et al., 2015
EULNBA	Central_LNBA	Corded Ware	2865-2578 calBC	Oblaczkowo	Poland	RISE1		K2a10/K1b1a1	Allentoft et al., 2015
EULNBA	Central_LNBA	Unetice	2188-1958 calBC	Polwica	Poland	RISE145		H6a1b	Allentoft et al., 2015
EULNBA	Central_LNBA	Unetice	2135-1923 calBC	Chociwel	Poland	RISE139		L3/U2e1f1	Allentoft et al., 2015
EULNBA	Central_LNBA	Central_LNBA	2337-2138 calBCE (MAMS 21486)	Benzingerode-Heimburg	Germany	I0059		H1	Haak et al., 2015; I. P. Lazaridis et al., 2016
EULNBA	Central_LNBA	Central_LNBA	1193-979 calBCE (MAMS 21484)	Halberstadt-Sonntagsfeld	Germany	I0099		H23	Haak et al., 2015; I. P. Lazaridis et al., 2016
EULNBA	Central_LNBA	Central_LNBA	2137-1965 calBCE (MAMS 22821)	Eulau	Germany	I0804		H3	Haak et al., 2015; I. P. Lazaridis et al., 2016
EULNBA	Central_LNBA	Central_LNBA	2132-1942 calBCE (MAMS 22822)	Eulau	Germany	I0803		H4a1a1a	Haak et al., 2015; I. P. Lazaridis et al., 2016
EULNBA	Central_LNBA	Central_LNBA	2471-2246 calBCE (MAMS 21492)	Alberstedt	Germany	I0118		HV	Haak et al., 2015; I. P. Lazaridis et al., 2016
EULNBA	Central_LNBA	Central_LNBA	2464-2210 calBCE (MAMS 21489)	Esperstedt	Germany	I0049		HV2	Haak et al., 2015; I. P. Lazaridis et al., 2016
EULNBA	Central_LNBA	Central_LNBA	2272-2039 calBCE (MAMS 21496)	Esperstedt	Germany	I0117		I3a	Haak et al., 2015; I. P. Lazaridis et al., 2016
EULNBA	Central_LNBA	Central_LNBA	2570-2471 calBCE (MAMS 23344)	Karsdorf	Germany	I0550		T1a1	Haak et al., 2015; I. P. Lazaridis et al., 2016
EULNBA	Central_LNBA	Central_LNBA	2464-2210 calBCE (MAMS 21490)	Esperstedt	Germany	I0106		T2a1b1	Haak et al., 2015; I. P. Lazaridis et al., 2016
EULNBA	Central_LNBA	Central_LNBA	no data	Velke Prilepy	Czech Republic	RISE577		T2b2b	Haak et al., 2015; I. P. Lazaridis et al., 2016
EULNBA	Central_LNBA	Central_LNBA	2286-2048 calBCE (OxA-27967)	Leki Male	Poland	RISE431		T2e	Haak et al., 2015; I. P. Lazaridis et al., 2016
EULNBA	Central_LNBA	Central_LNBA	2559-2296 calBCE (MAMS 21487)	Esperstedt	Germany	I0104		U4b1a1a1	Haak et al., 2015; I. P. Lazaridis et al., 2016
EULNBA	Central_LNBA	Central_LNBA	2287-2041 calBCE (KIA27952 )	Benzingerode-Heimburg	Germany	I0171		U5a1a2a	Haak et al., 2015; I. P. Lazaridis et al., 2016
EULNBA	Central_LNBA	Central_LNBA	1954-1760 calBCE (MAMS 21494)	Esperstedt	Germany	I0115		U5a1i	Haak et al., 2015; I. P. Lazaridis et al., 2016
EULNBA	Central_LNBA	Central_LNBA	2023-1894 calBCE (MAMS 21497)	Quedlinburg VIII	Germany	I0164		U5b2a1b	Haak et al., 2015; I. P. Lazaridis et al., 2016
EULNBA	Central_LNBA	Central_LNBA	2111-1891 calBCE (MAMS 21481)	Halberstadt-Sonntagsfeld	Germany	I0047		V9	Haak et al., 2015; I. P. Lazaridis et al., 2016
EULNBA	Central_LNBA	Central_LNBA	2134-1939 calBCE (MAMS 21495)	Esperstedt	Germany	I0116		W3a1	Haak et al., 2015; I. P. Lazaridis et al., 2016
EULNBA	Central_LNBA	Central_LNBA	2578-2468 calBCE (MAMS 21488)	Esperstedt	Germany	I0103		W6	Haak et al., 2015; I. P. Lazaridis et al., 2016
EULNBA	Central_LNBA	Central_LNBA_1d_rel_I0117	2138-1952 calBCE (MAMS 21493)	Esperstedt	Germany	I0114		I3a	Haak et al., 2015; I. P. Lazaridis et al., 2016
EULNBA	Central_LNBA	Central_LNBA	2625-2291 calBCE (Er7779)	Esperstedt	Germany	I1539		J1c1b1a	Mathieson et al., 2015
EULNBA	Central_LNBA	Central_LNBA	2500-2050 BCE	Esperstedt	Germany	I1532		J1c2e	Mathieson et al., 2015
EULNBA	Central_LNBA	Central_LNBA	2500-2050 BCE	Esperstedt	Germany	I1544		J1c3j	Mathieson et al., 2015
EULNBA	Central_LNBA	Central_LNBA	2500-2050 BCE	Esperstedt	Germany	I1538		J1c5	Mathieson et al., 2015
EULNBA	Central_LNBA	Central_LNBA	2500-2050 BCE	Esperstedt	Germany	I1540		J1c5f	Mathieson et al., 2015
EULNBA	Central_LNBA	Central_LNBA	2500-2050 BCE	Esperstedt	Germany	I1534		K1a1b2a	Mathieson et al., 2015
EULNBA	Central_LNBA	Central_LNBA	2500-2050 BCE	Esperstedt	Germany	I1536		U5a1g2	Mathieson et al., 2015
EULNBA	Central_LNBA	Central_LNBA_1d_rel_I1538+I1540	2500-2050 BCE	Esperstedt	Germany	I1541		U2e1a1	Mathieson et al., 2015
HuBA	Hungary_BA	Hungary_BA	1746-1611 calBCE (OxA-29769)	Százhalombatta-Földvár	Hungary	RISE247		H11a2	Allentoft et al., 2015
HuBA	Hungary_BA	Hungary_BA	no data	Erd 4	Hungary	RISE483		H2a1	Allentoft et al., 2015
HuBA	Hungary_BA	Hungary_BA	2128-1909 calBCE (OxA-29842)	Százhalombatta-Földvár	Hungary	RISE254		J1c9	Allentoft et al., 2015
HuBA	Hungary_BA	Hungary_BA	1886-1696 calBCE (OxA-31104)	Szöreg - C (Sziv Utca)	Hungary	RISE373		K1a2a	Allentoft et al., 2015
HuBA	Hungary_BA	Hungary_BA	no data	Erd 4	Hungary	RISE484		T1	Allentoft et al., 2015
HuBA	Hungary_BA	Hungary_BA	2034-1784 calBCE (OxA-30987)	Battonya Vörös Oktober	Hungary	RISE349		T2b3	Allentoft et al., 2015
HuBA	Hungary_BA	Hungary_BA	no data	Erd 4	Hungary	RISE480		U5a2a	Allentoft et al., 2015
HuBA	Hungary_BA	Hungary_BA	2136-1941 calBCE (OxA-30988)	Szöreg - C (Sziv Utca)	Hungary	RISE371		U5a2b	Allentoft et al., 2015
HuBA	Hungary_BA	Hungary_BA	1266-1181 calBCE (OxA-27859)	Ludas-Varju-Dulo	Hungary	I1504		K1a1a	Gamba et al., 2014
HuBA	Hungary_BA	Hungary_BA	2194-2082 calBCE (OxA-23799)	Kompolt-Kigyoser	Hungary	I1502		K1c1	Gamba et al., 2014
HuBA	Hungary_BA	Hungary_BA	no data	Erd 4	Hungary	RISE479		T2b	Haak et al., 2015; I. P. Lazaridis et al., 2016
HuBA	Hungary_BA	Hungary_BA	1866-1619 calBCE (OxA-30989)	Szöreg - C (Sziv Utca)	Hungary	RISE374		T2b2b	Haak et al., 2015; I. P. Lazaridis et al., 2016
IbCh	Chalcolithic Iberian	Iberia_Chalcolithic	2880-2630 BCE (Beta-296225 and Beta-296227)	El Mirador Cave, Atapuerca, Burgos	Spain	I1271		K1a	Gamba et al., 2014
IbCh	Chalcolithic Iberian	Iberia_Chalcolithic	4,957–4,821 yBP	El Portalón	Spain	Gunther_2015_ATP17:ALL		H3	Günther et al., 2015
IbCh	Chalcolithic Iberian	Iberia_Chalcolithic	4,960–4,829 yBP	El Portalón	Spain	Gunther_2015_ATP12_1420:ALL		H3c	Günther et al., 2015
IbCh	Chalcolithic Iberian	Iberia_Chalcolithic	5,295–4,894 yBP	El Portalón	Spain	Gunther_2015_ATP7:ALL		J1c1b1	Günther et al., 2015
IbCh	Chalcolithic Iberian	Iberia_Chalcolithic	5,466–5,312 yBP	El Portalón	Spain	Gunther_2015_ATP3:ALL		K1a2b	Günther et al., 2015
IbCh	Chalcolithic Iberian	Iberia_Chalcolithic	4,239–4,000 yBP	El Portalón	Spain	Gunther_2015_ATP20:ALL		U5a1c1a	Günther et al., 2015
IbCh	Chalcolithic Iberian	Iberia_Chalcolithic	4,849–4,628 yBP	El Portalón	Spain	Gunther_2015_ATP2:ALL		U5b3	Günther et al., 2015
IbCh	Chalcolithic Iberian	Iberia_Chalcolithic	5,211–4,866 yBP	El Portalón	Spain	Gunther_2015_ATP16:ALL		X2c2	Günther et al., 2015
IbCh	Chalcolithic Iberian	Iberia_Chalcolithic	2880-2630 BCE (Beta-296225 and Beta-296227)	El Mirador Cave, Atapuerca, Burgos	Spain	I1300		K1a2a	Haak et al., 2015; I. P. Lazaridis et al., 2016
IbCh	Chalcolithic Iberian	Iberia_Chalcolithic	2880-2630 BCE (Beta-296225 and Beta-296227)	El Mirador Cave, Atapuerca, Burgos	Spain	I1272		K1b1a	Haak et al., 2015; I. P. Lazaridis et al., 2016
IbCh	Chalcolithic Iberian	Iberia_Chalcolithic	2880-2630 BCE (Beta-296225 and Beta-296227)	El Mirador Cave, Atapuerca, Burgos	Spain	I1281		H1t	Mathieson et al., 2015
IbCh	Chalcolithic Iberian	Iberia_Chalcolithic	2880-2630 BCE (Beta-296225 and Beta-296227)	El Mirador Cave, Atapuerca, Burgos	Spain	I1277		H3	Mathieson et al., 2015
IbCh	Chalcolithic Iberian	Iberia_Chalcolithic	2880-2630 BCE (Beta-296225 and Beta-296227)	El Mirador Cave, Atapuerca, Burgos	Spain	I1282		H3	Mathieson et al., 2015
IbCh	Chalcolithic Iberian	Iberia_Chalcolithic	2880-2630 BCE (Beta-296225 and Beta-296227)	El Mirador Cave, Atapuerca, Burgos	Spain	I1284		H3	Mathieson et al., 2015
IbCh	Chalcolithic Iberian	Iberia_Chalcolithic	2880-2630 BCE (Beta-296225 and Beta-296227)	El Mirador Cave, Atapuerca, Burgos	Spain	I1276		H3c3	Mathieson et al., 2015
IbCh	Chalcolithic Iberian	Iberia_Chalcolithic	2880-2630 BCE (Beta-296225 and Beta-296227)	El Mirador Cave, Atapuerca, Burgos	Spain	I1280		J1c1	Mathieson et al., 2015
IbCh	Chalcolithic Iberian	Iberia_Chalcolithic	2880-2630 BCE (Beta-296225 and Beta-296227)	El Mirador Cave, Atapuerca, Burgos	Spain	I1314		J2a1a1	Mathieson et al., 2015
IbCh	Chalcolithic Iberian	Iberia_Chalcolithic	2880-2630 BCE (Beta-296225 and Beta-296227)	El Mirador Cave, Atapuerca, Burgos	Spain	I1303		U3a1	Mathieson et al., 2015
IbCh	Chalcolithic Iberian	Iberia_Chalcolithic	2880-2630 BCE (Beta-296225 and Beta-296227)	El Mirador Cave, Atapuerca, Burgos	Spain	I0581		X2b	Mathieson et al., 2015
IbCh	Chalcolithic Iberian	Iberia_Chalcolithic_1d_rel_I1277	2880-2630 BCE (Beta-296225 and Beta-296227)	El Mirador Cave, Atapuerca, Burgos	Spain	I1274		H3	Mathieson et al., 2015
IbCh	Chalcolithic Iberian	Iberia_Chalcolithic_1d_rel_I1314	2880-2630 BCE (Beta-296225 and Beta-296227)	El Mirador Cave, Atapuerca, Burgos	Spain	I1302		J2b1a3	Mathieson et al., 2015
IbN	Iberia Neolithic	Iberian_BA	3,700–3,568 yBP	El Portalón	Spain	Gunther_2015_ATP9:ALL		U5b1b	Günther et al., 2015
IbN	Iberia Neolithic	Iberia_EN	5310-5218 calBCE (MAMS 16159)	Els Trocs	Spain	I0409		J1c3	Haak et al., 2015; I. P. Lazaridis et al., 2016
IbN	Iberia Neolithic	Iberia_EN	5295-5066 calBCE (MAMS 16161)	Els Trocs	Spain	I0410		T2c1d or T2c1d2	Haak et al., 2015; I. P. Lazaridis et al., 2016
IbN	Iberia Neolithic	Iberia_EN	5302-5074 calBCE (MAMS 16166)	Els Trocs	Spain	I0413		V	Haak et al., 2015; I. P. Lazaridis et al., 2016
IbN	Iberia Neolithic	Iberia_MN	3900-3600 BCE	La Mina	Spain	I0406		H1	Haak et al., 2015; I. P. Lazaridis et al., 2016
IbN	Iberia Neolithic	Iberia_MN	3900-3600 BCE	La Mina	Spain	I0405		K1a1b1	Haak et al., 2015; I. P. Lazaridis et al., 2016
IbN	Iberia Neolithic	Iberia_MN	3900-3600 BCE	La Mina	Spain	I0408		U5b1	Haak et al., 2015; I. P. Lazaridis et al., 2016
IbN	Iberia Neolithic	Iberia_EN	5308-5080 calBCE (MAMS 16164)	Els Trocs	Spain	I0412		N1a1a1	Mathieson et al., 2015
IbN	Iberia Neolithic	Iberia_EN_1d_rel_I0410	5295-5067 calBCE (MAMS 16162)	Els Trocs	Spain	I0411		K1a2a	Mathieson et al., 2015
IbN	Iberia Neolithic	Iberia_MN	3900-3600 BCE	La Mina	Spain	I0407		K1b1a1	Mathieson et al., 2015
Kar	Karasuk	Karasuk	no data	Arban 3	Russia	RISE497		A	Allentoft et al., 2015
Kar	Karasuk	Karasuk	1531-1427 calBC	Sabinka 2	Russia	RISE493		M1/C4a1c	Allentoft et al., 2015
Kar	Karasuk	Karasuk	no data	Arban 1	Russia	RISE495		D4j1	Allentoft et al., 2015
Kar	Karasuk	Karasuk	no data	Bystrovka	Russia	RISE499		H5a1	Allentoft et al., 2015
Kar	Karasuk	Karasuk	1416-1268 calBC	Sabinka 2	Russia	RISE494		I4a1	Allentoft et al., 2015
Kar	Karasuk	Karasuk	1414-1261 calBC	Arban 2	Russia	RISE496		U5a1a2a	Allentoft et al., 2015
Kar	Karasuk	Karasuk	1496-1306 calBC	Bystrovka	Russia	RISE502		U5a1d	Allentoft et al., 2015
MesA	Mesolithic	Mesolithic	8652 ± 58 calBC	Blätterhöhle	Germany	Bollongino_2013_BLA20:ALL		U5a2c3	Bollongino et al., 2013
MesA	Mesolithic	Mesolithic_HG	no data	Onega Lake	Russia	Karelia_UzOO74		C1f	Der Sarkissian et al., 2015
MesA	Mesolithic	WHG	5781-5715 calBCE (OxA-23757)	Tiszaszolos-Domahaza	Hungary	I1507		R1b1	Gamba et al., 2014
MesA	Mesolithic	EHG	5500-5000 BCE	Yuzhnyy Oleni Ostrov, Karelia	Russia	I0061		C1	Haak et al., 2015; I. P. Lazaridis et al., 2016
MesA	Mesolithic	EHG	5650-5555 calBCE (Beta 392490)	Lebyanzhinka IV, Sok River, Samara	Russia	I0124		U5a1d	Haak et al., 2015; I. P. Lazaridis et al., 2016
MesA	Mesolithic	Motala_HG	5898-5531 calBCE	Motala	Sweden	I0012		U2e1	Haak et al., 2015; I. P. Lazaridis et al., 2016
MesA	Mesolithic	Motala_HG	5898-5531 calBCE	Motala	Sweden	I0017		U2e1	Haak et al., 2015; I. P. Lazaridis et al., 2016
MesA	Mesolithic	Motala_HG	5898-5531 calBCE	Motala	Sweden	I0014		U5a2d	Haak et al., 2015; I. P. Lazaridis et al., 2016
MesA	Mesolithic	Motala_HG	5898-5531 calBCE	Motala	Sweden	I0015		U5a2d	Haak et al., 2015; I. P. Lazaridis et al., 2016
MesA	Mesolithic	Mesolithic	7,605–7,529 calBCE	Theopetra	Greece	KU171094.1		K1c	Hofmanova, Kreutzer, Hallenthal, Sell, & Diekmann, 2016
MesA	Mesolithic	Mesolithic	7,288–6,771 calBCE	Theopetra	Greece	KU171095.1		K1c	Hofmanova, Kreutzer, Hallenthal, Sell, & Diekmann, 2016
MesA	Mesolithic	Mesolithic	9800 cal BP	Kotias Kide	Georgia	Jones_2015_Kotias:ALL		H13c	Jones et al., 2015
MesA	Mesolithic	WHG	6220-5990 calBCE	Echternach	Luxembourg	Loschbour		U5b1a	I. Lazaridis et al., 2014
MesA	Mesolithic	Israel_Natufian	11840-9760 BCE	Raqefet Cave	Israel	S1685		J/J2a2	I. P. Lazaridis et al., 2016
MesA	Mesolithic	Israel_Natufian	11840-9760 BCE	Raqefet Cave	Israel	S0861		J2a2	I. P. Lazaridis et al., 2016
MesA	Mesolithic	Israel_Natufian	11840-9760 BCE	Raqefet Cave	Israel	S1072 and S1692		N1b	I. P. Lazaridis et al., 2016
MesA	Mesolithic	EHG	5500-5000 BCE	Yuzhnyy Oleni Ostrov, Karelia	Russia	I0211		U4a	Mathieson et al., 2015
MesA	Mesolithic	Motala_HG	5898-5531 calBCE	Motala	Sweden	I0011		U5a1	Mathieson et al., 2015
MesA	Mesolithic	Motala_HG	5898-5531 calBCE	Motala	Sweden	I0013		U5a1	Mathieson et al., 2015
MesA	Mesolithic	Kunda culture	6075–5920 calBCE	Donkalnis	Lithuania	Donkalnis5_Kunda		K1b2	Mittnik et al., 2017
MesA	Mesolithic	Kunda culture	6440–6230 calBCE	Spiginas	Lithuania	Spiginas4_Kunda		U4a	Mittnik et al., 2017
MesA	Mesolithic	Kunda culture	6000–5740 calBCE	Donkalnis	Lithuania	Donkalnis4_Kunda		U5b2c1	Mittnik et al., 2017
MesA	Mesolithic	Mesolithic Hunter-Gatherer	5500-5000 BCE	Yuzhnyy Oleni Ostrov	Karelia, Russia	UzOO77_EHG		R1b	Mittnik et al., 2017
MesA	Mesolithic	Mesolithic Hunter-Gatherer	no data	Popovo, Karelia	Russia	Popovo2_EHG		U4d	Mittnik et al., 2017
MesA	Mesolithic	Mesolithic Hunter-Gatherer	5722-5564 calBCE	Kanaljorden, Motala,	Sweden	Motala1913_SHG		U5a2d	Mittnik et al., 2017
MesA	Mesolithic	WHG	5990-5740 calBCE (Beta-226472)	La Brana-Arintero, Leon	Spain	I0585		U5b2c	Olalde et al., 2014
MesA	Mesolithic	Mesolithic_HG	7000 cal BP	La Braña	Spain	LaBrana1		U5b2c1	Olalde et al., 2014
MesA	Mesolithic	Mesolithic	8870±130 calBP	Les Closeaux	France	LesCloseaux3	KU534958.1	U5a2	Posth et al., 2016
MesA	Mesolithic	Mesolithic	8320±90 calBP	Les Vignolles	France	MareuilLesMeaux1	KU534959.1	U5a2	Posth et al., 2016
MesA	Mesolithic	Mesolithic	7770 ± 120 calBP	Felsdach Inzigofen	Germany	Felsdach	KU534954.1	U5a2c	Posth et al., 2016
MesA	Mesolithic	Mesolithic	6325±35 calBP	Le Vieux Tordoir (Berry-au-Bac)	France	BerryAuBac1	KU534977.1	U5b1a	Posth et al., 2016
MesA	Mesolithic	Mesolithic	7400±60 calBP	Les Fontinettes (Cuiry-lès-Chaudardes)	France	CuiryLesChaudardes1	KU534975.1	U5b1b	Posth et al., 2016
MesA	Mesolithic	Mesolithic	7480±80 calBP	Große Ofnet Höhle	Germany	Ofnet	KU534974.1	U5b1d1	Posth et al., 2016
MesA	Mesolithic	Mesolithic	8985±40 calBP	L'abri des "Cabônes"	France	Ranchot88	KU534978.1	U5b1h	Posth et al., 2016
MesA	Mesolithic	Mesolithic	8185±80 calBP	Falkensteiner Höhle	Germany	Falkenstein	KU534980.1	U5b2a1a1b	Posth et al., 2016
MesA	Mesolithic	Mesolithic	7835±80 calBP	Hohlenstein-Stadel	Germany	HohlensteinStadel	KU534979.1	U5b2c1	Posth et al., 2016
MesA	Mesolithic	Mesolithic	12470±65 calBP	Brillenhöhle	Germany	Brillenhohle	KU534947.1	U8a	Posth et al., 2016
Nar	Narva Culture Baltic ceramist hunter-gatherers	Narva culture	4440–4240 calBCE	Spiginas	Lithuania	Spiginas1_Narva		H11a	Mittnik et al., 2017
Nar	Narva Culture Baltic ceramist hunter-gatherers	Narva Culture	no data	Kivasaare	Estonia	Kivisaare3a_Narva		U4a1	Mittnik et al., 2017
Nar	Narva Culture Baltic ceramist hunter-gatherers	Narva Culture	4730–4540 calBCE	Kivasaare	Estonia	Kivisaare3_Narva		U4a1	Mittnik et al., 2017
Nar	Narva Culture Baltic ceramist hunter-gatherers	Narva Culture	4360-4230 calBCE	Kivasaare	Estonia	Kivisaare4_Narva		U5a2d	Mittnik et al., 2017
Nar	Narva Culture Baltic ceramist hunter-gatherers	Narva culture	5460–4940 calBCE	Donkalnis	Lithuania	Donkalnis7_Narva		U5a2d1	Mittnik et al., 2017
Nar	Narva Culture Baltic ceramist hunter-gatherers	Narva culture	4720–4530 calBCE	Donkalnis	Lithuania	Donkalnis6_Narva		U5a2e	Mittnik et al., 2017
Nar	Narva Culture Baltic ceramist hunter-gatherers	Narva culture	no data	Donkalnis	Lithuania	Donkalnis1_Narva		U5b1	Mittnik et al., 2017
Nar	Narva Culture Baltic ceramist hunter-gatherers	Narva culture	4460–3820 calBCE	Kretuonas 1B	Lithuania	Kretuonas1_Narva		U5b1	Mittnik et al., 2017
Nar	Narva Culture Baltic ceramist hunter-gatherers	Narva Culture	4490–4340 calBCE	Veibri	Estonia	Veibri1_Narva		U5b1	Mittnik et al., 2017
Nar	Narva Culture Baltic ceramist hunter-gatherers	Narva Culture	4900–4720 calBCE	Veibri	Estonia	Veibri4_Narva		U5b1	Mittnik et al., 2017
Nar	Narva Culture Baltic ceramist hunter-gatherers	Narva culture	5500/5300-3100/2900 BCE	Kretuonas 1B	Lithuania	Kretuonas4_Narva		U5b1b1a	Mittnik et al., 2017
Nar	Narva Culture Baltic ceramist hunter-gatherers	Narva culture	5500/5300-3100/2900	Kretuonas 1B	Lithuania	Kretuonas2_Narva		U5b2b	Mittnik et al., 2017
Nar	Narva Culture Baltic ceramist hunter-gatherers	Narva culture	4450–4340 calBCE	Kretuonas 1B	Lithuania	Kretuonas5_Narva		U5b2b	Mittnik et al., 2017
Nar	Narva Culture Baltic ceramist hunter-gatherers	Narva Culture/ Combed Ware Culture	5310–5060 calBCE	Kõnnu	Estonia	Konnu2a		U2e2a	Mittnik et al., 2017
Nar	Narva Culture Baltic ceramist hunter-gatherers	Narva Culture/ Combed Ware Culture	no data	Kõnnu	Estonia	Konnu1_Narva-CombedWare		U5b1a	Mittnik et al., 2017
Nar	Narva Culture Baltic ceramist hunter-gatherers	Narva Culture	4,346–4,219 BCE	Kivisaare	Estonia	Kivisaare		U5a2d	Saag et al., 2017
NNBA	Northern Neolith-Bronze AgeLNBA	Northern_LNBA	2196-2023 calBCE (OxA-28269)	Falshöj	Denmark	RISE71		H3b	Allentoft et al., 2015
NNBA	Northern Neolith-Bronze AgeLNBA	Northern_LNBA	2851-2492 calBCE (OxA-28296)	Kyndelöse	Denmark	RISE61		J1	Allentoft et al., 2015
NNBA	Northern Neolith-Bronze AgeLNBA	Northern_LNBA	2621-2472 calBCE (OxA-29033)	Viby	Sweden	RISE94		K1a2a	Allentoft et al., 2015
NNBA	Northern Neolith-Bronze AgeLNBA	Northern_LNBA	2010-1776 calBCE (OxA-29193)	Abekås I	Sweden	RISE179		K1a3	Allentoft et al., 2015
NNBA	Northern Neolith-Bronze AgeLNBA	Northern_LNBA	2275-2032 calBCE (OxA-28987)	L Beddinge 56	Sweden	RISE98		K1b1a1	Allentoft et al., 2015
NNBA	Northern Neolith-Bronze AgeLNBA	Northern_LNBA	2025-1885 calBCE (OxA-28986)	Fredriksberg	Sweden	RISE97		K2a5	Allentoft et al., 2015
NNBA	Northern Neolith-Bronze AgeLNBA	Northern_LNBA	1499-1324 calBCE (OxA-28258)	Sebber skole	Denmark	RISE47		N1	Allentoft et al., 2015
NNBA	Northern Neolith-Bronze AgeLNBA	Northern_LNBA	1432-1292 calBCE (OxA-29654)	Ängamöllan	Sweden	RISE210		T2a1a	Allentoft et al., 2015
NNBA	Northern Neolith-Bronze AgeLNBA	Nordic LN	2191-1972 calBC	Marbjerg	Denmark	RISE42		H3v	Allentoft et al., 2015
NNBA	Northern Neolith-Bronze AgeLNBA	Nordic BA	1493-1302 calBC	Angamollan	Sweden	RISE207		J1c8a	Allentoft et al., 2015
NNBA	Northern Neolith-Bronze AgeLNBA	Nordic BA	1426-1281 calBC	Karlstrup	Denmark	RISE21		N1a1a1a2	Allentoft et al., 2015
NNBA	Northern Neolith-Bronze AgeLNBA	Northern_LNBA	1395-1132 calBCE (OxA-28998)	Abekås I	Sweden	RISE175		T1a1	Mathieson et al., 2015
NNBA	Northern Neolith-Bronze AgeLNBA	Northern_LNBA	794-547 calBCE (OxA-30485)	Trundholm mose II	Denmark	RISE276		T2b11	Mathieson et al., 2015
NNBA	Northern Neolith-Bronze AgeLNBA	Funnel Beaker Culture	3625-3371 calBCE	Kvärlöv, Saxtorp, Skåne	Sweden	Saxtorp5158T		H	Mittnik et al., 2017
NNBA	Northern Neolith-Bronze AgeLNBA	Funnel Beaker Culture	3945-3647 calBCE	Kvärlöv, Saxtorp, Skåne	Sweden	Saxtorp5164_TRB		T2b	Mittnik et al., 2017
NNBA	Northern Neolith-Bronze AgeLNBA	Funnel Beaker Culture	no data	Kvärlöv, Saxtorp Skåne	Sweden	Saxtorp389		T2b	Mittnik et al., 2017
NNBA	Northern Neolith-Bronze AgeLNBA	Funnel Beaker Culture	no data	Kvärlöv, Saxtorp Skåne	Sweden	Saxtorp462T		T2b	Mittnik et al., 2017
NNBA	Northern Neolith-Bronze AgeLNBA	Funnel Beaker Culture	no data	Kvärlöv, Saxtorp Skåne	Sweden	Saxtorp4815		T2b	Mittnik et al., 2017
NNBA	Northern Neolith-Bronze AgeLNBA	no data	2573-2140 calBCE	Ölsund, Hälsingland	Sweden	Olsund_LN		U4c2a	Mittnik et al., 2017
PalA	Paleolithic	Paleolithic	39000–36000 cal BP	Kostenki	Russia	Kostenki_12		U2'3'4'7'8'9	Benazzi et al., 2015
PalA	Paleolithic	Paleolithic	45000 cal BP	Western Siberia	Russia	Ust_Ishim		R	Fu et al., 2014
PalA	Paleolithic	Paleolithic	31,155 ± 85	Dolni Vestonice	Czech Republic	Dolni_Vestonice_14		U5/U	Fu et al., 2013
PalA	Paleolithic	Paleolithic	31,155 ± 85	Dolni Vestonice	Czech Republic	Dolni_Vestonice_15		U5/U	Fu et al., 2013
PalA	Paleolithic	Paleolithic	31155 ± 85 calBP	Dolni Vestonice	Czech Republic	Dolni_Vestonice_13		U8c	Fu et al., 2013
PalA	Paleolithic	Unassigned	14,020 ± 150 callBP	Düsseldorf	Germany	Oberkassel_998		U5b1	Fu et al., 2013
PalA	Paleolithic	Unassigned	13,430 ± 140 call BP	Oberkassel	Germany	Oberkassel_999		U5b1b	Fu et al., 2013
PalA	Paleolithic	Paleolithic	35000 yBP	Peștera Muierii 1	Romania	Hervella_2016:ALL		U6	Hervella et al., 2016
PalA	Paleolithic	Upper Palaeolithic	13200 cal BP	Satsurblia	Georgia	Jones_2015_Satsurblia:ALL		K3	Jones et al., 2015
PalA	Paleolithic	Upper Palaeolithic	13500 cal BP	Bichon	Switzerland	Jones_2015_Bichon:ALL		U5b1h	Jones et al., 2015
PalA	Paleolithic	Paleolithic	37,985 ± 665 calBP	Kostenki	Russia	Kostenki_14		U2	Krause et al., 2010
PalA	Paleolithic	Aurignacian	30880 +170, -160 calBP	Troisième caverne (Goyet)	Belgium	GoyetQ116-1	KU534952.1	M	Posth et al., 2016
PalA	Paleolithic	Aurignacian	29370 +180, -170 calBP	Troisième caverne (Goyet)	Belgium	GoyetQ376-3	KU534953.1	M	Posth et al., 2016
PalA	Paleolithic	Aurignacian	29370 +180, -170 calBP	Troisième caverne (Goyet)	Belgium	GoyetQ376-19	KU534967.1	U2	Posth et al., 2016
PalA	Paleolithic	Epigravettian	15460±220 calBP	Grotta Paglicci	Italy	Paglicci71	KU534950.1	U5b2b	Posth et al., 2016
PalA	Paleolithic	Epipaleolithic	10140±50 calBP	Aven des Iboussières (Malataverne)	France	Iboussieres31-2	KU534976.1	U5b1b	Posth et al., 2016
PalA	Paleolithic	Epipaleolithic	10140±50 calBP	Aven des Iboussières (Malataverne)	France	Iboussieres25-1	KU534981.1	U5b2a1a1b	Posth et al., 2016
PalA	Paleolithic	Epipaleolithic	10140±50 calBP	Aven des Iboussières (Malataverne)	France	Iboussieres39	KU534972.1	U5b2b	Posth et al., 2016
PalA	Paleolithic	Epipaleolithic	11120±50 calBP	Rochedane (Villars-sous-Dampjoux)	France	Rochedane	KU534971.1	U5b2b	Posth et al., 2016
PalA	Paleolithic	Gravettian	23630±130 calBP	La Rochette	France	LaRochette	KU534951.1	M	Posth et al., 2016
PalA	Paleolithic	Gravettian	23920±100 calBP	Troisième caverne (Goyet)	Belgium	GoyetQ53-1	KU534966.1	U2	Posth et al., 2016
PalA	Paleolithic	Gravettian	23270 +120, -110 calBP	Troisième caverne (Goyet)	Belgium	GoyetQ55-2	KU534948.1	U2	Posth et al., 2016
PalA	Paleolithic	Gravettian	22100±100 calBP	Troisième caverne (Goyet)	Belgium	GoyetQ56-16	KU534965.1	U2	Posth et al., 2016
PalA	Paleolithic	Gravettian	23470±370 calBP	Grotta Paglicci	Italy	Paglicci108	KU534968.1	U2'3'4'7'8'9	Posth et al., 2016
PalA	Paleolithic	Gravettian	22360±110 cal BP	Troisième caverne (Goyet)	Belgium	Goyet2878-21	KU534955.1	U5	Posth et al., 2016
PalA	Paleolithic	Gravettian	28100±400 calBP	Grotta Paglicci	Italy	Paglicci133	KU534956.1	U8c	Posth et al., 2016
PalA	Paleolithic	Magdalenian	12930 ± 55 calBP	Rigney 1	France	Rigney1	KU534957.1	U2c'd	Posth et al., 2016
PalA	Paleolithic	Magdalenian	12470±65 calBP	Bockstein Höhle	Germany	Bockstein	KU534973.1	U5b1d1	Posth et al., 2016
PalA	Paleolithic	Magdalenian	12650±50 calBP	Troisième caverne (Goyet)	Belgium	GoyetQ-2	KU534963.1	U8a	Posth et al., 2016
PalA	Paleolithic	Magdalenian	12450±110 calBP	Burkhardtshöhle	Germany	Burkhardtshohle	KU534960.1	U8a	Posth et al., 2016
PalA	Paleolithic	Magdalenian	12770±220 calBP	Hohle Fels	Germany	HohleFels10	KU534961.1	U8a	Posth et al., 2016
PalA	Paleolithic	Magdalenian	12770±220 calBP	Hohle Fels	Germany	HohleFels49	KU534964.1	U8a	Posth et al., 2016
PalA	Paleolithic	Magdalenian	12490±70 calBP	Hohle Fels	Germany	HohleFels79	KU534962.1	U8a	Posth et al., 2016
PalA	Paleolithic	Paleolithic	25740±210 calBP	Dolni Vestonice	Czech Republic	Dolni_Vestonice16	KU534949.1	U5	Posth et al., 2016
PalA	Paleolithic	Paleolithic	25740±210 calBP	Dolni Vestonice	Czech Republic	Dolni_Vestonice43	KU534970.1	U5	Posth et al., 2016
PalA	Paleolithic	Unassigned	28510±170 calBP	Pes ̧tera Cioclovina Uscata ̆	Romania	Cioclovina1	KU534969.1	U	Posth et al., 2016
PalA	Paleolithic	Unassigned	17000 calBP	Afontova Gora-2	Russia	AfantovaGora3		R1b	Raghavan et al., 2014
PalA	Paleolithic	Unassigned	24000 calBP	Mal'ta	Russia	Malta		U	Raghavan et al., 2014
PalA	Paleolithic	Paleolithic	41000–39000 cal BP	Fumane	Italy	Fumane2_mtDNA		R9	Seguin-Orlando et al., 2014
PoBA	Poltavka-Potapovka BA	Poltavka BA	2800-2200 BCE	Nikolaevka III, Samara River, Samara	Russia	I0374		H13a1a	Mathieson et al., 2015
PoBA	Poltavka-Potapovka BA	Poltavka BA	2867-2484 calBCE (AA53803)	Kutuluk III, Kutuluk River, Samara	Russia	I0126		H6a2	Mathieson et al., 2015
PoBA	Poltavka-Potapovka BA	Poltavka BA	2885-2665 calBCE (Beta 392492)	Lopatino II, Sok River, Samara	Russia	I0440		I3a	Mathieson et al., 2015
PoBA	Poltavka-Potapovka BA	Poltavka BA	2875-2580 calBCE (Beta 392488)	Grachevka II, Sok River, Samara	Russia	I0371		U2d2	Mathieson et al., 2015
PoBA	Poltavka-Potapovka BA	Poltavka BA	2925-2536 calBCE (AA12569)	Potapovka I, Sok River, Samara	Russia	I0432		U5a1c	Mathieson et al., 2015
PoBA	Poltavka-Potapovka BA	Potapovka BA	2469-1928 calBCE (AA12568)	Utyevka VI, Samara_River, Samara	Russia	I0246		C1	Mathieson et al., 2015
PoBA	Poltavka-Potapovka BA	Potapovka BA	2125-2044 calBCE (AA53802)	Utyevka IV, Samara River, Samara	Russia	I0418		T1a1	Mathieson et al., 2015
PoBA	Poltavka-Potapovka BA	Potapovka BA	2200-1900 BCE	Utyevka VI, Samara River, Samara	Russia	I0419		U2e1h	Mathieson et al., 2015
Scy	Iron Age	Scythian_IA	4th-2nd BCE	Glinoe	Moldova	KX977310	SCY192	H8c	Juras, Krzewińska, et al., 2017
Scy	Iron Age	Scythian_IA	4th-2nd BCE	Glinoe	Moldova	KX977311	SCY193	U5a2a1	Juras, Krzewińska, et al., 2017
Scy	Iron Age	Scythian_IA	4th-2nd BCE	Glinoe	Moldova	KX977313	SCY198/SCY196	W3a/U5a1c	Juras, Krzewińska, et al., 2017
Scy	Iron Age	Scythian_IA	4th-2nd BCE	Glinoe	Moldova	KX977312	SCY197	U5a1a1	Juras, Krzewińska, et al., 2017
Scy	Iron Age	Scythian_IA	4th-2nd BCE	Glinoe	Moldova	KX977314	SCY300	H5b	Juras, Krzewińska, et al., 2017
Scy	Iron Age	Scythian_IA	4th-2nd BCE	Glinoe	Moldova	KX977315	SCY303	U5a1a2b	Juras, Krzewińska, et al., 2017
Scy	Iron Age	Scythian_IA	4th-2nd BCE	Glinoe	Moldova	KX977316	SCY305	U5a2b	Juras, Krzewińska, et al., 2017
Scy	Iron Age	Scythian_IA	4th-2nd BCE	Glinoe	Moldova	KX977317	SCY308	F1d	Juras, Krzewińska, et al., 2017
Scy	Iron Age	Scythian_IA	4th-2nd BCE	Glinoe	Moldova	KX977318	SCY311	T2b	Juras, Krzewińska, et al., 2017
Scy	Iron Age	Scythian_IA	4th-2nd BCE	Glinoe	Moldova	KX977319	SCY333/SCY332	M10a1a1a	Juras, Krzewińska, et al., 2017
Scy	Iron Age	Scythian_IA	4th-2nd BCE	Glinoe	Moldova	KX977320	SCY334	H5b	Juras, Krzewińska, et al., 2017
Scy	Iron Age	Scythian_IA	4th BCE	Svetlovodsk	Ukraine	KX977302	SCY001	U5a1b	Juras, Krzewińska, et al., 2017
Scy	Iron Age	Scythian_IA	4th BCE	Svetlovodsk	Ukraine	KX977303	SCY002	J1c2	Juras, Krzewińska, et al., 2017
Scy	Iron Age	Scythian_IA	7th BCE	Starosillya	Ukraine	KX977305	SCY006	D4j2	Juras, Krzewińska, et al., 2017
Scy	Iron Age	Scythian_IA	4th BCE	Nesterivka	Ukraine	KX977308	SCY011	A	Juras, Krzewińska, et al., 2017
Scy	Iron Age	Scythian_IA	4th-3rd BCE	Vapnyarka	Ukraine	KX977309	SCY012	U5b2a1a2	Juras, Krzewińska, et al., 2017
Scy	Iron Age	Scythian_IA	7th BCE	Starosillya	Ukraine	KX977306	SCY009	J2b1a6	Juras, Krzewińska, et al., 2017
Scy	Iron Age	Scythian_IA	7th BCE	Starosillya	Ukraine	KX977307	SCY010	N1b1a	Juras, Krzewińska, et al., 2017
Scy	Iron Age	Scythian_IA	3rd-2nd BCE	Simferopol	Ukraine	KX977304	SCY005	H/H101	Juras, Krzewińska, et al., 2017
Scy	Iron Age	Scythian_IA	380-200 calBCE (Beta 392493)	Nadezhdinka, Volga Steppes, Samara	Russia	I0247		G2a4	Mathieson et al., 2015
Sint	Andronovo-Sintashta	Andronovo	1727-1511 calBCE (OxA-31445)	Kytmanovo	Russia	RISE503		U2e2a	Allentoft et al., 2015
Sint	Andronovo-Sintashta	Andronovo	1746-1626 calBCE (OxA-31216)	Kytmanovo	Russia	RISE505		U4a1b	Allentoft et al., 2015
Sint	Andronovo-Sintashta	Andronovo	no data	Kytmanovo	Russia	RISE500		U4d1	Allentoft et al., 2015
Sint	Andronovo-Sintashta	Andronovo_outlier	1446-1298 calBCE (OxA-31217)	Kytmanovo	Russia	RISE512		U2e1	Allentoft et al., 2015
Sint	Andronovo-Sintashta	Sintashta	2298-2045 calBCE (OxA-30991)	Bulanovo	Russia	RISE386		J1c1b1a	Allentoft et al., 2015
Sint	Andronovo-Sintashta	Sintashta	2120-1887 calBCE (OxA-30998)	Tanabergen II	Kazakhstan	RISE391		N1a1a1a1	Allentoft et al., 2015
Sint	Andronovo-Sintashta	Sintashta	1949-1754 calBCE (OxA-30993)	Bulanovo	Russia	RISE394		U2e1e	Allentoft et al., 2015
Sint	Andronovo-Sintashta	Sintashta	1960-1756 calBCE (OxA-30996)	Bol'shekaraganskii	Russia	RISE395		U2e1h	Allentoft et al., 2015
Sint	Andronovo-Sintashta	Sintashta	2126-1896 calBCE (OxA-30999)	Stepnoe VII	Russia	RISE392		J2b1a2a	Mathieson et al., 2015
Sru	Srubnaya	Srubnaya	1850-1200 BCE	Barinovka I, Samara River, Samara	Russia	I0423		J2b1a2a	Allentoft et al., 2015
Sru	Srubnaya	Srubnaya	1850-1200 BCE	Barinovka I, Samara River, Samara	Russia	I0422		T1a1	Allentoft et al., 2015
Sru	Srubnaya	Srubnaya	1850-1200 BCE	Spiridonovka IV, Samara River, Samara	Russia	I0360		U5a1	Haak et al., 2015; I. P. Lazaridis et al., 2016
Sru	Srubnaya	Srubnaya_outlier	2016-1692 calBCE (AA47809)	Spiridonovka IV, Samara River, Samara	Russia	I0354		U5a1	Haak et al., 2015; I. P. Lazaridis et al., 2016
Sru	Srubnaya	Srubnaya	1850-1600 BCE	Spiridonovka II, Samara River, Samara	Russia	I0431		H2b	Mathieson et al., 2015
Sru	Srubnaya	Srubnaya	1850-1600 BCE	Spiridonovka II, Samara River, Samara	Russia	I0430		H3g	Mathieson et al., 2015
Sru	Srubnaya	Srubnaya	1850-1200 BCE	Spiridonovka IV, Samara River, Samara	Russia	I0361		H5b	Mathieson et al., 2015
Sru	Srubnaya	Srubnaya	1913-1629 calBCE (AA47808)	Spiridonovka IV, Samara River, Samara	Russia	I0358		H6a1a	Mathieson et al., 2015
Sru	Srubnaya	Srubnaya	1850-1600 BCE	Rozhdestveno I, Samara Steppes, Samara	Russia	I0234		I1a1	Mathieson et al., 2015
Sru	Srubnaya	Srubnaya	1850-1600 BCE	Rozhdestvenno I, Samara Steppes, Samara	Russia	I0235		K1b2a	Mathieson et al., 2015
Sru	Srubnaya	Srubnaya	1850-1600 BCE	Uvarovka I, Samara River, Samara	Russia	I0424		T2b4	Mathieson et al., 2015
Sru	Srubnaya	Srubnaya	1850-1200 BCE	Novoselki, Northern Forest, Samara	Russia	I0232		U5a1f2	Mathieson et al., 2015
Sru	Srubnaya	Srubnaya	1850-1200 BCE	Spiridonovka IV, Samara River, Samara	Russia	I0359		U5a2a1	Mathieson et al., 2015
Sru	Srubnaya	Srubnaya_1d_rel_I0430	1850-1600 BCE	Spiridonovka II, Samara River, Samara	Russia	I0421		H3g	Mathieson et al., 2015
Yam	Yamnaya	Yamnaya_Kalmykia	2887-2634 calBCE (GrA-58960)	Temrta IV	Russia	RISE547		T2a1a	Allentoft et al., 2015
Yam	Yamnaya	Yamnaya_Kalmykia	2849-2143 calBCE (IGAN-4079)	Ulan IV	Russia	RISE552		T2a1a	Allentoft et al., 2015
Yam	Yamnaya	Yamnaya_Kalmykia	no data	Temrta IV	Russia	RISE548		U4	Allentoft et al., 2015
Yam	Yamnaya	Yamnaya_Kalmykia	3334-2635 calBCE (IGAN-2880)	Peshany V	Russia	RISE550		U5a1	Allentoft et al., 2015
Yam	Yamnaya	Yamnaya_Kalmykia	2880-2632 calBCE (GrA-45038)	Sukhaya Termista I	Russia	RISE240		U5a1d1	Allentoft et al., 2015
Yam	Yamnaya	Yamnaya_Kalmykia	no data	Temrta IV	Russia	RISE546		U5a1d2b	Allentoft et al., 2015
Yam	Yamnaya	Yamnaya_Samara	3339-2917 calBCE (AA47804)	Lopatino I, Sok River, Samara	Russia	I0429		T2c1a2	Allentoft et al., 2015
Yam	Yamnaya	Yamnaya_Samara	3021-2635 calBCE (AA47807)	Luzkhi I, Samara River, Samara	Russia	I0438		U5a1a1	Allentoft et al., 2015
Yam	Yamnaya	Yamnaya_Samara	3305-2925 calBCE (Beta 392491)	Lopatino I, Sok River, Samara	Russia	I0439		U5a1a1	Allentoft et al., 2015
Yam	Yamnaya	Yamnaya_Samara	3300-2700 BCE	Ishkinovka I, Eastern Orenburg, Pre-Ural steppe, Samara	Russia	I0370		H13a1a1	Haak et al., 2015; I. P. Lazaridis et al., 2016
Yam	Yamnaya	Yamnaya_Samara	3010-2622 calBCE (AA47805)	Kurmanaevka III, Buzuluk, Samara	Russia	I0441		H2b	Haak et al., 2015; I. P. Lazaridis et al., 2016
Yam	Yamnaya	Yamnaya_Samara	3300-2700 BCE	Kutuluk I, Kutuluk River, Samara	Russia	I0444		H6a1b	Haak et al., 2015; I. P. Lazaridis et al., 2016
Yam	Yamnaya	Yamnaya_Samara	2910-2875 calBCE (Beta 392487)	Ekaterinovka, Southern Steppe, Samara	Russia	I0231		U4a1a	Haak et al., 2015; I. P. Lazaridis et al., 2016
Yam	Yamnaya	Yamnaya_Samara	3300-2700 BCE	Lopatino II, Sok River, Samara	Russia	I0443		W3a1a	Haak et al., 2015; I. P. Lazaridis et al., 2016
Yam	Yamnaya	Yamnaya_Samara	3090-2910 calBCE	Lopatino I, Sok River, Samara	Russia	I0357		W6c	Haak et al., 2015; I. P. Lazaridis et al., 2016
References:
Allentoft, M. E., Sikora, M., Sjögren, K.-G., Rasmussen, S., Rasmussen, M., Stenderup, J., … Willerslev, E. (2015). Population genomics of Bronze Age Eurasia. Nature, 522(7555), 167–172. https://doi.org/10.1038/nature14507
Benazzi, S., Talamo, V. S. S., Negrino, F., Peresani, M., Sawyer, S., Panetta, D., … Hublin, J. (2015). The makers of the Protoaurignacian and implications for Neandertal extinction. Science, 348(6236), 1–10. https://doi.org/10.1126/science.aaa2773
Bollongino, R., Nehlich, O., Richards, M. P., Orschiedt, J., Thomas, M. G., Sell, C., … Burger, J. (2013). 2000 Years of Parallel Societies in Stone Age Central Europe. Science, 342(6157), 479–481. https://doi.org/10.1126/science.1245049
Der Sarkissian, C., Allentoft, M. E., Ávila-Arcos, M. C., Barnett, R., Campos, P. F., Cappellini, E., … Orlando, L. (2015). Ancient genomics. Philosophical Transactions of the Royal Society of London. Series B, Biological Sciences, 370(1660), 20130387. https://doi.org/10.1098/rstb.2013.0387
Fu, Q., Li, H., Moorjani, P., Jay, F., Slepchenko, S. M., Bondarev, A. A., … Pääbo, S. (2014). Genome sequence of a 45,000-year-old modern human from western Siberia. Nature, 514(7523), 445–9. https://doi.org/10.1038/nature13810
Fu, Q., Mittnik, A., Johnson, P. L. F., Bos, K., Lari, M., Bollongino, R., … Krause, J. (2013). A revised timescale for human evolution based on ancient mitochondrial genomes. Current Biology, 23(7), 553–559. https://doi.org/10.1016/j.cub.2013.02.044
Gamba, C., Jones, E. R., Teasdale, M. D., McLaughlin, R. L., Gonzalez-Fortes, G., Mattiangeli, V., … Pinhasi, R. (2014). Genome flux and stasis in a five millennium transect of European prehistory. Nature Communications, 5, 5257. https://doi.org/10.1038/ncomms6257
Günther, T., Valdiosera, C., Malmström, H., Ureña, I., Rodriguez-Varela, R., Sverrisdóttir, Ó. O., … Jakobsson, M. (2015). Ancient genomes link early farmers from Atapuerca in Spain to modern-day Basques. Proceedings of the National Academy of Sciences of the United States of America, 112(38), 11917–22. https://doi.org/10.1073/pnas.1509851112
Haak, W., Lazaridis, I., Patterson, N., Rohland, N., Mallick, S., Llamas, B., … Reich, D. (2015). Massive migration from the steppe was a source for Indo-European languages in Europe. Nature, 522(7555), 207–211. https://doi.org/10.1038/nature14317
Hervella, M., Svensson, E. M., Alberdi, A., Günther, T., Izagirre, N., Munters, A. R., … De-la-Rua, C. (2016). The mitogenome of a 35,000-year-old Homo sapiens from Europe supports a Palaeolithic back-migration to Africa. Scientific Reports, 6(14), 25501. https://doi.org/10.1038/srep25501
Hofmanova, Z., Kreutzer, S., Hallenthal, G., Sell, C., & Diekmann, Y. (2016). Early farmers from across Europe directly descended from Neolithic Aegeans. Proceedings of the National Academy of Sciences of the United States of America, 113(25), 6886–6891. https://doi.org/10.1038/nature13025
Jones, E. R., Gonzalez-Fortes, G., Connell, S., Siska, V., Eriksson, A., Martiniano, R., … Walsh, S. (2015). Upper Palaeolithic genomes reveal deep roots of modern Eurasians. Nature Communications, 6, 8912. https://doi.org/10.1038/ncomms9912
Juras, A., Chyleński, M., Krenz-Niedbała, M., Malmström, H., Ehler, E., Pospieszny, Ł., … Dabert, M. (2017). Investigating kinship of Neolithic post-LBK human remains from Krusza Zamkowa, Poland using ancient DNA. Forensic Science International: Genetics, 26, 30–39. https://doi.org/10.1016/j.fsigen.2016.10.008
Juras, A., Krzewińska, M., Nikitin, A. G., Ehler, E., Chyleński, M., Łukasik, S., … Götherström, A. (2017). Diverse origin of mitochondrial lineages in Iron Age Black Sea Scythians. Scientific Reports, 7(January), 43950. https://doi.org/10.1038/srep43950
Kılınç, G. M., Omrak, A., Özer, F., Günther, T., Büyükkarakaya, A. M., Bıçakçı, E., … Götherström, A. (2016). The Demographic Development of the First Farmers in Anatolia. Current Biology, 26(19), 2659–2666. https://doi.org/10.1016/j.cub.2016.07.057
Krause, J., Fu, Q., Good, J. M., Viola, B., Shunkov, M. V, Derevianko, A. P., & Pääbo, S. (2010). The complete mitochondrial DNA genome of an unknown hominin from southern Siberia. Nature, 464(7290), 894–897. https://doi.org/10.1038/nature08976
Lazaridis, I. P., Nadel, D., Rollefson, G., Merrett, D. C., Rohland, N., Mallick, S., … Reich, D. (2016). Genomic insights into the origin of farming in the ancient Near East. Nature, 536(7617), 419–424. https://doi.org/10.1038/nature19310
Lazaridis, I., Patterson, N., Mittnik, A., Renaud, G., Mallick, S., Kirsanow, K., … Krause, J. (2014). Ancient human genomes suggest three ancestral populations for present-day Europeans. Nature, 513(7518), 409–13. https://doi.org/10.1038/nature13673
Margaryan, A., Derenko, M., Hovhannisyan, H., Malyarchuk, B., Heller, R., Khachatryan, Z., … Allentoft, M. E. (2017). Eight Millennia of Matrilineal Genetic Continuity in the South Caucasus. Current Biology, 1–6. https://doi.org/10.1016/j.cub.2017.05.087
Martiniano, R., Caffell, A., Holst, M., Hunter-Mann, K., Montgomery, J., Müldner, G., … Bradley, D. G. (2016). Genomic signals of migration and continuity in Britain before the Anglo-Saxons. Nature Communications, 7, 10326. https://doi.org/10.1038/ncomms10326
Mathieson, I., Lazaridis, I., Rohland, N., Mallick, S., Patterson, N., Roodenberg, S. A., … Reich, D. (2015). Genome-wide patterns of selection in 230 ancient Eurasians. Nature, 528(7583), 499–503. https://doi.org/10.1038/nature16152
Mittnik, A., Wang, C.-C., Pfrengle, S., Daubaras, M., Zariņa, G., Hallgren, F., … Krause, J. (2017). The Genetic History of Northern Europe. bioRxiv, 1–26. https://doi.org/10.1101/113241
Olalde, I., Sánchez-Quinto, F., Datta, D., Marigorta, U. M., Chiang, C. W. K., Rodríguez, J. A., … Lalueza-Fox, C. (2014). Genomic analysis of the blood attributed to Louis XVI (1754-1793), king of France. Scientific Reports, 4, 4666. https://doi.org/10.1038/srep04666
Posth, C., Renaud, G., Mittnik, A., Drucker, D. G., Rougier, H., Cupillard, C., … Krause, J. (2016). Pleistocene mitochondrial genomes suggest a single major dispersal of non-africans and a late glacial population turnover in Europe. Current Biology, 26(6), 827–833. https://doi.org/10.1016/j.cub.2016.01.037
Raghavan, M., DeGiorgio, M., Albrechtsen, A., Moltke, I., Skoglund, P., Korneliussen, T. S., … Willerslev, E. (2014). The genetic prehistory of the New World Arctic - Supplementary information. Science, 345(6200), 1255832–1255832. https://doi.org/10.1126/science.1255832
Saag, L., Varul, L., Scheib, C. L., Stenderup, J., Allentoft, M. E., Saag, L., … Metspalu, M. (2017). Extensive farming in Estonia started through a sex-biased migration from the Steppe. Current Biology, 27, 1–9. https://doi.org/10.1101/112714
Schiffels, S., Haak, W., Paajanen, P., Llamas, B., Popescu, E., Loe, L., … Durbin, R. (2016). Iron Age and Anglo-Saxon genomes from East England reveal British migration history. Nature Communications, 7, 1–9. https://doi.org/10.1038/ncomms10408
Seguin-Orlando, A., Korneliussen, T. S., Sikora, M., Malaspinas, A., Manica, A., Moltke, I., … Foley, R. A. (2014). Genomic structure in Europeans dating back at least 36 , 200 years. Science, 346(6213), 1113–1118. https://doi.org/10.1126/science.aaa0114

## Sheet: S3d other ancient list
S4d Table: Ancient samples considered only in the phylogenetic analysis but not used in population genetic analysis. Supplementary references are provided below the table.
Culture or age	Date	Location	Country	GeneBank ID	Other ID	mtDNA haplotype	Reference
LBA	no data	Velika Gruda	Montenegro	RISE595		U5a2	Allentoft et al., 2015
LBA	no data	Velika Gruda	Montenegro	RISE596		X1'2'3	Allentoft et al., 2015
Remedello Copper A	3483-3107 calBCE (OxA-X-2621)	Remedello di Sotto	Italy	RISE487		H3d	Allentoft et al., 2015
Remedello Copper A	2134-1773 calBCE (ETH-12913)	Remedello di Sotto	Italy	RISE486		J1c	Allentoft et al., 2015
Remedello Copper A	2908-2578 calBCE (ETH-12188)	Remedello di Sotto	Italy	RISE489		X2c1	Allentoft et al., 2015
Okunevo	2340-2145 calBC	Verkhni Askiz Village	Russia	RISE515		A8a	Allentoft et al., 2015
Okunevo	2201-2036 calBC	Verkhni Askiz Village	Russia	RISE516		H6a1b	Allentoft et al., 2015
Mezhovskaya	no data	Kapova cave	Russia	RISE525		I5c	Allentoft et al., 2015
Mezhovskaya	no data	Kapova cave	Russia	RISE524		J2b1a	Allentoft et al., 2015
Mezhovskaya	1598-1398 calBC	Kapova cave	Russia	RISE523		M12'G	Allentoft et al., 2015
Iron Age	427-611 AD	Oxie 7	Sweden	RISE174		W1	Allentoft et al., 2015
Russia_EBA	2857-2497 calBCE (AAR-20358)	Stalingrad Quarry	Russia	RISE555		N1a1a2	Allentoft et al., 2015
Thracian culture_EIA	800–500 BC	Svilengrad	Bulgaria	Carpenter_2013_P192:ALL		U3b	Carpenter et al., 2013
Thracian tumulus_	850–700 BC	Stambolovo	Bulgaria	Carpenter_2013_T2G2:ALL		HV	Carpenter et al., 2013
pre-Columbian Chachapoyan and Chachapoya-Inca	1000-1500 AD	Laguna de los Condores	Peru	Carpenter_2013_NA39:ALL		B2	Carpenter et al., 2013
pre-Columbian Chachapoyan and Chachapoya-Inca	1000-1500 AD	Laguna de los Condores	Peru	Carpenter_2013_NA42:ALL		D1	Carpenter et al., 2013
pre-Columbian Chachapoyan and Chachapoya-Inca	1000-1500 AD	Laguna de los Condores	Peru	Carpenter_2013_NA40:ALL		M	Carpenter et al., 2013
Hun_period	400-500 AD	Budapest (Vezér utca)	Hungary	Hun_from_Hungary_Djansugurova:ALL		D4j12	Dzhansugurova et al., 2017
	NA		Italy	Continenza_8		U5b2b1	Fu et al., 2013
Iceman	3359-3105 BCE	Tisenjoch	Italy	Iceman		K1f	Keller et al., 2012
	527 BP	Leicester	England	King_2015:ALL		J1c2c3	King et al., 2014
founding population New Zealand	1285–1300 AD	Wairau Bar Site	New Zealand	JX893365.1		B4a1a1	Knapp et al., 2012
founding population New Zealand	1285–1300 AD	Wairau Bar Site	New Zealand	JX893364.1		B4a1a1c	Knapp et al., 2012
founding population New Zealand	1285–1300 AD	Wairau Bar Site	New Zealand	JX893366.1		L2'3'4'5'6	Knapp et al., 2012
founding population New Zealand	1285–1300 AD	Wairau Bar Site	New Zealand	JX893367.1		N	Knapp et al., 2012
Ganj_Dareh_Iran_Neolithic	8000-7700 BCE	Ganj Dareh	Iran	S1949		NA	Lazaridius et al., 2016
PPNB (Levant_N)	8197-7653 calBCE (8790±50 BP, Poz-81101)	'Ain Ghazal	Jordan	S1415		NA	Lazaridius et al., 2016
PPNB (Levant_N)	8300-7900 BCE	'Ain Ghazal	Jordan	S1416		NA	Lazaridius et al., 2016
PPNB (Levant_N)	8300-7900 BCE	'Ain Ghazal	Jordan	S1709		NA	Lazaridius et al., 2016
Israel_Natufian	11840-9760 BCE	Raqefet Cave	Israel	S1069		NA	Lazaridius et al., 2016
Israel_Natufian	11520-11110 calBCE (11405±120 BP, RTK-6607)	Raqefet Cave	Israel	S1687		NA	Lazaridius et al., 2016
Israel_Natufian	11840-9760 BCE	Raqefet Cave	Israel	S1690		NA	Lazaridius et al., 2016
	4500 BP	Mota Cave	Ethiopia	LLorente_Mota		L3x2a	Llorentel et al., 2015
IA	210 BC-40 AD	Melton	England	Martiniano_2016_M1489_IronAge:ALL		U2e1e	Martiniano et al., 2016
	2500 cal BP	Byrsa	Tunisia	KT760574.2		U5b2c1	Matisoo-Smith et al., 2016
Samara_Eneolithic	5200-4000 BCE	Khvalynsk II, Volga River, Samara	Russia	I0122		H2a1	Matthieson et al., 2015
Samara_Eneolithic	5200-4000 BCE	Khvalynsk II, Volga River, Samara	Russia	I0434		U4d	Matthieson et al., 2015
Samara_Eneolithic	5200-4000 BCE	Khvalynsk II, Volga River, Samara	Russia	I0433		U5a1i	Matthieson et al., 2015
	720–610 calBP	Thaskkurgan (East Pamir)	China	KT023499.1		U5a2a1	Ning et al., 2015
	1600 AD	St. Mary	USA	I2099		T2b4c	Reich et al., 2016
	1600 AD	St. Mary	USA	I2097		V24	Reich et al., 2016
LIA	170 BCE–80 CE	Hinxton	England	12884A		H1ag1	Schiffels et al., 2016
LIA	360–50 BCE	Linton	England	15579A		H1e	Schiffels et al., 2016
LIA	160 BCE–26 CE	Hinxton	England	12880A		K1a1b1b	Schiffels et al., 2016
References:
Allentoft, M. E., Sikora, M., Sjögren, K.-G., Rasmussen, S., Rasmussen, M., Stenderup, J., … Willerslev, E. (2015). Population genomics of Bronze Age Eurasia. Nature, 522(7555), 167–172. https://doi.org/10.1038/nature14507
Carpenter, M. L., Buenrostro, J. D., Valdiosera, C., Schroeder, H., Allentoft, M. E., Sikora, M., … Bustamante, C. D. (2013). Pulling out the 1%: Whole-Genome capture for the targeted enrichment of ancient dna sequencing libraries. American Journal of Human Genetics, 93(5), 852–864. https://doi.org/10.1016/j.ajhg.2013.10.002
Dzhansugurova, L.B., Dzhantaeva, K.B., Nurzhibek, Zhunussova, G.S., Kuzovleva, E.B., Musralina, L.Z., Evingern, S., Kustar, A., Ixan, O.A., Khussainova, E.М., 2017. ISOLATION AND ANALYSIS OF ANCIENT DNA FROM HUMAN BONES OF THE HUN PERIOD. News Natl. Acad. Sci. Repub. Kazakhstan. Ser. Biol. Medical
Fu, Q., Mittnik, A., Johnson, P. L. F., Bos, K., Lari, M., Bollongino, R., … Krause, J. (2013). A revised timescale for human evolution based on ancient mitochondrial genomes. Current Biology, 23(7), 553–559. https://doi.org/10.1016/j.cub.2013.02.044
Jones, E. R., Gonzalez-Fortes, G., Connell, S., Siska, V., Eriksson, A., Martiniano, R., … Walsh, S. (2015). Upper Palaeolithic genomes reveal deep roots of modern Eurasians. Nature Communications, 6, 8912. https://doi.org/10.1038/ncomms9912
Keller, A., Graefen, A., Ball, M., Matzas, M., Boisguerin, V., Maixner, F., … Zink, A. (2012). New insights into the Tyrolean Iceman’s origin and phenotype as inferred by whole-genome sequencing. Nature Communications, 3, 698. https://doi.org/10.1038/ncomms1701
King, T. E., Gonzalez-Fortes, G., Balaresque, P., Thomas, M. G., Balding, D., Maisano Delser, P., … Schürer, K. (2014). Identification of the remains of King Richard III. Nature Communications, 5(5631), 1–8. https://doi.org/10.1038/ncomms6631
Kircher, M., Sawyer, S., & Meyer, M. (2012). Double indexing overcomes inaccuracies in multiplex sequencing on the Illumina platform. Nucleic Acids Research, 40(1), 1–8. https://doi.org/10.1093/nar/gkr771
Knapp, M., Horsburgh, K. A., Prost, S., Stanton, J.-A., Buckley, H. R., Walter, R. K., & Matisoo-Smith, E. (2012). Complete mitochondrial DNA genome sequences from the first New Zealanders. Proceedings of the National Academy of Sciences, 109(45), 18350–18354. https://doi.org/10.1073/pnas.1209896109/-/DCSupplemental.www.pnas.org/cgi/doi/10.1073/pnas.1209896109
Lazaridis, I. P., Nadel, D., Rollefson, G., Merrett, D. C., Rohland, N., Mallick, S., … Reich, D. (2016). Genomic insights into the origin of farming in the ancient Near East. Nature, 536(7617), 419–424. https://doi.org/10.1038/nature19310
Llorente, M. G., Jones, E. R., Eriksson, A., Siska, V., Arthur, K. W., Arthur, J. W., … Manica, A. (2015). Ancient Ethiopian genome reveals extensive Eurasian admixture throughout the African continent. Science, 350(6262), 820–2. https://doi.org/10.1126/science.aad2879
Martiniano, R., Caffell, A., Holst, M., Hunter-Mann, K., Montgomery, J., Müldner, G., … Bradley, D. G. (2016). Genomic signals of migration and continuity in Britain before the Anglo-Saxons. Nature Communications, 7, 10326. https://doi.org/10.1038/ncomms10326
Mathieson, I., Lazaridis, I., Rohland, N., Mallick, S., Patterson, N., Roodenberg, S. A., … Reich, D. (2015). Genome-wide patterns of selection in 230 ancient Eurasians. Nature, 528(7583), 499–503. https://doi.org/10.1038/nature16152
Matisoo-Smith, E. A., Gosling, A. L., Boocock, J., Kardailsky, O., Kurumilian, Y., Roudesli-Chebbi, S., … Zalloua, P. A. (2016). A European mitochondrial haplotype identified in ancient Phoenician remains from Carthage, North Africa. PLoS ONE, 11(5), 1–16. https://doi.org/10.1371/journal.pone.0155046
Ning, C., Gao, S., Deng, B., Zheng, H., Wei, D., Lv, H., … Cui, Y. (2015). Ancient mitochondrial genome reveals trace of prehistoric migration in the east Pamir by pastoralists. Journal of Human Genetics, 61(2), 103–108. https://doi.org/10.1038/jhg.2015.128
Reich, D., Stewardson, K., Lazaridis, I., Mallick, S., Rohland, N., & Owsley, D. (2016). Ancient DNA analysis of St. Mary’s City Lead Coffins Burial. Retrieved from https://reich.hms.harvard.edu/sites/reich.hms.harvard.edu/files/inline-files/10_24_2016_Screening_report_for_St_Marys_City_burials_FINAL_IL copy.pdf
Schiffels, S., Haak, W., Paajanen, P., Llamas, B., Popescu, E., Loe, L., … Durbin, R. (2016). Iron Age and Anglo-Saxon genomes from East England reveal British migration history. Nature Communications, 7, 1–9. https://doi.org/10.1038/ncomms10408
